# Supplementary material for: LTBP3 Frameshift Variant in British Shorthair Cats with Complex Skeletal Dysplasia
Source: Genes (Basel). 2021 Nov 29;12(12):1923. doi: 10.3390/genes12121923 (PMC8701722; doi:10.3390/genes12121923)
Supplement: Supplementary file 1 [file genes-12-01923-s001.zip]

Archive with 4 entries (4 files):
- Supplementary_Figures_S1_S8.pdf
- Table_S1_genome_accessions.xlsx
- Table_S2_private_variants_R1.xlsx
- Video_S1.mp4
