# Supplementary material for: LTBP3 Frameshift Variant in British Shorthair Cats with Complex Skeletal Dysplasia
Source: Genes (Basel). 2021 Nov 29;12(12):1923. doi: 10.3390/genes12121923 (PMC8701722; doi:10.3390/genes12121923)
Supplement: Supplementary file 1 [file genes-12-01923-s001.zip › Table_S2_private_variants_R1.xlsx]

## Sheet: Sheet1
Table S2. Private variants in the genome of the affected British shorthair cat. Variants were called with respect to the Felis_catus_9.0 reference genome assembly. The functional annotation of the variants is based on the NCBI annotation release 104. The table is in "1 effect per line" format. Thus, one variant will be listed several times, if multiple effects, e.g. on different alternative trans…
#CHROM	POS	REF	ALT	FILTER	ALLELE	EFFECT	IMPACT	GENE	GENEID	FEATURE	FEATUREID	BIOTYPE	RANK	HGVS_C	HGVS_P	Remark
chrA1	60432	A	G	PASS	G	intergenic_region	MODIFIER	CHR_START-LOC102899061	CHR_START-102899061	intergenic_region	CHR_START-102899061		-1	n.60432A>G
chrA1	60454	C	T	PASS	T	intergenic_region	MODIFIER	CHR_START-LOC102899061	CHR_START-102899061	intergenic_region	CHR_START-102899061		-1	n.60454C>T
chrA1	60482	G	A	PASS	A	intergenic_region	MODIFIER	CHR_START-LOC102899061	CHR_START-102899061	intergenic_region	CHR_START-102899061		-1	n.60482G>A
chrA1	575021	C	A	PASS	A	intron_variant	MODIFIER	CENPJ	101081107	transcript	XM_003980244.4	protein_coding	11	c.3341-729G>T
chrA1	575021	C	A	PASS	A	intron_variant	MODIFIER	CENPJ	101081107	transcript	XM_019815063.2	protein_coding	12	c.3341-729G>T
chrA1	575021	C	A	PASS	A	intron_variant	MODIFIER	CENPJ	101081107	transcript	XM_019815190.2	protein_coding	12	c.3341-729G>T
chrA1	575021	C	A	PASS	A	intron_variant	MODIFIER	CENPJ	101081107	transcript	XM_019815226.2	protein_coding	11	c.3098-729G>T
chrA1	575021	C	A	PASS	A	intron_variant	MODIFIER	CENPJ	101081107	transcript	XM_019815137.2	protein_coding	12	c.3341-729G>T
chrA1	575021	C	A	PASS	A	intron_variant	MODIFIER	CENPJ	101081107	transcript	XM_019815312.2	protein_coding	12	c.3341-729G>T
chrA1	575021	C	A	PASS	A	intron_variant	MODIFIER	CENPJ	101081107	transcript	XM_006927146.4	protein_coding	12	c.3341-729G>T
chrA1	998888	C	T	PASS	T	intergenic_region	MODIFIER	ZMYM5-LOC111559482	101082032-111559482	intergenic_region	101082032-111559482		-1	n.998888C>T
chrA1	998904	C	T	PASS	T	intergenic_region	MODIFIER	ZMYM5-LOC111559482	101082032-111559482	intergenic_region	101082032-111559482		-1	n.998904C>T
chrA1	998920	C	T	PASS	T	intergenic_region	MODIFIER	ZMYM5-LOC111559482	101082032-111559482	intergenic_region	101082032-111559482		-1	n.998920C>T
chrA1	998936	C	T	PASS	T	intergenic_region	MODIFIER	ZMYM5-LOC111559482	101082032-111559482	intergenic_region	101082032-111559482		-1	n.998936C>T
chrA1	2130470	A	G	PASS	G	upstream_gene_variant	MODIFIER	SAP18	101083563	transcript	XM_023249619.1	protein_coding	-1	c.-1471A>G
chrA1	2130470	A	G	PASS	G	intergenic_region	MODIFIER	LOC109494173-SAP18	109494173-101083563	intergenic_region	109494173-101083563		-1	n.2130470A>G
chrA1	2260389	G	A	PASS	A	intron_variant	MODIFIER	ZDHHC20	101084079	transcript	XM_023249851.1	protein_coding	1	c.119-8358C>T
chrA1	2260389	G	A	PASS	A	intron_variant	MODIFIER	ZDHHC20	101084079	transcript	XR_002740282.1	pseudogene	1	n.82-8358C>T
chrA1	2260389	G	A	PASS	A	intron_variant	MODIFIER	ZDHHC20	101084079	transcript	XR_002740279.1	pseudogene	1	n.208-8358C>T
chrA1	2260389	G	A	PASS	A	intron_variant	MODIFIER	ZDHHC20	101084079	transcript	XR_002740280.1	pseudogene	1	n.214-8358C>T
chrA1	2260389	G	A	PASS	A	intron_variant	MODIFIER	ZDHHC20	101084079	transcript	XR_002740278.1	pseudogene	1	n.319-8358C>T
chrA1	2260389	G	A	PASS	A	intron_variant	MODIFIER	ZDHHC20	101084079	transcript	XM_023249859.1	protein_coding	1	c.119-8358C>T
chrA1	2260389	G	A	PASS	A	intron_variant	MODIFIER	ZDHHC20	101084079	transcript	XM_023249858.1	protein_coding	1	c.119-8358C>T
chrA1	2260389	G	A	PASS	A	intron_variant	MODIFIER	ZDHHC20	101084079	transcript	XM_023249862.1	protein_coding	1	c.119-8358C>T
chrA1	2260389	G	A	PASS	A	intron_variant	MODIFIER	ZDHHC20	101084079	transcript	XM_023249861.1	protein_coding	1	c.119-8358C>T
chrA1	2319489	C	A	PASS	A	intron_variant	MODIFIER	MICU2	101094561	transcript	XM_023249868.1	protein_coding	8	c.561-4480G>T
chrA1	2483990	T	G	PASS	G	intergenic_region	MODIFIER	MICU2-LOC109494431	101094561-109494431	intergenic_region	101094561-109494431		-1	n.2483990T>G
chrA1	2509875	A	G	PASS	G	5_prime_UTR_premature_start_codon_gain_variant	LOW	FGF9	101084335	transcript	XM_003980257.5	protein_coding	1	c.-257A>G
chrA1	2509875	A	G	PASS	G	5_prime_UTR_variant	MODIFIER	FGF9	101084335	transcript	XM_003980257.5	protein_coding	1	c.-257A>G
chrA1	2511608	A	C	PASS	C	intron_variant	MODIFIER	FGF9	101084335	transcript	XM_003980257.5	protein_coding	1	c.277+1200A>C
chrA1	2520606	G	A	PASS	A	intron_variant	MODIFIER	FGF9	101084335	transcript	XM_003980257.5	protein_coding	2	c.381+1409G>A
chrA1	2545475	C	T	PASS	T	downstream_gene_variant	MODIFIER	FGF9	101084335	transcript	XM_003980257.5	protein_coding	-1	c.*3241C>T
chrA1	2545475	C	T	PASS	T	intergenic_region	MODIFIER	FGF9-LOC111556740	101084335-111556740	intergenic_region	101084335-111556740		-1	n.2545475C>T
chrA1	2550296	C	T	PASS	T	downstream_gene_variant	MODIFIER	FGF9	101084335	transcript	XM_003980257.5	protein_coding	-1	c.*8062C>T
chrA1	2550296	C	T	PASS	T	intergenic_region	MODIFIER	FGF9-LOC111556740	101084335-111556740	intergenic_region	101084335-111556740		-1	n.2550296C>T
chrA1	2552324	G	A	PASS	A	intergenic_region	MODIFIER	FGF9-LOC111556740	101084335-111556740	intergenic_region	101084335-111556740		-1	n.2552324G>A
chrA1	2556558	T	C	PASS	C	intergenic_region	MODIFIER	FGF9-LOC111556740	101084335-111556740	intergenic_region	101084335-111556740		-1	n.2556558T>C
chrA1	2607752	T	G	PASS	G	intergenic_region	MODIFIER	FGF9-LOC111556740	101084335-111556740	intergenic_region	101084335-111556740		-1	n.2607752T>G
chrA1	2614467	C	T	PASS	T	intergenic_region	MODIFIER	FGF9-LOC111556740	101084335-111556740	intergenic_region	101084335-111556740		-1	n.2614467C>T
chrA1	2825758	G	A	PASS	A	intergenic_region	MODIFIER	FGF9-LOC111556740	101084335-111556740	intergenic_region	101084335-111556740		-1	n.2825758G>A
chrA1	2867443	G	C	PASS	C	intergenic_region	MODIFIER	FGF9-LOC111556740	101084335-111556740	intergenic_region	101084335-111556740		-1	n.2867443G>C
chrA1	2873342	A	G	PASS	G	intergenic_region	MODIFIER	FGF9-LOC111556740	101084335-111556740	intergenic_region	101084335-111556740		-1	n.2873342A>G
chrA1	2936987	G	A	PASS	A	intergenic_region	MODIFIER	LOC111556740-LOC109492527	111556740-109492527	intergenic_region	111556740-109492527		-1	n.2936987G>A
chrA1	3085323	C	G	PASS	G	intergenic_region	MODIFIER	LOC111556740-LOC109492527	111556740-109492527	intergenic_region	111556740-109492527		-1	n.3085323C>G
chrA1	3095004	TTATTATTA	T	PASS	T	intergenic_region	MODIFIER	LOC111556740-LOC109492527	111556740-109492527	intergenic_region	111556740-109492527		-1	n.3095005_3095012delTATTATTA
chrA1	3095017	A	G	PASS	G	intergenic_region	MODIFIER	LOC111556740-LOC109492527	111556740-109492527	intergenic_region	111556740-109492527		-1	n.3095017A>G
chrA1	3095020	G	C	PASS	C	intergenic_region	MODIFIER	LOC111556740-LOC109492527	111556740-109492527	intergenic_region	111556740-109492527		-1	n.3095020G>C
chrA1	3095030	A	C	PASS	C	intergenic_region	MODIFIER	LOC111556740-LOC109492527	111556740-109492527	intergenic_region	111556740-109492527		-1	n.3095030A>C
chrA1	3095039	AGT	A	PASS	A	intergenic_region	MODIFIER	LOC111556740-LOC109492527	111556740-109492527	intergenic_region	111556740-109492527		-1	n.3095040_3095041delGT
chrA1	3095042	A	ACG	PASS	ACG	intergenic_region	MODIFIER	LOC111556740-LOC109492527	111556740-109492527	intergenic_region	111556740-109492527		-1	n.3095042_3095043insCG
chrA1	3171282	G	GT	PASS	GT	intergenic_region	MODIFIER	LOC111556740-LOC109492527	111556740-109492527	intergenic_region	111556740-109492527		-1	n.3171282_3171283insT
chrA1	3336543	C	T	PASS	T	intergenic_region	MODIFIER	LOC109492527-LOC109492533	109492527-109492533	intergenic_region	109492527-109492533		-1	n.3336543C>T
chrA1	3339520	A	G	PASS	G	intergenic_region	MODIFIER	LOC109492527-LOC109492533	109492527-109492533	intergenic_region	109492527-109492533		-1	n.3339520A>G
chrA1	3340856	G	A	PASS	A	intergenic_region	MODIFIER	LOC109492527-LOC109492533	109492527-109492533	intergenic_region	109492527-109492533		-1	n.3340856G>A
chrA1	3341084	G	A	PASS	A	intergenic_region	MODIFIER	LOC109492527-LOC109492533	109492527-109492533	intergenic_region	109492527-109492533		-1	n.3341084G>A
chrA1	3342853	A	C	PASS	C	intergenic_region	MODIFIER	LOC109492527-LOC109492533	109492527-109492533	intergenic_region	109492527-109492533		-1	n.3342853A>C
chrA1	3343484	T	C	PASS	C	intergenic_region	MODIFIER	LOC109492527-LOC109492533	109492527-109492533	intergenic_region	109492527-109492533		-1	n.3343484T>C
chrA1	3481916	A	G	PASS	G	intergenic_region	MODIFIER	LOC109492534-LOC109497810	109492534-109497810	intergenic_region	109492534-109497810		-1	n.3481916A>G
chrA1	3491635	AG	A	PASS	A	intergenic_region	MODIFIER	LOC109492534-LOC109497810	109492534-109497810	intergenic_region	109492534-109497810		-1	n.3491636delG
chrA1	3493233	C	T	PASS	T	intergenic_region	MODIFIER	LOC109492534-LOC109497810	109492534-109497810	intergenic_region	109492534-109497810		-1	n.3493233C>T
chrA1	3493817	G	A	PASS	A	intergenic_region	MODIFIER	LOC109492534-LOC109497810	109492534-109497810	intergenic_region	109492534-109497810		-1	n.3493817G>A
chrA1	3494482	C	T	PASS	T	intergenic_region	MODIFIER	LOC109492534-LOC109497810	109492534-109497810	intergenic_region	109492534-109497810		-1	n.3494482C>T
chrA1	3500875	C	T	PASS	T	intergenic_region	MODIFIER	LOC109492534-LOC109497810	109492534-109497810	intergenic_region	109492534-109497810		-1	n.3500875C>T
chrA1	3505471	G	A	PASS	A	intergenic_region	MODIFIER	LOC109492534-LOC109497810	109492534-109497810	intergenic_region	109492534-109497810		-1	n.3505471G>A
chrA1	3506014	A	G	PASS	G	intergenic_region	MODIFIER	LOC109492534-LOC109497810	109492534-109497810	intergenic_region	109492534-109497810		-1	n.3506014A>G
chrA1	3509425	G	A	PASS	A	intergenic_region	MODIFIER	LOC109492534-LOC109497810	109492534-109497810	intergenic_region	109492534-109497810		-1	n.3509425G>A
chrA1	3510797	G	A	PASS	A	intergenic_region	MODIFIER	LOC109492534-LOC109497810	109492534-109497810	intergenic_region	109492534-109497810		-1	n.3510797G>A
chrA1	3511040	C	T	PASS	T	intergenic_region	MODIFIER	LOC109492534-LOC109497810	109492534-109497810	intergenic_region	109492534-109497810		-1	n.3511040C>T
chrA1	3517450	G	A	PASS	A	intergenic_region	MODIFIER	LOC109492534-LOC109497810	109492534-109497810	intergenic_region	109492534-109497810		-1	n.3517450G>A
chrA1	3522982	C	T	PASS	T	intergenic_region	MODIFIER	LOC109492534-LOC109497810	109492534-109497810	intergenic_region	109492534-109497810		-1	n.3522982C>T
chrA1	3527127	C	T	PASS	T	intergenic_region	MODIFIER	LOC109492534-LOC109497810	109492534-109497810	intergenic_region	109492534-109497810		-1	n.3527127C>T
chrA1	3541516	C	T	PASS	T	intergenic_region	MODIFIER	LOC109492534-LOC109497810	109492534-109497810	intergenic_region	109492534-109497810		-1	n.3541516C>T
chrA1	3546364	G	A	PASS	A	intergenic_region	MODIFIER	LOC109492534-LOC109497810	109492534-109497810	intergenic_region	109492534-109497810		-1	n.3546364G>A
chrA1	3547698	AC	A	PASS	A	intergenic_region	MODIFIER	LOC109492534-LOC109497810	109492534-109497810	intergenic_region	109492534-109497810		-1	n.3547699delC
chrA1	3548296	A	G	PASS	G	intergenic_region	MODIFIER	LOC109492534-LOC109497810	109492534-109497810	intergenic_region	109492534-109497810		-1	n.3548296A>G
chrA1	3563778	G	C	PASS	C	intergenic_region	MODIFIER	LOC109492534-LOC109497810	109492534-109497810	intergenic_region	109492534-109497810		-1	n.3563778G>C
chrA1	3564217	G	A	PASS	A	intergenic_region	MODIFIER	LOC109492534-LOC109497810	109492534-109497810	intergenic_region	109492534-109497810		-1	n.3564217G>A
chrA1	3576947	G	A	PASS	A	intergenic_region	MODIFIER	LOC109492534-LOC109497810	109492534-109497810	intergenic_region	109492534-109497810		-1	n.3576947G>A
chrA1	3577852	C	T	PASS	T	intergenic_region	MODIFIER	LOC109492534-LOC109497810	109492534-109497810	intergenic_region	109492534-109497810		-1	n.3577852C>T
chrA1	3579792	C	T	PASS	T	intergenic_region	MODIFIER	LOC109492534-LOC109497810	109492534-109497810	intergenic_region	109492534-109497810		-1	n.3579792C>T
chrA1	3591325	G	A	PASS	A	intergenic_region	MODIFIER	LOC109492534-LOC109497810	109492534-109497810	intergenic_region	109492534-109497810		-1	n.3591325G>A
chrA1	3591849	C	G	PASS	G	intergenic_region	MODIFIER	LOC109492534-LOC109497810	109492534-109497810	intergenic_region	109492534-109497810		-1	n.3591849C>G
chrA1	3591927	AT	A	PASS	A	intergenic_region	MODIFIER	LOC109492534-LOC109497810	109492534-109497810	intergenic_region	109492534-109497810		-1	n.3591928delT
chrA1	3592078	T	G	PASS	G	intergenic_region	MODIFIER	LOC109492534-LOC109497810	109492534-109497810	intergenic_region	109492534-109497810		-1	n.3592078T>G
chrA1	3592823	G	A	PASS	A	intergenic_region	MODIFIER	LOC109492534-LOC109497810	109492534-109497810	intergenic_region	109492534-109497810		-1	n.3592823G>A
chrA1	3600603	T	C	PASS	C	intergenic_region	MODIFIER	LOC109492534-LOC109497810	109492534-109497810	intergenic_region	109492534-109497810		-1	n.3600603T>C
chrA1	3602374	C	G	PASS	G	intergenic_region	MODIFIER	LOC109492534-LOC109497810	109492534-109497810	intergenic_region	109492534-109497810		-1	n.3602374C>G
chrA1	3640103	CTCT	C	PASS	C	intergenic_region	MODIFIER	LOC109492534-LOC109497810	109492534-109497810	intergenic_region	109492534-109497810		-1	n.3640104_3640106delTCT
chrA1	3645928	CA	C	PASS	C	intergenic_region	MODIFIER	LOC109492534-LOC109497810	109492534-109497810	intergenic_region	109492534-109497810		-1	n.3645929delA
chrA1	3649338	C	T	PASS	T	intergenic_region	MODIFIER	LOC109492534-LOC109497810	109492534-109497810	intergenic_region	109492534-109497810		-1	n.3649338C>T
chrA1	3656108	A	G	PASS	G	intergenic_region	MODIFIER	LOC109492534-LOC109497810	109492534-109497810	intergenic_region	109492534-109497810		-1	n.3656108A>G
chrA1	3657980	G	A	PASS	A	intergenic_region	MODIFIER	LOC109492534-LOC109497810	109492534-109497810	intergenic_region	109492534-109497810		-1	n.3657980G>A
chrA1	3660629	T	C	PASS	C	intergenic_region	MODIFIER	LOC109492534-LOC109497810	109492534-109497810	intergenic_region	109492534-109497810		-1	n.3660629T>C
chrA1	3660695	T	C	PASS	C	intergenic_region	MODIFIER	LOC109492534-LOC109497810	109492534-109497810	intergenic_region	109492534-109497810		-1	n.3660695T>C
chrA1	3672048	C	CTT	PASS	CTT	intergenic_region	MODIFIER	LOC109492534-LOC109497810	109492534-109497810	intergenic_region	109492534-109497810		-1	n.3672048_3672049insTT
chrA1	3711722	T	TTA	PASS	TTA	intergenic_region	MODIFIER	LOC109492534-LOC109497810	109492534-109497810	intergenic_region	109492534-109497810		-1	n.3711722_3711723insTA
chrA1	3712254	T	C	PASS	C	intergenic_region	MODIFIER	LOC109492534-LOC109497810	109492534-109497810	intergenic_region	109492534-109497810		-1	n.3712254T>C
chrA1	3712787	C	T	PASS	T	intergenic_region	MODIFIER	LOC109492534-LOC109497810	109492534-109497810	intergenic_region	109492534-109497810		-1	n.3712787C>T
chrA1	3713568	T	C	PASS	C	intergenic_region	MODIFIER	LOC109492534-LOC109497810	109492534-109497810	intergenic_region	109492534-109497810		-1	n.3713568T>C
chrA1	3718247	C	T	PASS	T	intergenic_region	MODIFIER	LOC109492534-LOC109497810	109492534-109497810	intergenic_region	109492534-109497810		-1	n.3718247C>T
chrA1	3726917	G	A	PASS	A	intergenic_region	MODIFIER	LOC109492534-LOC109497810	109492534-109497810	intergenic_region	109492534-109497810		-1	n.3726917G>A
chrA1	3728183	G	A	PASS	A	intergenic_region	MODIFIER	LOC109492534-LOC109497810	109492534-109497810	intergenic_region	109492534-109497810		-1	n.3728183G>A
chrA1	3728194	G	A	PASS	A	intergenic_region	MODIFIER	LOC109492534-LOC109497810	109492534-109497810	intergenic_region	109492534-109497810		-1	n.3728194G>A
chrA1	3753837	C	T	PASS	T	intergenic_region	MODIFIER	LOC109492534-LOC109497810	109492534-109497810	intergenic_region	109492534-109497810		-1	n.3753837C>T
chrA1	3755828	A	G	PASS	G	intergenic_region	MODIFIER	LOC109492534-LOC109497810	109492534-109497810	intergenic_region	109492534-109497810		-1	n.3755828A>G
chrA1	5500888	C	T	PASS	T	intron_variant	MODIFIER	LOC101085594	101085594	transcript	XM_023250034.1	protein_coding	25	c.2384+33855C>T
chrA1	5500888	C	T	PASS	T	intron_variant	MODIFIER	LOC101085594	101085594	transcript	XM_019820987.2	protein_coding	25	c.2264+33855C>T
chrA1	5500888	C	T	PASS	T	intron_variant	MODIFIER	LOC101085594	101085594	transcript	XM_006927173.4	protein_coding	25	c.2264+33855C>T
chrA1	5500888	C	T	PASS	T	intron_variant	MODIFIER	LOC101085594	101085594	transcript	XM_023250050.1	protein_coding	25	c.2384+33855C>T
chrA1	5500888	C	T	PASS	T	intron_variant	MODIFIER	LOC101085594	101085594	transcript	XM_023250035.1	protein_coding	25	c.2384+33855C>T
chrA1	5500888	C	T	PASS	T	intron_variant	MODIFIER	LOC101085594	101085594	transcript	XM_023250041.1	protein_coding	25	c.2384+33855C>T
chrA1	5500888	C	T	PASS	T	intron_variant	MODIFIER	LOC101085594	101085594	transcript	XM_019820599.2	protein_coding	25	c.2348+33855C>T
chrA1	5500888	C	T	PASS	T	intron_variant	MODIFIER	LOC101085594	101085594	transcript	XM_019820927.2	protein_coding	26	c.2264+33855C>T
chrA1	5500888	C	T	PASS	T	intron_variant	MODIFIER	LOC101085594	101085594	transcript	XM_019820968.2	protein_coding	25	c.2264+33855C>T
chrA1	6345528	CCT	C	PASS	C	upstream_gene_variant	MODIFIER	WASF3	101086527	transcript	XM_023250184.1	protein_coding	-1	c.-91884_-91883delCT
chrA1	6345528	CCT	C	PASS	C	upstream_gene_variant	MODIFIER	WASF3	101086527	transcript	XM_023250199.1	protein_coding	-1	c.-91884_-91883delCT
chrA1	6345528	CCT	C	PASS	C	upstream_gene_variant	MODIFIER	WASF3	101086527	transcript	XM_023250152.1	protein_coding	-1	c.-91884_-91883delCT
chrA1	6345528	CCT	C	PASS	C	downstream_gene_variant	MODIFIER	LOC109495885	109495885	transcript	XR_002151607.2	pseudogene	-1	n.*29_*30delAG
chrA1	6345528	CCT	C	PASS	C	intergenic_region	MODIFIER	CDK8-LOC109495885	101086278-109495885	intergenic_region	101086278-109495885		-1	n.6345529_6345530delCT
chrA1	6950543	C	CG	PASS	CG	intron_variant	MODIFIER	LOC102901461	102901461	transcript	XR_002152082.2	pseudogene	3	n.421-2518_421-2517insC
chrA1	6950543	C	CG	PASS	CG	intron_variant	MODIFIER	LOC102901461	102901461	transcript	XR_002152022.2	pseudogene	4	n.560-2518_560-2517insC
chrA1	6950543	C	CG	PASS	CG	intron_variant	MODIFIER	LOC102901461	102901461	transcript	XR_002152051.2	pseudogene	3	n.425-2518_425-2517insC
chrA1	6950543	C	CG	PASS	CG	intron_variant	MODIFIER	LOC102901461	102901461	transcript	XR_002152097.2	pseudogene	2	n.359-2518_359-2517insC
chrA1	6950543	C	CG	PASS	CG	intron_variant	MODIFIER	LOC102901461	102901461	transcript	XR_002152115.2	pseudogene	2	n.363-2518_363-2517insC
chrA1	6950543	C	CG	PASS	CG	intron_variant	MODIFIER	LOC102901461	102901461	transcript	XR_002740452.1	pseudogene	3	n.421-2518_421-2517insC
chrA1	6950543	C	CG	PASS	CG	intron_variant	MODIFIER	LOC102901461	102901461	transcript	XR_439403.4	pseudogene	3	n.421-2518_421-2517insC
chrA1	7107989	CT	C	PASS	C	downstream_gene_variant	MODIFIER	MTIF3	101087290	transcript	XM_006927181.4	protein_coding	-1	c.*4772delA
chrA1	7107989	CT	C	PASS	C	downstream_gene_variant	MODIFIER	MTIF3	101087290	transcript	XM_006927182.4	protein_coding	-1	c.*4772delA
chrA1	7107989	CT	C	PASS	C	downstream_gene_variant	MODIFIER	MTIF3	101087290	transcript	XM_006927183.4	protein_coding	-1	c.*4772delA
chrA1	7107989	CT	C	PASS	C	downstream_gene_variant	MODIFIER	MTIF3	101087290	transcript	XM_003980268.4	protein_coding	-1	c.*4772delA
chrA1	7107989	CT	C	PASS	C	downstream_gene_variant	MODIFIER	MTIF3	101087290	transcript	XM_023250294.1	protein_coding	-1	c.*4977delA
chrA1	7107989	CT	C	PASS	C	intron_variant	MODIFIER	GTF3A	101097776	transcript	XM_011282105.2	protein_coding	4	c.686+418delT
chrA1	7107991	CTCTCTCT	C	PASS	C	downstream_gene_variant	MODIFIER	MTIF3	101087290	transcript	XM_006927181.4	protein_coding	-1	c.*4764_*4770delAGAGAGA
chrA1	7107991	CTCTCTCT	C	PASS	C	downstream_gene_variant	MODIFIER	MTIF3	101087290	transcript	XM_006927182.4	protein_coding	-1	c.*4764_*4770delAGAGAGA
chrA1	7107991	CTCTCTCT	C	PASS	C	downstream_gene_variant	MODIFIER	MTIF3	101087290	transcript	XM_006927183.4	protein_coding	-1	c.*4764_*4770delAGAGAGA
chrA1	7107991	CTCTCTCT	C	PASS	C	downstream_gene_variant	MODIFIER	MTIF3	101087290	transcript	XM_003980268.4	protein_coding	-1	c.*4764_*4770delAGAGAGA
chrA1	7107991	CTCTCTCT	C	PASS	C	downstream_gene_variant	MODIFIER	MTIF3	101087290	transcript	XM_023250294.1	protein_coding	-1	c.*4969_*4975delAGAGAGA
chrA1	7107991	CTCTCTCT	C	PASS	C	intron_variant	MODIFIER	GTF3A	101097776	transcript	XM_011282105.2	protein_coding	4	c.686+420_686+426delTCTCTCT
chrA1	7108016	T	TA	PASS	TA	downstream_gene_variant	MODIFIER	MTIF3	101087290	transcript	XM_006927181.4	protein_coding	-1	c.*4745_*4746insT
chrA1	7108016	T	TA	PASS	TA	downstream_gene_variant	MODIFIER	MTIF3	101087290	transcript	XM_006927182.4	protein_coding	-1	c.*4745_*4746insT
chrA1	7108016	T	TA	PASS	TA	downstream_gene_variant	MODIFIER	MTIF3	101087290	transcript	XM_006927183.4	protein_coding	-1	c.*4745_*4746insT
chrA1	7108016	T	TA	PASS	TA	downstream_gene_variant	MODIFIER	MTIF3	101087290	transcript	XM_003980268.4	protein_coding	-1	c.*4745_*4746insT
chrA1	7108016	T	TA	PASS	TA	downstream_gene_variant	MODIFIER	MTIF3	101087290	transcript	XM_023250294.1	protein_coding	-1	c.*4950_*4951insT
chrA1	7108016	T	TA	PASS	TA	intron_variant	MODIFIER	GTF3A	101097776	transcript	XM_011282105.2	protein_coding	4	c.686+444_686+445insA
chrA1	7108017	CTCCCT	C	PASS	C	downstream_gene_variant	MODIFIER	MTIF3	101087290	transcript	XM_006927181.4	protein_coding	-1	c.*4740_*4744delAGGGA
chrA1	7108017	CTCCCT	C	PASS	C	downstream_gene_variant	MODIFIER	MTIF3	101087290	transcript	XM_006927182.4	protein_coding	-1	c.*4740_*4744delAGGGA
chrA1	7108017	CTCCCT	C	PASS	C	downstream_gene_variant	MODIFIER	MTIF3	101087290	transcript	XM_006927183.4	protein_coding	-1	c.*4740_*4744delAGGGA
chrA1	7108017	CTCCCT	C	PASS	C	downstream_gene_variant	MODIFIER	MTIF3	101087290	transcript	XM_003980268.4	protein_coding	-1	c.*4740_*4744delAGGGA
chrA1	7108017	CTCCCT	C	PASS	C	downstream_gene_variant	MODIFIER	MTIF3	101087290	transcript	XM_023250294.1	protein_coding	-1	c.*4945_*4949delAGGGA
chrA1	7108017	CTCCCT	C	PASS	C	intron_variant	MODIFIER	GTF3A	101097776	transcript	XM_011282105.2	protein_coding	4	c.686+446_686+450delTCCCT
chrA1	7108040	CT	C	PASS	C	downstream_gene_variant	MODIFIER	MTIF3	101087290	transcript	XM_006927181.4	protein_coding	-1	c.*4721delA
chrA1	7108040	CT	C	PASS	C	downstream_gene_variant	MODIFIER	MTIF3	101087290	transcript	XM_006927182.4	protein_coding	-1	c.*4721delA
chrA1	7108040	CT	C	PASS	C	downstream_gene_variant	MODIFIER	MTIF3	101087290	transcript	XM_006927183.4	protein_coding	-1	c.*4721delA
chrA1	7108040	CT	C	PASS	C	downstream_gene_variant	MODIFIER	MTIF3	101087290	transcript	XM_003980268.4	protein_coding	-1	c.*4721delA
chrA1	7108040	CT	C	PASS	C	downstream_gene_variant	MODIFIER	MTIF3	101087290	transcript	XM_023250294.1	protein_coding	-1	c.*4926delA
chrA1	7108040	CT	C	PASS	C	intron_variant	MODIFIER	GTF3A	101097776	transcript	XM_011282105.2	protein_coding	4	c.686+469delT
chrA1	7461484	G	A	PASS	A	intergenic_region	MODIFIER	GSX1-PDX1	101098509-100240682	intergenic_region	101098509-100240682		-1	n.7461484G>A
chrA1	7789092	TCTCTCC	T	PASS	T	intron_variant	MODIFIER	PAN3	101088044	transcript	XM_023250322.1	protein_coding	4	c.697-2974_697-2969delCTCTCC
chrA1	7789092	TCTCTCC	T	PASS	T	intron_variant	MODIFIER	PAN3	101088044	transcript	XM_023250324.1	protein_coding	4	c.697-2974_697-2969delCTCTCC
chrA1	7789092	TCTCTCC	T	PASS	T	intron_variant	MODIFIER	PAN3	101088044	transcript	XM_023250332.1	protein_coding	4	c.696+12499_696+12504delCTCTCC
chrA1	7789092	TCTCTCC	T	PASS	T	intron_variant	MODIFIER	PAN3	101088044	transcript	XM_023250326.1	protein_coding	4	c.697-2974_697-2969delCTCTCC
chrA1	7789092	TCTCTCC	T	PASS	T	intron_variant	MODIFIER	PAN3	101088044	transcript	XM_023250333.1	protein_coding	4	c.696+12499_696+12504delCTCTCC
chrA1	8551701	T	TACAGTGGGTTCAAGCCCCGCATCAGGCTCTGGGCTGACAGCTCAGAGCCTGGAGCCTGCTTCTGATTCTGTG	PASS	TACAGTGGGTTCAAGCCCCGCATCAGGCTCTGGGCTGACAGCTCAGAGCCTGGAGCCTGCTTCTGATTCTGTG	intron_variant	MODIFIER	MTUS2	101088805	transcript	XM_023250373.1	protein_coding	3	c.2209-1903_2209-1902insACAGTGGGTTCAAGCCCCGCATCAGGCTCTGGGCTGACAGCTCAGAGCCTGGAGCCTGCTTCTGATTCTGTG
chrA1	8551701	T	TACAGTGGGTTCAAGCCCCGCATCAGGCTCTGGGCTGACAGCTCAGAGCCTGGAGCCTGCTTCTGATTCTGTG	PASS	TACAGTGGGTTCAAGCCCCGCATCAGGCTCTGGGCTGACAGCTCAGAGCCTGGAGCCTGCTTCTGATTCTGTG	intron_variant	MODIFIER	LOC109496599	109496599	transcript	XR_002152762.2	pseudogene	5	n.560+6625_560+6626insCACAGAATCAGAAGCAGGCTCCAGGCTCTGAGCTGTCAGCCCAGAGCCTGATGCGGGGCTTGAACCCACTGT
chrA1	8551701	T	TACAGTGGGTTCAAGCCCCGCATCAGGCTCTGGGCTGACAGCTCAGAGCCTGGAGCCTGCTTCTGATTCTGTG	PASS	TACAGTGGGTTCAAGCCCCGCATCAGGCTCTGGGCTGACAGCTCAGAGCCTGGAGCCTGCTTCTGATTCTGTG	intron_variant	MODIFIER	MTUS2	101088805	transcript	XM_023250374.1	protein_coding	3	c.2209-1903_2209-1902insACAGTGGGTTCAAGCCCCGCATCAGGCTCTGGGCTGACAGCTCAGAGCCTGGAGCCTGCTTCTGATTCTGTG
chrA1	8551701	T	TACAGTGGGTTCAAGCCCCGCATCAGGCTCTGGGCTGACAGCTCAGAGCCTGGAGCCTGCTTCTGATTCTGTG	PASS	TACAGTGGGTTCAAGCCCCGCATCAGGCTCTGGGCTGACAGCTCAGAGCCTGGAGCCTGCTTCTGATTCTGTG	intron_variant	MODIFIER	LOC109496599	109496599	transcript	XR_002740493.1	pseudogene	3	n.378+6625_378+6626insCACAGAATCAGAAGCAGGCTCCAGGCTCTGAGCTGTCAGCCCAGAGCCTGATGCGGGGCTTGAACCCACTGT
chrA1	9260029	C	CGGGGGGGGGGGGGGG	PASS	CGGGGGGGGGGGGGGG	upstream_gene_variant	MODIFIER	LOC109496855	109496855	transcript	XR_002153061.2	pseudogene	-1	n.-2265_-2264insGGGGGGGGGGGGGGG
chrA1	9260029	C	CGGGGGGGGGGGGGGG	PASS	CGGGGGGGGGGGGGGG	upstream_gene_variant	MODIFIER	LOC109496855	109496855	transcript	XR_002740509.1	pseudogene	-1	n.-2266_-2265insGGGGGGGGGGGGGGG
chrA1	9260029	C	CGGGGGGGGGGGGGGG	PASS	CGGGGGGGGGGGGGGG	intergenic_region	MODIFIER	UBL3-LOC109496855	101089317-109496855	intergenic_region	101089317-109496855		-1	n.9260029_9260030insGGGGGGGGGGGGGGG
chrA1	13755919	A	G	PASS	G	downstream_gene_variant	MODIFIER	LOC109497423	109497423	transcript	XR_002153613.2	pseudogene	-1	n.*2934A>G
chrA1	13755919	A	G	PASS	G	intergenic_region	MODIFIER	LOC109497423-LOC102901791	109497423-102901791	intergenic_region	109497423-102901791		-1	n.13755919A>G
chrA1	13755929	A	G	PASS	G	downstream_gene_variant	MODIFIER	LOC109497423	109497423	transcript	XR_002153613.2	pseudogene	-1	n.*2944A>G
chrA1	13755929	A	G	PASS	G	intergenic_region	MODIFIER	LOC109497423-LOC102901791	109497423-102901791	intergenic_region	109497423-102901791		-1	n.13755929A>G
chrA1	13755938	GAA	G	PASS	G	downstream_gene_variant	MODIFIER	LOC109497423	109497423	transcript	XR_002153613.2	pseudogene	-1	n.*2954_*2955delAA
chrA1	13755938	GAA	G	PASS	G	intergenic_region	MODIFIER	LOC109497423-LOC102901791	109497423-102901791	intergenic_region	109497423-102901791		-1	n.13755939_13755940delAA
chrA1	13755948	G	C	PASS	C	downstream_gene_variant	MODIFIER	LOC109497423	109497423	transcript	XR_002153613.2	pseudogene	-1	n.*2963G>C
chrA1	13755948	G	C	PASS	C	intergenic_region	MODIFIER	LOC109497423-LOC102901791	109497423-102901791	intergenic_region	109497423-102901791		-1	n.13755948G>C
chrA1	13755996	GAGAAGAGAAGAGAAGAGAAGAGAAGAGAAGAGGGA	G	PASS	G	downstream_gene_variant	MODIFIER	LOC109497423	109497423	transcript	XR_002153613.2	pseudogene	-1	n.*3012_*3046delAGAAGAGAAGAGAAGAGAAGAGAAGAGAAGAGGGA
chrA1	13755996	GAGAAGAGAAGAGAAGAGAAGAGAAGAGAAGAGGGA	G	PASS	G	intergenic_region	MODIFIER	LOC109497423-LOC102901791	109497423-102901791	intergenic_region	109497423-102901791		-1	n.13755997_13756031delAGAAGAGAAGAGAAGAGAAGAGAAGAGAAGAGGGA
chrA1	19403462	T	C	PASS	C	intergenic_region	MODIFIER	VPS36-CKAP2	101097120-101097367	intergenic_region	101097120-101097367		-1	n.19403462T>C
chrA1	19404215	T	TA	PASS	TA	upstream_gene_variant	MODIFIER	CKAP2	101097367	transcript	XM_011284205.3	protein_coding	-1	c.-5014_-5013insA
chrA1	19404215	T	TA	PASS	TA	intergenic_region	MODIFIER	VPS36-CKAP2	101097120-101097367	intergenic_region	101097120-101097367		-1	n.19404215_19404216insA
chrA1	19406083	A	G	PASS	G	upstream_gene_variant	MODIFIER	CKAP2	101097367	transcript	XM_011284205.3	protein_coding	-1	c.-3146A>G
chrA1	19406083	A	G	PASS	G	intergenic_region	MODIFIER	VPS36-CKAP2	101097120-101097367	intergenic_region	101097120-101097367		-1	n.19406083A>G
chrA1	19407165	C	G	PASS	G	upstream_gene_variant	MODIFIER	CKAP2	101097367	transcript	XM_011284205.3	protein_coding	-1	c.-2064C>G
chrA1	19407165	C	G	PASS	G	intergenic_region	MODIFIER	VPS36-CKAP2	101097120-101097367	intergenic_region	101097120-101097367		-1	n.19407165C>G
chrA1	19407265	C	T	PASS	T	upstream_gene_variant	MODIFIER	CKAP2	101097367	transcript	XM_011284205.3	protein_coding	-1	c.-1964C>T
chrA1	19407265	C	T	PASS	T	intergenic_region	MODIFIER	VPS36-CKAP2	101097120-101097367	intergenic_region	101097120-101097367		-1	n.19407265C>T
chrA1	19408694	C	CTTT	PASS	CTTT	upstream_gene_variant	MODIFIER	CKAP2	101097367	transcript	XM_011284205.3	protein_coding	-1	c.-535_-534insTTT
chrA1	19408694	C	CTTT	PASS	CTTT	intergenic_region	MODIFIER	VPS36-CKAP2	101097120-101097367	intergenic_region	101097120-101097367		-1	n.19408694_19408695insTTT
chrA1	19410503	T	G	PASS	G	intron_variant	MODIFIER	CKAP2	101097367	transcript	XM_011284205.3	protein_coding	2	c.152+180T>G
chrA1	19459209	C	T	PASS	T	missense_variant	MODERATE	NEK5	101097612	transcript	XM_019825941.2	protein_coding	1	c.35C>T	p.Ala12Val	Visual IGV inspection supports the existence of the variant.
chrA1	19459209	C	T	PASS	T	missense_variant	MODERATE	NEK5	101097612	transcript	XM_019825945.2	protein_coding	1	c.35C>T	p.Ala12Val	Visual IGV inspection supports the existence of the variant.
chrA1	19459209	C	T	PASS	T	upstream_gene_variant	MODIFIER	NEK5	101097612	transcript	XM_019825962.1	protein_coding	-1	c.-1761C>T
chrA1	19459209	C	T	PASS	T	upstream_gene_variant	MODIFIER	NEK5	101097612	transcript	XM_023251202.1	protein_coding	-1	c.-1761C>T
chrA1	19459209	C	T	PASS	T	downstream_gene_variant	MODIFIER	NEK3	102900290	transcript	XM_023251162.1	protein_coding	-1	c.*3266C>T
chrA1	20174864	G	A	PASS	A	intron_variant	MODIFIER	SERPINE3	101098107	transcript	XM_019826076.2	protein_coding	5	c.921-659C>T
chrA1	20174864	G	A	PASS	A	intron_variant	MODIFIER	SERPINE3	101098107	transcript	XM_019826081.2	protein_coding	5	c.888-659C>T
chrA1	20174864	G	A	PASS	A	non_coding_transcript_exon_variant	MODIFIER	LOC109497734	109497734	transcript	XR_002154154.2	pseudogene	4	n.387G>A
chrA1	20174864	G	A	PASS	A	non_coding_transcript_exon_variant	MODIFIER	LOC109497734	109497734	transcript	XR_002740974.1	pseudogene	4	n.387G>A
chrA1	20272521	G	A	PASS	A	downstream_gene_variant	MODIFIER	FAM124A	101098352	transcript	XM_011283724.3	protein_coding	-1	c.*5531C>T
chrA1	20272521	G	A	PASS	A	downstream_gene_variant	MODIFIER	FAM124A	101098352	transcript	XM_023251259.1	protein_coding	-1	c.*5531C>T
chrA1	20272521	G	A	PASS	A	intron_variant	MODIFIER	LOC105260724	105260724	transcript	XR_002740979.1	pseudogene	2	n.323+37G>A
chrA1	20828801	C	G	PASS	G	intergenic_region	MODIFIER	DLEU7-LOC109497901	101099098-109497901	intergenic_region	101099098-109497901		-1	n.20828801C>G
chrA1	20867689	T	C	PASS	C	intergenic_region	MODIFIER	DLEU7-LOC109497901	101099098-109497901	intergenic_region	101099098-109497901		-1	n.20867689T>C
chrA1	21208502	AC	A	PASS	A	intergenic_region	MODIFIER	LOC111556805-LOC111556929	111556805-111556929	intergenic_region	111556805-111556929		-1	n.21208503delC
chrA1	21208528	A	AC	PASS	AC	intergenic_region	MODIFIER	LOC111556805-LOC111556929	111556805-111556929	intergenic_region	111556805-111556929		-1	n.21208528_21208529insC
chrA1	21208892	G	T	PASS	T	intergenic_region	MODIFIER	LOC111556805-LOC111556929	111556805-111556929	intergenic_region	111556805-111556929		-1	n.21208892G>T
chrA1	21919062	A	G	PASS	G	intron_variant	MODIFIER	RCBTB1	101093910	transcript	XM_023251323.1	protein_coding	1	c.-118+3781A>G
chrA1	21919062	A	G	PASS	G	intron_variant	MODIFIER	RCBTB1	101093910	transcript	XM_023251325.1	protein_coding	6	c.-117-13255A>G
chrA1	21919062	A	G	PASS	G	intron_variant	MODIFIER	RCBTB1	101093910	transcript	XM_023251330.1	protein_coding	4	c.-117-13255A>G
chrA1	21919062	A	G	PASS	G	intron_variant	MODIFIER	RCBTB1	101093910	transcript	XM_023251336.1	protein_coding	6	c.-120-13255A>G
chrA1	21919062	A	G	PASS	G	intron_variant	MODIFIER	RCBTB1	101093910	transcript	XM_023251349.1	protein_coding	2	c.-117-13255A>G
chrA1	21919062	A	G	PASS	G	intron_variant	MODIFIER	RCBTB1	101093910	transcript	XM_023251343.1	protein_coding	1	c.-121+3781A>G
chrA1	21919062	A	G	PASS	G	intron_variant	MODIFIER	RCBTB1	101093910	transcript	XM_023251358.1	protein_coding	1	c.-118+3781A>G
chrA1	22833114	TTCTTTCTTTCTTTCTTTCTTTCTTTCTTTCTTTCTTTCTTTCTTTCTTTCTTTCTTTCTTTC	T	PASS	T	intron_variant	MODIFIER	RCBTB2	101095219	transcript	XM_019826356.2	protein_coding	2	c.-23-668_-23-607delTCTTTCTTTCTTTCTTTCTTTCTTTCTTTCTTTCTTTCTTTCTTTCTTTCTTTCTTTCTTTC
chrA1	22833114	TTCTTTCTTTCTTTCTTTCTTTCTTTCTTTCTTTCTTTCTTTCTTTCTTTCTTTCTTTCTTTC	T	PASS	T	intron_variant	MODIFIER	RCBTB2	101095219	transcript	XM_019826359.2	protein_coding	3	c.-23-668_-23-607delTCTTTCTTTCTTTCTTTCTTTCTTTCTTTCTTTCTTTCTTTCTTTCTTTCTTTCTTTCTTTC
chrA1	22833114	TTCTTTCTTTCTTTCTTTCTTTCTTTCTTTCTTTCTTTCTTTCTTTCTTTCTTTCTTTCTTTC	T	PASS	T	intron_variant	MODIFIER	RCBTB2	101095219	transcript	XM_019826368.2	protein_coding	2	c.-23-668_-23-607delTCTTTCTTTCTTTCTTTCTTTCTTTCTTTCTTTCTTTCTTTCTTTCTTTCTTTCTTTCTTTC
chrA1	22833114	TTCTTTCTTTCTTTCTTTCTTTCTTTCTTTCTTTCTTTCTTTCTTTCTTTCTTTCTTTCTTTC	T	PASS	T	intron_variant	MODIFIER	RCBTB2	101095219	transcript	XM_019826374.2	protein_coding	2	c.-23-668_-23-607delTCTTTCTTTCTTTCTTTCTTTCTTTCTTTCTTTCTTTCTTTCTTTCTTTCTTTCTTTCTTTC
chrA1	22833114	TTCTTTCTTTCTTTCTTTCTTTCTTTCTTTCTTTCTTTCTTTCTTTCTTTCTTTCTTTCTTTC	T	PASS	T	intron_variant	MODIFIER	RCBTB2	101095219	transcript	XM_019826377.2	protein_coding	2	c.-31+2304_-31+2365delTCTTTCTTTCTTTCTTTCTTTCTTTCTTTCTTTCTTTCTTTCTTTCTTTCTTTCTTTCTTTC
chrA1	22833114	TTCTTTCTTTCTTTCTTTCTTTCTTTCTTTCTTTCTTTCTTTCTTTCTTTCTTTCTTTCTTTC	T	PASS	T	intron_variant	MODIFIER	RCBTB2	101095219	transcript	XM_019826370.2	protein_coding	2	c.-23-668_-23-607delTCTTTCTTTCTTTCTTTCTTTCTTTCTTTCTTTCTTTCTTTCTTTCTTTCTTTCTTTCTTTC
chrA1	22833114	TTCTTTCTTTCTTTCTTTCTTTCTTTCTTTCTTTCTTTCTTTCTTTCTTTCTTTCTTTCTTTC	T	PASS	T	intron_variant	MODIFIER	RCBTB2	101095219	transcript	XM_019826365.2	protein_coding	2	c.-23-668_-23-607delTCTTTCTTTCTTTCTTTCTTTCTTTCTTTCTTTCTTTCTTTCTTTCTTTCTTTCTTTCTTTC
chrA1	22833114	TTCTTTCTTTCTTTCTTTCTTTCTTTCTTTCTTTCTTTCTTTCTTTCTTTCTTTCTTTCTTTC	T	PASS	T	intron_variant	MODIFIER	RCBTB2	101095219	transcript	XM_023251448.1	protein_coding	3	c.-23-668_-23-607delTCTTTCTTTCTTTCTTTCTTTCTTTCTTTCTTTCTTTCTTTCTTTCTTTCTTTCTTTCTTTC
chrA1	22833114	TTCTTTCTTTCTTTCTTTCTTTCTTTCTTTCTTTCTTTCTTTCTTTCTTTCTTTCTTTCTTTC	T	PASS	T	intron_variant	MODIFIER	RCBTB2	101095219	transcript	XM_019826361.2	protein_coding	2	c.-23-668_-23-607delTCTTTCTTTCTTTCTTTCTTTCTTTCTTTCTTTCTTTCTTTCTTTCTTTCTTTCTTTCTTTC
chrA1	22833114	TTCTTTCTTTCTTTCTTTCTTTCTTTCTTTCTTTCTTTCTTTCTTTCTTTCTTTCTTTCTTTC	T	PASS	T	intron_variant	MODIFIER	RCBTB2	101095219	transcript	XM_019826383.2	protein_coding	2	c.-31+2304_-31+2365delTCTTTCTTTCTTTCTTTCTTTCTTTCTTTCTTTCTTTCTTTCTTTCTTTCTTTCTTTCTTTC
chrA1	22870197	G	A	PASS	A	intron_variant	MODIFIER	RB1	101101356	transcript	XM_023251429.1	protein_coding	24	c.2526+223C>T
chrA1	22870197	G	A	PASS	A	intron_variant	MODIFIER	RB1	101101356	transcript	XM_023251440.1	protein_coding	23	c.2196+223C>T
chrA1	22870197	G	A	PASS	A	intron_variant	MODIFIER	RB1	101101356	transcript	XM_023251437.1	protein_coding	24	c.2526+223C>T
chrA1	23145415	G	A	PASS	A	intergenic_region	MODIFIER	ITM2B-LOC111556911	101101607-111556911	intergenic_region	101101607-111556911		-1	n.23145415G>A
chrA1	23243563	C	T	PASS	T	downstream_gene_variant	MODIFIER	MED4	101095871	transcript	XM_003980375.5	protein_coding	-1	c.*526C>T
chrA1	23243563	C	T	PASS	T	downstream_gene_variant	MODIFIER	MED4	101095871	transcript	XM_019826448.1	protein_coding	-1	c.*526C>T
chrA1	23243563	C	T	PASS	T	intergenic_region	MODIFIER	MED4-NUDT15	101095871-101096127	intergenic_region	101095871-101096127		-1	n.23243563C>T
chrA1	23348057	G	A	PASS	A	intergenic_region	MODIFIER	SUCLA2-LOC109497998	101096373-109497998	intergenic_region	101096373-109497998		-1	n.23348057G>A
chrA1	24387361	G	GTTCAAATGTTACATGTTTTCATATCAGCCATCTATATAAGAAAATAAGCCAAA	PASS	GTTCAAATGTTACATGTTTTCATATCAGCCATCTATATAAGAAAATAAGCCAAA	intron_variant	MODIFIER	LOC109498005	109498005	transcript	XR_002154541.2	pseudogene	2	n.300+5650_300+5651insTTTGGCTTATTTTCTTATATAGATGGCTGATATGAAAACATGTAACATTTGAA
chrA1	24814196	T	C	PASS	C	intron_variant	MODIFIER	LRRC63	102899708	transcript	XM_019826586.2	protein_coding	9	c.1424+1039A>G
chrA1	24814196	T	C	PASS	C	intron_variant	MODIFIER	LRRC63	102899708	transcript	XM_019826608.2	protein_coding	8	c.1325+1039A>G
chrA1	24814196	T	C	PASS	C	intron_variant	MODIFIER	LRRC63	102899708	transcript	XM_019826612.2	protein_coding	7	c.1226+1039A>G
chrA1	24814196	T	C	PASS	C	intron_variant	MODIFIER	LRRC63	102899708	transcript	XM_019826597.2	protein_coding	9	c.1424+1039A>G
chrA1	24814196	T	C	PASS	C	intron_variant	MODIFIER	LRRC63	102899708	transcript	XM_019826605.2	protein_coding	8	c.1341-2221A>G
chrA1	24899278	T	A	PASS	A	intron_variant	MODIFIER	LCP1	101081857	transcript	XM_003980396.5	protein_coding	1	c.-23-2827T>A
chrA1	24944916	G	A	PASS	A	downstream_gene_variant	MODIFIER	LOC109498029	109498029	transcript	XR_002740864.1	pseudogene	-1	n.*3067C>T
chrA1	24944916	G	A	PASS	A	intergenic_region	MODIFIER	LCP1-LOC109498029	101081857-109498029	intergenic_region	101081857-109498029		-1	n.24944916G>A
chrA1	25115616	T	C	PASS	C	intergenic_region	MODIFIER	ZC3H13-LOC109498060	101082368-109498060	intergenic_region	101082368-109498060		-1	n.25115616T>C
chrA1	25651337	G	A	PASS	A	intergenic_region	MODIFIER	LOC111557014-LOC109498077	111557014-109498077	intergenic_region	111557014-109498077		-1	n.25651337G>A
chrA1	25651338	G	A	PASS	A	intergenic_region	MODIFIER	LOC111557014-LOC109498077	111557014-109498077	intergenic_region	111557014-109498077		-1	n.25651338G>A
chrA1	26229558	C	T	PASS	T	intergenic_region	MODIFIER	LOC111559826-LOC109498105	111559826-109498105	intergenic_region	111559826-109498105		-1	n.26229558C>T
chrA1	26249537	C	T	PASS	T	intergenic_region	MODIFIER	LOC111559826-LOC109498105	111559826-109498105	intergenic_region	111559826-109498105		-1	n.26249537C>T
chrA1	26271793	C	T	PASS	T	intergenic_region	MODIFIER	LOC111559826-LOC109498105	111559826-109498105	intergenic_region	111559826-109498105		-1	n.26271793C>T
chrA1	26317320	T	C	PASS	C	intron_variant	MODIFIER	TSC22D1	101085595	transcript	XM_023251721.1	protein_coding	2	c.3264-12794T>C
chrA1	26317320	T	C	PASS	C	intron_variant	MODIFIER	TSC22D1	101085595	transcript	XM_023251724.1	protein_coding	2	c.3264-12794T>C
chrA1	26317320	T	C	PASS	C	intron_variant	MODIFIER	TSC22D1	101085595	transcript	XM_023251725.1	protein_coding	2	c.3264-12794T>C
chrA1	26317320	T	C	PASS	C	intron_variant	MODIFIER	TSC22D1	101085595	transcript	XR_002741163.1	pseudogene	2	n.3980-12781T>C
chrA1	26317320	T	C	PASS	C	intron_variant	MODIFIER	TSC22D1	101085595	transcript	XR_002741165.1	pseudogene	2	n.3980-12781T>C
chrA1	26317320	T	C	PASS	C	intron_variant	MODIFIER	TSC22D1	101085595	transcript	XM_023251728.1	protein_coding	2	c.2883-12794T>C
chrA1	26317320	T	C	PASS	C	intron_variant	MODIFIER	TSC22D1	101085595	transcript	XM_011291259.3	protein_coding	1	c.2882+16627T>C
chrA1	26719396	C	T	PASS	T	intron_variant	MODIFIER	LOC102900805	102900805	transcript	XR_002741179.1	pseudogene	1	n.391-2172C>T
chrA1	26719396	C	T	PASS	T	intron_variant	MODIFIER	LOC102900805	102900805	transcript	XR_002741181.1	pseudogene	1	n.391-2172C>T
chrA1	26719396	C	T	PASS	T	intron_variant	MODIFIER	LOC102900805	102900805	transcript	XR_002154752.2	pseudogene	1	n.391-2172C>T
chrA1	26719396	C	T	PASS	T	intron_variant	MODIFIER	LOC102900805	102900805	transcript	XR_002154754.2	pseudogene	1	n.390-2172C>T
chrA1	26719396	C	T	PASS	T	intron_variant	MODIFIER	LOC102900805	102900805	transcript	XR_002154753.2	pseudogene	1	n.390-2172C>T
chrA1	26719396	C	T	PASS	T	intron_variant	MODIFIER	LOC102900805	102900805	transcript	XR_002154751.2	pseudogene	1	n.390-2172C>T
chrA1	26719396	C	T	PASS	T	intron_variant	MODIFIER	LOC102900805	102900805	transcript	XR_002154750.2	pseudogene	1	n.390-2172C>T
chrA1	27253465	A	G	PASS	G	intron_variant	MODIFIER	ENOX1	101089320	transcript	XM_019827068.2	protein_coding	3	c.-204+57408A>G
chrA1	27253465	A	G	PASS	G	intron_variant	MODIFIER	ENOX1	101089320	transcript	XM_023251831.1	protein_coding	4	c.-204+57408A>G
chrA1	27253465	A	G	PASS	G	intron_variant	MODIFIER	ENOX1	101089320	transcript	XM_023251825.1	protein_coding	4	c.-204+57408A>G
chrA1	27253465	A	G	PASS	G	intron_variant	MODIFIER	ENOX1	101089320	transcript	XM_023251835.1	protein_coding	4	c.-204+57408A>G
chrA1	27253465	A	G	PASS	G	intron_variant	MODIFIER	ENOX1	101089320	transcript	XM_019827075.2	protein_coding	2	c.-203-58100A>G
chrA1	27253465	A	G	PASS	G	intron_variant	MODIFIER	ENOX1	101089320	transcript	XM_023251799.1	protein_coding	4	c.-204+57408A>G
chrA1	27253465	A	G	PASS	G	intron_variant	MODIFIER	ENOX1	101089320	transcript	XM_023251815.1	protein_coding	4	c.-204+57408A>G
chrA1	27253465	A	G	PASS	G	intron_variant	MODIFIER	ENOX1	101089320	transcript	XM_023251820.1	protein_coding	4	c.-204+57408A>G
chrA1	27253465	A	G	PASS	G	intron_variant	MODIFIER	ENOX1	101089320	transcript	XM_023251828.1	protein_coding	4	c.-204+57408A>G
chrA1	27253465	A	G	PASS	G	intron_variant	MODIFIER	ENOX1	101089320	transcript	XM_023251834.1	protein_coding	4	c.-276+57408A>G
chrA1	27253465	A	G	PASS	G	intron_variant	MODIFIER	ENOX1	101089320	transcript	XM_023251807.1	protein_coding	4	c.-204+57408A>G
chrA1	27370086	G	A	PASS	A	intron_variant	MODIFIER	ENOX1	101089320	transcript	XM_019827068.2	protein_coding	5	c.89-6431G>A
chrA1	27370086	G	A	PASS	A	intron_variant	MODIFIER	ENOX1	101089320	transcript	XM_023251831.1	protein_coding	6	c.89-6431G>A
chrA1	27370086	G	A	PASS	A	intron_variant	MODIFIER	ENOX1	101089320	transcript	XM_023251825.1	protein_coding	6	c.89-6431G>A
chrA1	27370086	G	A	PASS	A	intron_variant	MODIFIER	ENOX1	101089320	transcript	XM_023251835.1	protein_coding	6	c.89-6431G>A
chrA1	27370086	G	A	PASS	A	intron_variant	MODIFIER	ENOX1	101089320	transcript	XM_019827075.2	protein_coding	4	c.89-6431G>A
chrA1	27370086	G	A	PASS	A	intron_variant	MODIFIER	ENOX1	101089320	transcript	XM_023251799.1	protein_coding	6	c.89-6431G>A
chrA1	27370086	G	A	PASS	A	intron_variant	MODIFIER	ENOX1	101089320	transcript	XM_023251815.1	protein_coding	6	c.89-6431G>A
chrA1	27370086	G	A	PASS	A	intron_variant	MODIFIER	ENOX1	101089320	transcript	XM_023251820.1	protein_coding	6	c.89-6431G>A
chrA1	27370086	G	A	PASS	A	intron_variant	MODIFIER	ENOX1	101089320	transcript	XM_023251828.1	protein_coding	6	c.89-6431G>A
chrA1	27370086	G	A	PASS	A	intron_variant	MODIFIER	ENOX1	101089320	transcript	XM_023251834.1	protein_coding	5	c.-131-6431G>A
chrA1	27370086	G	A	PASS	A	intron_variant	MODIFIER	ENOX1	101089320	transcript	XM_023251807.1	protein_coding	6	c.89-6431G>A
chrA1	27378417	G	A	PASS	A	intron_variant	MODIFIER	ENOX1	101089320	transcript	XM_019827068.2	protein_coding	7	c.370+756G>A
chrA1	27378417	G	A	PASS	A	intron_variant	MODIFIER	ENOX1	101089320	transcript	XM_023251831.1	protein_coding	8	c.370+756G>A
chrA1	27378417	G	A	PASS	A	intron_variant	MODIFIER	ENOX1	101089320	transcript	XM_023251825.1	protein_coding	8	c.370+756G>A
chrA1	27378417	G	A	PASS	A	intron_variant	MODIFIER	ENOX1	101089320	transcript	XM_023251835.1	protein_coding	8	c.370+756G>A
chrA1	27378417	G	A	PASS	A	intron_variant	MODIFIER	ENOX1	101089320	transcript	XM_019827075.2	protein_coding	6	c.370+756G>A
chrA1	27378417	G	A	PASS	A	intron_variant	MODIFIER	ENOX1	101089320	transcript	XM_023251799.1	protein_coding	8	c.370+756G>A
chrA1	27378417	G	A	PASS	A	intron_variant	MODIFIER	ENOX1	101089320	transcript	XM_023251815.1	protein_coding	8	c.367+756G>A
chrA1	27378417	G	A	PASS	A	intron_variant	MODIFIER	ENOX1	101089320	transcript	XM_023251820.1	protein_coding	8	c.370+756G>A
chrA1	27378417	G	A	PASS	A	intron_variant	MODIFIER	ENOX1	101089320	transcript	XM_023251828.1	protein_coding	8	c.370+756G>A
chrA1	27378417	G	A	PASS	A	intron_variant	MODIFIER	ENOX1	101089320	transcript	XM_023251834.1	protein_coding	7	c.151+756G>A
chrA1	27378417	G	A	PASS	A	intron_variant	MODIFIER	ENOX1	101089320	transcript	XM_023251807.1	protein_coding	8	c.370+756G>A
chrA1	27378920	G	GTATATA	PASS	GTATATA	intron_variant	MODIFIER	ENOX1	101089320	transcript	XM_019827068.2	protein_coding	7	c.370+1259_370+1260insTATATA
chrA1	27378920	G	GTATATA	PASS	GTATATA	intron_variant	MODIFIER	ENOX1	101089320	transcript	XM_023251831.1	protein_coding	8	c.370+1259_370+1260insTATATA
chrA1	27378920	G	GTATATA	PASS	GTATATA	intron_variant	MODIFIER	ENOX1	101089320	transcript	XM_023251825.1	protein_coding	8	c.370+1259_370+1260insTATATA
chrA1	27378920	G	GTATATA	PASS	GTATATA	intron_variant	MODIFIER	ENOX1	101089320	transcript	XM_023251835.1	protein_coding	8	c.370+1259_370+1260insTATATA
chrA1	27378920	G	GTATATA	PASS	GTATATA	intron_variant	MODIFIER	ENOX1	101089320	transcript	XM_019827075.2	protein_coding	6	c.370+1259_370+1260insTATATA
chrA1	27378920	G	GTATATA	PASS	GTATATA	intron_variant	MODIFIER	ENOX1	101089320	transcript	XM_023251799.1	protein_coding	8	c.370+1259_370+1260insTATATA
chrA1	27378920	G	GTATATA	PASS	GTATATA	intron_variant	MODIFIER	ENOX1	101089320	transcript	XM_023251815.1	protein_coding	8	c.367+1259_367+1260insTATATA
chrA1	27378920	G	GTATATA	PASS	GTATATA	intron_variant	MODIFIER	ENOX1	101089320	transcript	XM_023251820.1	protein_coding	8	c.370+1259_370+1260insTATATA
chrA1	27378920	G	GTATATA	PASS	GTATATA	intron_variant	MODIFIER	ENOX1	101089320	transcript	XM_023251828.1	protein_coding	8	c.370+1259_370+1260insTATATA
chrA1	27378920	G	GTATATA	PASS	GTATATA	intron_variant	MODIFIER	ENOX1	101089320	transcript	XM_023251834.1	protein_coding	7	c.151+1259_151+1260insTATATA
chrA1	27378920	G	GTATATA	PASS	GTATATA	intron_variant	MODIFIER	ENOX1	101089320	transcript	XM_023251807.1	protein_coding	8	c.370+1259_370+1260insTATATA
chrA1	27407544	T	G	PASS	G	intron_variant	MODIFIER	ENOX1	101089320	transcript	XM_019827068.2	protein_coding	7	c.371-20007T>G
chrA1	27407544	T	G	PASS	G	intron_variant	MODIFIER	ENOX1	101089320	transcript	XM_023251831.1	protein_coding	8	c.371-20007T>G
chrA1	27407544	T	G	PASS	G	intron_variant	MODIFIER	ENOX1	101089320	transcript	XM_023251825.1	protein_coding	8	c.371-20007T>G
chrA1	27407544	T	G	PASS	G	intron_variant	MODIFIER	ENOX1	101089320	transcript	XM_023251835.1	protein_coding	8	c.371-20025T>G
chrA1	27407544	T	G	PASS	G	intron_variant	MODIFIER	ENOX1	101089320	transcript	XM_019827075.2	protein_coding	6	c.371-20007T>G
chrA1	27407544	T	G	PASS	G	intron_variant	MODIFIER	ENOX1	101089320	transcript	XM_023251799.1	protein_coding	8	c.371-20007T>G
chrA1	27407544	T	G	PASS	G	intron_variant	MODIFIER	ENOX1	101089320	transcript	XM_023251815.1	protein_coding	8	c.368-20007T>G
chrA1	27407544	T	G	PASS	G	intron_variant	MODIFIER	ENOX1	101089320	transcript	XM_023251820.1	protein_coding	8	c.371-20025T>G
chrA1	27407544	T	G	PASS	G	intron_variant	MODIFIER	ENOX1	101089320	transcript	XM_023251828.1	protein_coding	8	c.371-20007T>G
chrA1	27407544	T	G	PASS	G	intron_variant	MODIFIER	ENOX1	101089320	transcript	XM_023251834.1	protein_coding	7	c.152-20007T>G
chrA1	27407544	T	G	PASS	G	intron_variant	MODIFIER	ENOX1	101089320	transcript	XM_023251807.1	protein_coding	8	c.371-20007T>G
chrA1	27415412	G	A	PASS	A	intron_variant	MODIFIER	ENOX1	101089320	transcript	XM_019827068.2	protein_coding	7	c.371-12139G>A
chrA1	27415412	G	A	PASS	A	intron_variant	MODIFIER	ENOX1	101089320	transcript	XM_023251831.1	protein_coding	8	c.371-12139G>A
chrA1	27415412	G	A	PASS	A	intron_variant	MODIFIER	ENOX1	101089320	transcript	XM_023251825.1	protein_coding	8	c.371-12139G>A
chrA1	27415412	G	A	PASS	A	intron_variant	MODIFIER	ENOX1	101089320	transcript	XM_023251835.1	protein_coding	8	c.371-12157G>A
chrA1	27415412	G	A	PASS	A	intron_variant	MODIFIER	ENOX1	101089320	transcript	XM_019827075.2	protein_coding	6	c.371-12139G>A
chrA1	27415412	G	A	PASS	A	intron_variant	MODIFIER	ENOX1	101089320	transcript	XM_023251799.1	protein_coding	8	c.371-12139G>A
chrA1	27415412	G	A	PASS	A	intron_variant	MODIFIER	ENOX1	101089320	transcript	XM_023251815.1	protein_coding	8	c.368-12139G>A
chrA1	27415412	G	A	PASS	A	intron_variant	MODIFIER	ENOX1	101089320	transcript	XM_023251820.1	protein_coding	8	c.371-12157G>A
chrA1	27415412	G	A	PASS	A	intron_variant	MODIFIER	ENOX1	101089320	transcript	XM_023251828.1	protein_coding	8	c.371-12139G>A
chrA1	27415412	G	A	PASS	A	intron_variant	MODIFIER	ENOX1	101089320	transcript	XM_023251834.1	protein_coding	7	c.152-12139G>A
chrA1	27415412	G	A	PASS	A	intron_variant	MODIFIER	ENOX1	101089320	transcript	XM_023251807.1	protein_coding	8	c.371-12139G>A
chrA1	27431662	C	T	PASS	T	intron_variant	MODIFIER	ENOX1	101089320	transcript	XM_019827068.2	protein_coding	9	c.752-1485C>T
chrA1	27431662	C	T	PASS	T	intron_variant	MODIFIER	ENOX1	101089320	transcript	XM_023251831.1	protein_coding	10	c.752-1485C>T
chrA1	27431662	C	T	PASS	T	intron_variant	MODIFIER	ENOX1	101089320	transcript	XM_023251825.1	protein_coding	10	c.752-1485C>T
chrA1	27431662	C	T	PASS	T	intron_variant	MODIFIER	ENOX1	101089320	transcript	XM_023251835.1	protein_coding	10	c.734-1485C>T
chrA1	27431662	C	T	PASS	T	intron_variant	MODIFIER	ENOX1	101089320	transcript	XM_019827075.2	protein_coding	8	c.752-1485C>T
chrA1	27431662	C	T	PASS	T	intron_variant	MODIFIER	ENOX1	101089320	transcript	XM_023251799.1	protein_coding	10	c.752-1485C>T
chrA1	27431662	C	T	PASS	T	intron_variant	MODIFIER	ENOX1	101089320	transcript	XM_023251815.1	protein_coding	10	c.749-1485C>T
chrA1	27431662	C	T	PASS	T	intron_variant	MODIFIER	ENOX1	101089320	transcript	XM_023251820.1	protein_coding	10	c.734-1485C>T
chrA1	27431662	C	T	PASS	T	intron_variant	MODIFIER	ENOX1	101089320	transcript	XM_023251828.1	protein_coding	10	c.752-1485C>T
chrA1	27431662	C	T	PASS	T	intron_variant	MODIFIER	ENOX1	101089320	transcript	XM_023251834.1	protein_coding	9	c.533-1485C>T
chrA1	27431662	C	T	PASS	T	intron_variant	MODIFIER	ENOX1	101089320	transcript	XM_023251807.1	protein_coding	10	c.752-1485C>T
chrA1	27886466	T	C	PASS	C	intron_variant	MODIFIER	EPSTI1	101089570	transcript	XM_011290734.3	protein_coding	9	c.765+4637T>C
chrA1	27886466	T	C	PASS	C	intron_variant	MODIFIER	EPSTI1	101089570	transcript	XM_023251861.1	protein_coding	7	c.648+15265T>C
chrA1	27886466	T	C	PASS	C	intron_variant	MODIFIER	EPSTI1	101089570	transcript	XM_006927315.4	protein_coding	8	c.732+4637T>C
chrA1	28052772	C	A	PASS	A	intergenic_region	MODIFIER	FAM216B-LOC109498172	101089826-109498172	intergenic_region	101089826-109498172		-1	n.28052772C>A
chrA1	28117675	G	C	PASS	C	intergenic_region	MODIFIER	FAM216B-LOC109498172	101089826-109498172	intergenic_region	101089826-109498172		-1	n.28117675G>C
chrA1	28157181	G	T	PASS	T	intron_variant	MODIFIER	LOC109498172	109498172	transcript	XR_002741201.1	pseudogene	2	n.1102+6607G>T
chrA1	28157181	G	T	PASS	T	intron_variant	MODIFIER	LOC109498172	109498172	transcript	XR_002741202.1	pseudogene	2	n.1102+6607G>T
chrA1	28231009	TGGCCAC	T	PASS	T	intergenic_region	MODIFIER	TNFSF11-AKAP11	724036-101087548	intergenic_region	724036-101087548		-1	n.28231010_28231015delGGCCAC
chrA1	28795348	C	T	PASS	T	intron_variant	MODIFIER	VWA8	101090073	transcript	XM_023260078.1	protein_coding	2	c.242-7146C>T
chrA1	28855621	C	T	PASS	T	intron_variant	MODIFIER	VWA8	101090073	transcript	XM_023260078.1	protein_coding	12	c.1425+8106C>T
chrA1	30216206	A	T	PASS	T	intergenic_region	MODIFIER	LOC102901843-LOC111556289	102901843-111556289	intergenic_region	102901843-111556289		-1	n.30216206A>T
chrA1	30499383	C	G	PASS	G	intergenic_region	MODIFIER	LOC111559868-LOC101089069	111559868-101089069	intergenic_region	111559868-101089069		-1	n.30499383C>G
chrA1	30750041	T	TGATGCATCTTTAGTTAGCTAATCAAGACATAGGACAAAATA	PASS	TGATGCATCTTTAGTTAGCTAATCAAGACATAGGACAAAATA	intergenic_region	MODIFIER	LOC111559868-LOC101089069	111559868-101089069	intergenic_region	111559868-101089069		-1	n.30750041_30750042insGATGCATCTTTAGTTAGCTAATCAAGACATAGGACAAAATA
chrA1	31448299	C	T	PASS	T	intergenic_region	MODIFIER	LOC101092819-LOC111556986	101092819-111556986	intergenic_region	101092819-111556986		-1	n.31448299C>T
chrA1	31457470	A	G	PASS	G	intergenic_region	MODIFIER	LOC101092819-LOC111556986	101092819-111556986	intergenic_region	101092819-111556986		-1	n.31457470A>G
chrA1	31486855	C	CG	PASS	CG	intergenic_region	MODIFIER	LOC101092819-LOC111556986	101092819-111556986	intergenic_region	101092819-111556986		-1	n.31486855_31486856insG
chrA1	31486856	TCTCTCTCTCTCTCTCTCTCTCTCTCTCTC	T	PASS	T	intergenic_region	MODIFIER	LOC101092819-LOC111556986	101092819-111556986	intergenic_region	101092819-111556986		-1	n.31486857_31486885delCTCTCTCTCTCTCTCTCTCTCTCTCTCTC
chrA1	31490092	A	C	PASS	C	intergenic_region	MODIFIER	LOC101092819-LOC111556986	101092819-111556986	intergenic_region	101092819-111556986		-1	n.31490092A>C
chrA1	31490103	T	G	PASS	G	intergenic_region	MODIFIER	LOC101092819-LOC111556986	101092819-111556986	intergenic_region	101092819-111556986		-1	n.31490103T>G
chrA1	31494902	C	A	PASS	A	intergenic_region	MODIFIER	LOC101092819-LOC111556986	101092819-111556986	intergenic_region	101092819-111556986		-1	n.31494902C>A
chrA1	31495548	A	G	PASS	G	intergenic_region	MODIFIER	LOC101092819-LOC111556986	101092819-111556986	intergenic_region	101092819-111556986		-1	n.31495548A>G
chrA1	31505459	C	A	PASS	A	intergenic_region	MODIFIER	LOC101092819-LOC111556986	101092819-111556986	intergenic_region	101092819-111556986		-1	n.31505459C>A
chrA1	31505545	G	A	PASS	A	intergenic_region	MODIFIER	LOC101092819-LOC111556986	101092819-111556986	intergenic_region	101092819-111556986		-1	n.31505545G>A
chrA1	31505640	T	A	PASS	A	intergenic_region	MODIFIER	LOC101092819-LOC111556986	101092819-111556986	intergenic_region	101092819-111556986		-1	n.31505640T>A
chrA1	31507655	C	T	PASS	T	intergenic_region	MODIFIER	LOC101092819-LOC111556986	101092819-111556986	intergenic_region	101092819-111556986		-1	n.31507655C>T
chrA1	31564286	G	A	PASS	A	intergenic_region	MODIFIER	LOC111556986-LOC109492563	111556986-109492563	intergenic_region	111556986-109492563		-1	n.31564286G>A
chrA1	31568617	C	T	PASS	T	intergenic_region	MODIFIER	LOC111556986-LOC109492563	111556986-109492563	intergenic_region	111556986-109492563		-1	n.31568617C>T
chrA1	31590180	G	A	PASS	A	intergenic_region	MODIFIER	LOC111556986-LOC109492563	111556986-109492563	intergenic_region	111556986-109492563		-1	n.31590180G>A
chrA1	31952310	GGAAGGAAGGAAGGAAGGAAGGAAGAAA	G	PASS	G	intergenic_region	MODIFIER	LOC109498248-LOC109498249	109498248-109498249	intergenic_region	109498248-109498249		-1	n.31952311_31952337delGAAGGAAGGAAGGAAGGAAGGAAGAAA
chrA1	32169146	A	C	PASS	C	upstream_gene_variant	MODIFIER	LOC111556987	111556987	transcript	XR_002736703.1	pseudogene	-1	n.-4976T>G
chrA1	32169146	A	C	PASS	C	intergenic_region	MODIFIER	LOC111556987-LOC111556764	111556987-111556764	intergenic_region	111556987-111556764		-1	n.32169146A>C
chrA1	32232744	GGGAGGGAA	G	PASS	G	intergenic_region	MODIFIER	LOC111556987-LOC111556764	111556987-111556764	intergenic_region	111556987-111556764		-1	n.32232745_32232752delGGAGGGAA
chrA1	32241801	A	AT	PASS	AT	intergenic_region	MODIFIER	LOC111556987-LOC111556764	111556987-111556764	intergenic_region	111556987-111556764		-1	n.32241801_32241802insT
chrA1	32256150	A	ACATCTAATGT	PASS	ACATCTAATGT	intergenic_region	MODIFIER	LOC111556987-LOC111556764	111556987-111556764	intergenic_region	111556987-111556764		-1	n.32256150_32256151insCATCTAATGT
chrA1	32300386	G	A	PASS	A	intergenic_region	MODIFIER	LOC111556987-LOC111556764	111556987-111556764	intergenic_region	111556987-111556764		-1	n.32300386G>A
chrA1	32307515	A	G	PASS	G	intergenic_region	MODIFIER	LOC111556987-LOC111556764	111556987-111556764	intergenic_region	111556987-111556764		-1	n.32307515A>G
chrA1	32309369	AGTGATGATTTTC	A	PASS	A	intergenic_region	MODIFIER	LOC111556987-LOC111556764	111556987-111556764	intergenic_region	111556987-111556764		-1	n.32309370_32309381delGTGATGATTTTC
chrA1	32309846	G	A	PASS	A	intergenic_region	MODIFIER	LOC111556987-LOC111556764	111556987-111556764	intergenic_region	111556987-111556764		-1	n.32309846G>A
chrA1	32316099	T	C	PASS	C	intergenic_region	MODIFIER	LOC111556987-LOC111556764	111556987-111556764	intergenic_region	111556987-111556764		-1	n.32316099T>C
chrA1	32316779	C	CATT	PASS	CATT	intergenic_region	MODIFIER	LOC111556987-LOC111556764	111556987-111556764	intergenic_region	111556987-111556764		-1	n.32316779_32316780insATT
chrA1	32318914	T	A	PASS	A	intergenic_region	MODIFIER	LOC111556987-LOC111556764	111556987-111556764	intergenic_region	111556987-111556764		-1	n.32318914T>A
chrA1	32319333	C	T	PASS	T	intergenic_region	MODIFIER	LOC111556987-LOC111556764	111556987-111556764	intergenic_region	111556987-111556764		-1	n.32319333C>T
chrA1	32321471	TTC	T	PASS	T	intergenic_region	MODIFIER	LOC111556987-LOC111556764	111556987-111556764	intergenic_region	111556987-111556764		-1	n.32321472_32321473delTC
chrA1	32323239	C	T	PASS	T	intergenic_region	MODIFIER	LOC111556987-LOC111556764	111556987-111556764	intergenic_region	111556987-111556764		-1	n.32323239C>T
chrA1	32323254	TACA	T	PASS	T	intergenic_region	MODIFIER	LOC111556987-LOC111556764	111556987-111556764	intergenic_region	111556987-111556764		-1	n.32323255_32323257delACA
chrA1	32323258	A	ATG	PASS	ATG	intergenic_region	MODIFIER	LOC111556987-LOC111556764	111556987-111556764	intergenic_region	111556987-111556764		-1	n.32323258_32323259insTG
chrA1	32323269	C	T	PASS	T	intergenic_region	MODIFIER	LOC111556987-LOC111556764	111556987-111556764	intergenic_region	111556987-111556764		-1	n.32323269C>T
chrA1	32323993	G	A	PASS	A	intergenic_region	MODIFIER	LOC111556987-LOC111556764	111556987-111556764	intergenic_region	111556987-111556764		-1	n.32323993G>A
chrA1	32324007	G	A	PASS	A	intergenic_region	MODIFIER	LOC111556987-LOC111556764	111556987-111556764	intergenic_region	111556987-111556764		-1	n.32324007G>A
chrA1	32324077	G	C	PASS	C	intergenic_region	MODIFIER	LOC111556987-LOC111556764	111556987-111556764	intergenic_region	111556987-111556764		-1	n.32324077G>C
chrA1	32325527	A	AATTG	PASS	AATTG	intergenic_region	MODIFIER	LOC111556987-LOC111556764	111556987-111556764	intergenic_region	111556987-111556764		-1	n.32325527_32325528insATTG
chrA1	32326442	TCC	T	PASS	T	intergenic_region	MODIFIER	LOC111556987-LOC111556764	111556987-111556764	intergenic_region	111556987-111556764		-1	n.32326443_32326444delCC
chrA1	32326446	C	CTGTT	PASS	CTGTT	intergenic_region	MODIFIER	LOC111556987-LOC111556764	111556987-111556764	intergenic_region	111556987-111556764		-1	n.32326446_32326447insTGTT
chrA1	32326448	G	GGAAAAACT	PASS	GGAAAAACT	intergenic_region	MODIFIER	LOC111556987-LOC111556764	111556987-111556764	intergenic_region	111556987-111556764		-1	n.32326448_32326449insGAAAAACT
chrA1	32327946	G	A	PASS	A	intergenic_region	MODIFIER	LOC111556987-LOC111556764	111556987-111556764	intergenic_region	111556987-111556764		-1	n.32327946G>A
chrA1	32327965	G	A	PASS	A	intergenic_region	MODIFIER	LOC111556987-LOC111556764	111556987-111556764	intergenic_region	111556987-111556764		-1	n.32327965G>A
chrA1	32328147	G	A	PASS	A	intergenic_region	MODIFIER	LOC111556987-LOC111556764	111556987-111556764	intergenic_region	111556987-111556764		-1	n.32328147G>A
chrA1	32333512	C	T	PASS	T	intergenic_region	MODIFIER	LOC111556987-LOC111556764	111556987-111556764	intergenic_region	111556987-111556764		-1	n.32333512C>T
chrA1	32334509	G	A	PASS	A	intergenic_region	MODIFIER	LOC111556987-LOC111556764	111556987-111556764	intergenic_region	111556987-111556764		-1	n.32334509G>A
chrA1	32335930	C	A	PASS	A	intergenic_region	MODIFIER	LOC111556987-LOC111556764	111556987-111556764	intergenic_region	111556987-111556764		-1	n.32335930C>A
chrA1	32344286	T	C	PASS	C	intergenic_region	MODIFIER	LOC111556987-LOC111556764	111556987-111556764	intergenic_region	111556987-111556764		-1	n.32344286T>C
chrA1	32344787	C	T	PASS	T	intergenic_region	MODIFIER	LOC111556987-LOC111556764	111556987-111556764	intergenic_region	111556987-111556764		-1	n.32344787C>T
chrA1	32347238	C	A	PASS	A	intergenic_region	MODIFIER	LOC111556987-LOC111556764	111556987-111556764	intergenic_region	111556987-111556764		-1	n.32347238C>A
chrA1	32347683	T	C	PASS	C	intergenic_region	MODIFIER	LOC111556987-LOC111556764	111556987-111556764	intergenic_region	111556987-111556764		-1	n.32347683T>C
chrA1	32350497	GA	G	PASS	G	intergenic_region	MODIFIER	LOC111556987-LOC111556764	111556987-111556764	intergenic_region	111556987-111556764		-1	n.32350498delA
chrA1	32351001	C	T	PASS	T	intergenic_region	MODIFIER	LOC111556987-LOC111556764	111556987-111556764	intergenic_region	111556987-111556764		-1	n.32351001C>T
chrA1	32351872	G	A	PASS	A	intergenic_region	MODIFIER	LOC111556987-LOC111556764	111556987-111556764	intergenic_region	111556987-111556764		-1	n.32351872G>A
chrA1	32363555	T	C	PASS	C	intergenic_region	MODIFIER	LOC111556987-LOC111556764	111556987-111556764	intergenic_region	111556987-111556764		-1	n.32363555T>C
chrA1	32365884	A	T	PASS	T	upstream_gene_variant	MODIFIER	LOC111556764	111556764	transcript	XR_002736498.1	pseudogene	-1	n.-2686A>T
chrA1	32365884	A	T	PASS	T	intergenic_region	MODIFIER	LOC111556987-LOC111556764	111556987-111556764	intergenic_region	111556987-111556764		-1	n.32365884A>T
chrA1	32366296	G	T	PASS	T	upstream_gene_variant	MODIFIER	LOC111556764	111556764	transcript	XR_002736498.1	pseudogene	-1	n.-2274G>T
chrA1	32366296	G	T	PASS	T	intergenic_region	MODIFIER	LOC111556987-LOC111556764	111556987-111556764	intergenic_region	111556987-111556764		-1	n.32366296G>T
chrA1	32366297	T	TG	PASS	TG	upstream_gene_variant	MODIFIER	LOC111556764	111556764	transcript	XR_002736498.1	pseudogene	-1	n.-2273_-2272insG
chrA1	32366297	T	TG	PASS	TG	intergenic_region	MODIFIER	LOC111556987-LOC111556764	111556987-111556764	intergenic_region	111556987-111556764		-1	n.32366297_32366298insG
chrA1	32372513	A	G	PASS	G	downstream_gene_variant	MODIFIER	LOC111556764	111556764	transcript	XR_002736498.1	pseudogene	-1	n.*3838A>G
chrA1	32372513	A	G	PASS	G	intergenic_region	MODIFIER	LOC111556764-LOC101093073	111556764-101093073	intergenic_region	111556764-101093073		-1	n.32372513A>G
chrA1	32375442	C	T	PASS	T	intergenic_region	MODIFIER	LOC111556764-LOC101093073	111556764-101093073	intergenic_region	111556764-101093073		-1	n.32375442C>T
chrA1	32389491	T	G	PASS	G	intergenic_region	MODIFIER	LOC111556764-LOC101093073	111556764-101093073	intergenic_region	111556764-101093073		-1	n.32389491T>G
chrA1	32393113	G	A	PASS	A	intergenic_region	MODIFIER	LOC111556764-LOC101093073	111556764-101093073	intergenic_region	111556764-101093073		-1	n.32393113G>A
chrA1	32394396	G	A	PASS	A	intergenic_region	MODIFIER	LOC111556764-LOC101093073	111556764-101093073	intergenic_region	111556764-101093073		-1	n.32394396G>A
chrA1	32398211	A	G	PASS	G	intergenic_region	MODIFIER	LOC111556764-LOC101093073	111556764-101093073	intergenic_region	111556764-101093073		-1	n.32398211A>G
chrA1	32402568	G	A	PASS	A	intergenic_region	MODIFIER	LOC111556764-LOC101093073	111556764-101093073	intergenic_region	111556764-101093073		-1	n.32402568G>A
chrA1	32402653	T	C	PASS	C	intergenic_region	MODIFIER	LOC111556764-LOC101093073	111556764-101093073	intergenic_region	111556764-101093073		-1	n.32402653T>C
chrA1	32403091	T	C	PASS	C	intergenic_region	MODIFIER	LOC111556764-LOC101093073	111556764-101093073	intergenic_region	111556764-101093073		-1	n.32403091T>C
chrA1	32405328	G	T	PASS	T	intergenic_region	MODIFIER	LOC111556764-LOC101093073	111556764-101093073	intergenic_region	111556764-101093073		-1	n.32405328G>T
chrA1	32405614	C	T	PASS	T	intergenic_region	MODIFIER	LOC111556764-LOC101093073	111556764-101093073	intergenic_region	111556764-101093073		-1	n.32405614C>T
chrA1	32409290	G	A	PASS	A	intergenic_region	MODIFIER	LOC111556764-LOC101093073	111556764-101093073	intergenic_region	111556764-101093073		-1	n.32409290G>A
chrA1	32412375	G	A	PASS	A	intergenic_region	MODIFIER	LOC111556764-LOC101093073	111556764-101093073	intergenic_region	111556764-101093073		-1	n.32412375G>A
chrA1	32414275	A	C	PASS	C	intergenic_region	MODIFIER	LOC111556764-LOC101093073	111556764-101093073	intergenic_region	111556764-101093073		-1	n.32414275A>C
chrA1	32414302	CTAA	C	PASS	C	intergenic_region	MODIFIER	LOC111556764-LOC101093073	111556764-101093073	intergenic_region	111556764-101093073		-1	n.32414303_32414305delTAA
chrA1	32414749	G	T	PASS	T	intergenic_region	MODIFIER	LOC111556764-LOC101093073	111556764-101093073	intergenic_region	111556764-101093073		-1	n.32414749G>T
chrA1	32416729	G	A	PASS	A	intergenic_region	MODIFIER	LOC111556764-LOC101093073	111556764-101093073	intergenic_region	111556764-101093073		-1	n.32416729G>A
chrA1	32417607	TACAA	T	PASS	T	intergenic_region	MODIFIER	LOC111556764-LOC101093073	111556764-101093073	intergenic_region	111556764-101093073		-1	n.32417608_32417611delACAA
chrA1	32417915	C	A	PASS	A	intergenic_region	MODIFIER	LOC111556764-LOC101093073	111556764-101093073	intergenic_region	111556764-101093073		-1	n.32417915C>A
chrA1	32418391	C	CTT	PASS	CTT	intergenic_region	MODIFIER	LOC111556764-LOC101093073	111556764-101093073	intergenic_region	111556764-101093073		-1	n.32418391_32418392insTT
chrA1	32418786	T	A	PASS	A	intergenic_region	MODIFIER	LOC111556764-LOC101093073	111556764-101093073	intergenic_region	111556764-101093073		-1	n.32418786T>A
chrA1	32418787	T	A	PASS	A	intergenic_region	MODIFIER	LOC111556764-LOC101093073	111556764-101093073	intergenic_region	111556764-101093073		-1	n.32418787T>A
chrA1	32420507	G	A	PASS	A	intergenic_region	MODIFIER	LOC111556764-LOC101093073	111556764-101093073	intergenic_region	111556764-101093073		-1	n.32420507G>A
chrA1	32422693	A	ATTAATGAAT	PASS	ATTAATGAAT	intergenic_region	MODIFIER	LOC111556764-LOC101093073	111556764-101093073	intergenic_region	111556764-101093073		-1	n.32422693_32422694insTTAATGAAT
chrA1	32425419	CT	C	PASS	C	intergenic_region	MODIFIER	LOC111556764-LOC101093073	111556764-101093073	intergenic_region	111556764-101093073		-1	n.32425420delT
chrA1	32425676	C	CATTAT	PASS	CATTAT	intergenic_region	MODIFIER	LOC111556764-LOC101093073	111556764-101093073	intergenic_region	111556764-101093073		-1	n.32425676_32425677insATTAT
chrA1	32425679	G	T	PASS	T	intergenic_region	MODIFIER	LOC111556764-LOC101093073	111556764-101093073	intergenic_region	111556764-101093073		-1	n.32425679G>T
chrA1	32426994	T	A	PASS	A	intergenic_region	MODIFIER	LOC111556764-LOC101093073	111556764-101093073	intergenic_region	111556764-101093073		-1	n.32426994T>A
chrA1	32427258	C	T	PASS	T	intergenic_region	MODIFIER	LOC111556764-LOC101093073	111556764-101093073	intergenic_region	111556764-101093073		-1	n.32427258C>T
chrA1	32427849	G	T	PASS	T	intergenic_region	MODIFIER	LOC111556764-LOC101093073	111556764-101093073	intergenic_region	111556764-101093073		-1	n.32427849G>T
chrA1	32428628	T	C	PASS	C	intergenic_region	MODIFIER	LOC111556764-LOC101093073	111556764-101093073	intergenic_region	111556764-101093073		-1	n.32428628T>C
chrA1	32428672	C	CT	PASS	CT	intergenic_region	MODIFIER	LOC111556764-LOC101093073	111556764-101093073	intergenic_region	111556764-101093073		-1	n.32428672_32428673insT
chrA1	32429567	CTG	C	PASS	C	intergenic_region	MODIFIER	LOC111556764-LOC101093073	111556764-101093073	intergenic_region	111556764-101093073		-1	n.32429568_32429569delTG
chrA1	32432143	T	G	PASS	G	intergenic_region	MODIFIER	LOC111556764-LOC101093073	111556764-101093073	intergenic_region	111556764-101093073		-1	n.32432143T>G
chrA1	32435609	CTCTT	C	PASS	C	intergenic_region	MODIFIER	LOC111556764-LOC101093073	111556764-101093073	intergenic_region	111556764-101093073		-1	n.32435610_32435613delTCTT
chrA1	32436772	C	T	PASS	T	intergenic_region	MODIFIER	LOC111556764-LOC101093073	111556764-101093073	intergenic_region	111556764-101093073		-1	n.32436772C>T
chrA1	32437913	G	T	PASS	T	intergenic_region	MODIFIER	LOC111556764-LOC101093073	111556764-101093073	intergenic_region	111556764-101093073		-1	n.32437913G>T
chrA1	32446911	C	T	PASS	T	intergenic_region	MODIFIER	LOC111556764-LOC101093073	111556764-101093073	intergenic_region	111556764-101093073		-1	n.32446911C>T
chrA1	32450876	TC	T	PASS	T	intergenic_region	MODIFIER	LOC111556764-LOC101093073	111556764-101093073	intergenic_region	111556764-101093073		-1	n.32450877delC
chrA1	32455316	C	A	PASS	A	intergenic_region	MODIFIER	LOC111556764-LOC101093073	111556764-101093073	intergenic_region	111556764-101093073		-1	n.32455316C>A
chrA1	32455802	CT	C	PASS	C	intergenic_region	MODIFIER	LOC111556764-LOC101093073	111556764-101093073	intergenic_region	111556764-101093073		-1	n.32455803delT
chrA1	32456237	C	T	PASS	T	intergenic_region	MODIFIER	LOC111556764-LOC101093073	111556764-101093073	intergenic_region	111556764-101093073		-1	n.32456237C>T
chrA1	32457619	G	A	PASS	A	intergenic_region	MODIFIER	LOC111556764-LOC101093073	111556764-101093073	intergenic_region	111556764-101093073		-1	n.32457619G>A
chrA1	32458749	C	T	PASS	T	intergenic_region	MODIFIER	LOC111556764-LOC101093073	111556764-101093073	intergenic_region	111556764-101093073		-1	n.32458749C>T
chrA1	32459077	T	C	PASS	C	intergenic_region	MODIFIER	LOC111556764-LOC101093073	111556764-101093073	intergenic_region	111556764-101093073		-1	n.32459077T>C
chrA1	32459320	C	G	PASS	G	intergenic_region	MODIFIER	LOC111556764-LOC101093073	111556764-101093073	intergenic_region	111556764-101093073		-1	n.32459320C>G
chrA1	32460183	G	A	PASS	A	intergenic_region	MODIFIER	LOC111556764-LOC101093073	111556764-101093073	intergenic_region	111556764-101093073		-1	n.32460183G>A
chrA1	32460364	T	C	PASS	C	intergenic_region	MODIFIER	LOC111556764-LOC101093073	111556764-101093073	intergenic_region	111556764-101093073		-1	n.32460364T>C
chrA1	32460515	A	G	PASS	G	intergenic_region	MODIFIER	LOC111556764-LOC101093073	111556764-101093073	intergenic_region	111556764-101093073		-1	n.32460515A>G
chrA1	32460672	A	G	PASS	G	intergenic_region	MODIFIER	LOC111556764-LOC101093073	111556764-101093073	intergenic_region	111556764-101093073		-1	n.32460672A>G
chrA1	32460987	A	G	PASS	G	intergenic_region	MODIFIER	LOC111556764-LOC101093073	111556764-101093073	intergenic_region	111556764-101093073		-1	n.32460987A>G
chrA1	32461566	G	A	PASS	A	intergenic_region	MODIFIER	LOC111556764-LOC101093073	111556764-101093073	intergenic_region	111556764-101093073		-1	n.32461566G>A
chrA1	32467146	G	A	PASS	A	intergenic_region	MODIFIER	LOC111556764-LOC101093073	111556764-101093073	intergenic_region	111556764-101093073		-1	n.32467146G>A
chrA1	32471060	CTTT	C	PASS	C	intergenic_region	MODIFIER	LOC111556764-LOC101093073	111556764-101093073	intergenic_region	111556764-101093073		-1	n.32471061_32471063delTTT
chrA1	32479064	C	G	PASS	G	intergenic_region	MODIFIER	LOC111556764-LOC101093073	111556764-101093073	intergenic_region	111556764-101093073		-1	n.32479064C>G
chrA1	32482069	A	G	PASS	G	intergenic_region	MODIFIER	LOC111556764-LOC101093073	111556764-101093073	intergenic_region	111556764-101093073		-1	n.32482069A>G
chrA1	32486893	G	A	PASS	A	intergenic_region	MODIFIER	LOC111556764-LOC101093073	111556764-101093073	intergenic_region	111556764-101093073		-1	n.32486893G>A
chrA1	32488411	T	G	PASS	G	intergenic_region	MODIFIER	LOC111556764-LOC101093073	111556764-101093073	intergenic_region	111556764-101093073		-1	n.32488411T>G
chrA1	32714405	A	G	PASS	G	intergenic_region	MODIFIER	LOC101093324-LOC101093574	101093324-101093574	intergenic_region	101093324-101093574		-1	n.32714405A>G
chrA1	33079746	A	G	PASS	G	intergenic_region	MODIFIER	LOC101093574-LOC101094319	101093574-101094319	intergenic_region	101093574-101094319		-1	n.33079746A>G
chrA1	33368056	G	A	PASS	A	intergenic_region	MODIFIER	LOC101093574-LOC101094319	101093574-101094319	intergenic_region	101093574-101094319		-1	n.33368056G>A
chrA1	33576494	A	C	PASS	C	intergenic_region	MODIFIER	LOC101093574-LOC101094319	101093574-101094319	intergenic_region	101093574-101094319		-1	n.33576494A>C
chrA1	33614165	T	TTC	PASS	TTC	intergenic_region	MODIFIER	LOC101093574-LOC101094319	101093574-101094319	intergenic_region	101093574-101094319		-1	n.33614165_33614166insTC
chrA1	33659293	GCTTA	G	PASS	G	intergenic_region	MODIFIER	LOC101094319-LOC109498720	101094319-109498720	intergenic_region	101094319-109498720		-1	n.33659294_33659297delCTTA
chrA1	33876998	A	G	PASS	G	intergenic_region	MODIFIER	LOC101094319-LOC109498720	101094319-109498720	intergenic_region	101094319-109498720		-1	n.33876998A>G
chrA1	33953979	C	G	PASS	G	intergenic_region	MODIFIER	LOC109498720-PCDH17	109498720-101093827	intergenic_region	109498720-101093827		-1	n.33953979C>G
chrA1	33996938	G	A	PASS	A	intergenic_region	MODIFIER	LOC109498720-PCDH17	109498720-101093827	intergenic_region	109498720-101093827		-1	n.33996938G>A
chrA1	34029632	G	A	PASS	A	intergenic_region	MODIFIER	LOC109498720-PCDH17	109498720-101093827	intergenic_region	109498720-101093827		-1	n.34029632G>A
chrA1	34051780	A	G	PASS	G	intergenic_region	MODIFIER	LOC109498720-PCDH17	109498720-101093827	intergenic_region	109498720-101093827		-1	n.34051780A>G
chrA1	34088324	C	T	PASS	T	intron_variant	MODIFIER	PCDH17	101093827	transcript	XM_019827548.2	protein_coding	2	c.2593-12465C>T
chrA1	34088324	C	T	PASS	T	intron_variant	MODIFIER	LOC111559874	111559874	transcript	XR_002741311.1	pseudogene	2	n.2098+3363G>A
chrA1	34088324	C	T	PASS	T	intron_variant	MODIFIER	PCDH17	101093827	transcript	XM_003980433.5	protein_coding	1	c.2593-12465C>T
chrA1	34088324	C	T	PASS	T	intron_variant	MODIFIER	PCDH17	101093827	transcript	XM_019827553.2	protein_coding	1	c.2593-12465C>T
chrA1	34088324	C	T	PASS	T	intron_variant	MODIFIER	LOC111559874	111559874	transcript	XR_002741316.1	pseudogene	3	n.337+3363G>A
chrA1	34366968	G	A	PASS	A	intergenic_region	MODIFIER	LOC101094074-LOC101095306	101094074-101095306	intergenic_region	101094074-101095306		-1	n.34366968G>A
chrA1	34369241	C	T	PASS	T	intergenic_region	MODIFIER	LOC101094074-LOC101095306	101094074-101095306	intergenic_region	101094074-101095306		-1	n.34369241C>T
chrA1	34370287	CAGAG	C	PASS	C	intergenic_region	MODIFIER	LOC101094074-LOC101095306	101094074-101095306	intergenic_region	101094074-101095306		-1	n.34370288_34370291delAGAG
chrA1	34374474	G	A	PASS	A	intergenic_region	MODIFIER	LOC101094074-LOC101095306	101094074-101095306	intergenic_region	101094074-101095306		-1	n.34374474G>A
chrA1	34379077	G	A	PASS	A	intergenic_region	MODIFIER	LOC101094074-LOC101095306	101094074-101095306	intergenic_region	101094074-101095306		-1	n.34379077G>A
chrA1	34387194	T	A	PASS	A	intergenic_region	MODIFIER	LOC101094074-LOC101095306	101094074-101095306	intergenic_region	101094074-101095306		-1	n.34387194T>A
chrA1	34388059	C	T	PASS	T	intergenic_region	MODIFIER	LOC101094074-LOC101095306	101094074-101095306	intergenic_region	101094074-101095306		-1	n.34388059C>T
chrA1	34389125	A	AT	PASS	AT	intergenic_region	MODIFIER	LOC101094074-LOC101095306	101094074-101095306	intergenic_region	101094074-101095306		-1	n.34389125_34389126insT
chrA1	34390207	G	A	PASS	A	intergenic_region	MODIFIER	LOC101094074-LOC101095306	101094074-101095306	intergenic_region	101094074-101095306		-1	n.34390207G>A
chrA1	34392186	C	T	PASS	T	intergenic_region	MODIFIER	LOC101094074-LOC101095306	101094074-101095306	intergenic_region	101094074-101095306		-1	n.34392186C>T
chrA1	34394017	T	G	PASS	G	intergenic_region	MODIFIER	LOC101094074-LOC101095306	101094074-101095306	intergenic_region	101094074-101095306		-1	n.34394017T>G
chrA1	34397315	G	A	PASS	A	intergenic_region	MODIFIER	LOC101094074-LOC101095306	101094074-101095306	intergenic_region	101094074-101095306		-1	n.34397315G>A
chrA1	34397620	C	T	PASS	T	intergenic_region	MODIFIER	LOC101094074-LOC101095306	101094074-101095306	intergenic_region	101094074-101095306		-1	n.34397620C>T
chrA1	34397676	T	C	PASS	C	intergenic_region	MODIFIER	LOC101094074-LOC101095306	101094074-101095306	intergenic_region	101094074-101095306		-1	n.34397676T>C
chrA1	34399795	G	A	PASS	A	intergenic_region	MODIFIER	LOC101094074-LOC101095306	101094074-101095306	intergenic_region	101094074-101095306		-1	n.34399795G>A
chrA1	34403261	G	T	PASS	T	intergenic_region	MODIFIER	LOC101094074-LOC101095306	101094074-101095306	intergenic_region	101094074-101095306		-1	n.34403261G>T
chrA1	34403705	TAC	T	PASS	T	intergenic_region	MODIFIER	LOC101094074-LOC101095306	101094074-101095306	intergenic_region	101094074-101095306		-1	n.34403706_34403707delAC
chrA1	34405561	G	A	PASS	A	intergenic_region	MODIFIER	LOC101094074-LOC101095306	101094074-101095306	intergenic_region	101094074-101095306		-1	n.34405561G>A
chrA1	34406155	G	A	PASS	A	intergenic_region	MODIFIER	LOC101094074-LOC101095306	101094074-101095306	intergenic_region	101094074-101095306		-1	n.34406155G>A
chrA1	34410871	C	T	PASS	T	intergenic_region	MODIFIER	LOC101094074-LOC101095306	101094074-101095306	intergenic_region	101094074-101095306		-1	n.34410871C>T
chrA1	35385363	C	G	PASS	G	intergenic_region	MODIFIER	LOC101095306-LOC111559877	101095306-111559877	intergenic_region	101095306-111559877		-1	n.35385363C>G
chrA1	36065251	G	GGT	PASS	GGT	intron_variant	MODIFIER	DIAPH3	101095543	transcript	XM_006927330.4	protein_coding	22	c.2722+303_2722+304insAC
chrA1	36065251	G	GGT	PASS	GGT	intron_variant	MODIFIER	DIAPH3	101095543	transcript	XM_023252114.1	protein_coding	22	c.2722+303_2722+304insAC
chrA1	36065251	G	GGT	PASS	GGT	intron_variant	MODIFIER	DIAPH3	101095543	transcript	XM_019827647.2	protein_coding	16	c.1978+303_1978+304insAC
chrA1	36065251	G	GGT	PASS	GGT	intron_variant	MODIFIER	DIAPH3	101095543	transcript	XM_019827642.2	protein_coding	21	c.2689+303_2689+304insAC
chrA1	36065251	G	GGT	PASS	GGT	intron_variant	MODIFIER	DIAPH3	101095543	transcript	XM_023252126.1	protein_coding	21	c.2482+303_2482+304insAC
chrA1	36065251	G	GGT	PASS	GGT	intron_variant	MODIFIER	DIAPH3	101095543	transcript	XM_019827645.2	protein_coding	22	c.2722+303_2722+304insAC
chrA1	39551775	G	T	PASS	T	intergenic_region	MODIFIER	LOC111556975-LOC101099265	111556975-101099265	intergenic_region	111556975-101099265		-1	n.39551775G>T
chrA1	40630846	C	G	PASS	G	intergenic_region	MODIFIER	LOC101101024-LOC109498326	101101024-109498326	intergenic_region	101101024-109498326		-1	n.40630846C>G
chrA1	43543562	G	A	PASS	A	intergenic_region	MODIFIER	LOC111557037-LOC101080605	111557037-101080605	intergenic_region	111557037-101080605		-1	n.43543562G>A
chrA1	43654201	G	GGGA	PASS	GGGA	intergenic_region	MODIFIER	LOC111557037-LOC101080605	111557037-101080605	intergenic_region	111557037-101080605		-1	n.43654201_43654202insGGA
chrA1	44516776	T	TCAGAGCACATTAAAGCTAGATTTACCAGGAAGTA	PASS	TCAGAGCACATTAAAGCTAGATTTACCAGGAAGTA	intergenic_region	MODIFIER	LOC101099770-LOC101100024	101099770-101100024	intergenic_region	101099770-101100024		-1	n.44516776_44516777insCAGAGCACATTAAAGCTAGATTTACCAGGAAGTA
chrA1	44866356	G	C	PASS	C	intron_variant	MODIFIER	KLHL1	101081600	transcript	XM_011288605.3	protein_coding	6	c.1420+2552C>G
chrA1	44866356	G	C	PASS	C	intron_variant	MODIFIER	KLHL1	101081600	transcript	XM_019827858.2	protein_coding	6	c.1420+2552C>G
chrA1	44948937	C	T	PASS	T	intron_variant	MODIFIER	KLHL1	101081600	transcript	XM_011288605.3	protein_coding	4	c.1020+2764G>A
chrA1	44948937	C	T	PASS	T	intron_variant	MODIFIER	KLHL1	101081600	transcript	XM_019827858.2	protein_coding	4	c.1020+2764G>A
chrA1	44948958	G	A	PASS	A	intron_variant	MODIFIER	KLHL1	101081600	transcript	XM_011288605.3	protein_coding	4	c.1020+2743C>T
chrA1	44948958	G	A	PASS	A	intron_variant	MODIFIER	KLHL1	101081600	transcript	XM_019827858.2	protein_coding	4	c.1020+2743C>T
chrA1	46298102	A	T	PASS	T	intron_variant	MODIFIER	DACH1	101084158	transcript	XM_019827867.2	protein_coding	11	c.2054-6344T>A
chrA1	48607048	G	A	PASS	A	intron_variant	MODIFIER	KLF12	101084926	transcript	XM_019827919.2	protein_coding	3	c.123+13015C>T
chrA1	48607048	G	A	PASS	A	intron_variant	MODIFIER	KLF12	101084926	transcript	XM_023252236.1	protein_coding	3	c.-95+13015C>T
chrA1	48607048	G	A	PASS	A	intron_variant	MODIFIER	KLF12	101084926	transcript	XM_023252226.1	protein_coding	4	c.123+13015C>T
chrA1	48607048	G	A	PASS	A	intron_variant	MODIFIER	KLF12	101084926	transcript	XM_023252230.1	protein_coding	3	c.123+13015C>T
chrA1	48607048	G	A	PASS	A	intron_variant	MODIFIER	KLF12	101084926	transcript	XM_023252229.1	protein_coding	5	c.123+13015C>T
chrA1	48607048	G	A	PASS	A	intron_variant	MODIFIER	KLF12	101084926	transcript	XM_023252234.1	protein_coding	4	c.123+13015C>T
chrA1	48607048	G	A	PASS	A	intron_variant	MODIFIER	KLF12	101084926	transcript	XM_023252231.1	protein_coding	3	c.123+13015C>T
chrA1	48607048	G	A	PASS	A	intron_variant	MODIFIER	KLF12	101084926	transcript	XM_023252227.1	protein_coding	5	c.123+13015C>T
chrA1	48607048	G	A	PASS	A	intron_variant	MODIFIER	KLF12	101084926	transcript	XM_023252228.1	protein_coding	4	c.123+13015C>T
chrA1	48607048	G	A	PASS	A	intron_variant	MODIFIER	KLF12	101084926	transcript	XM_023252233.1	protein_coding	4	c.123+13015C>T
chrA1	49347229	GTA	G	PASS	G	intergenic_region	MODIFIER	LOC109498473-TBC1D4	109498473-101100706	intergenic_region	109498473-101100706		-1	n.49347230_49347231delTA
chrA1	49347264	C	T	PASS	T	intergenic_region	MODIFIER	LOC109498473-TBC1D4	109498473-101100706	intergenic_region	109498473-101100706		-1	n.49347264C>T
chrA1	49347479	GGTGTGT	G	PASS	G	intergenic_region	MODIFIER	LOC109498473-TBC1D4	109498473-101100706	intergenic_region	109498473-101100706		-1	n.49347480_49347485delGTGTGT
chrA1	50736094	A	G	PASS	G	intergenic_region	MODIFIER	LOC109498616-LOC111560078	109498616-111560078	intergenic_region	109498616-111560078		-1	n.50736094A>G
chrA1	50736097	T	TCC	PASS	TCC	intergenic_region	MODIFIER	LOC109498616-LOC111560078	109498616-111560078	intergenic_region	109498616-111560078		-1	n.50736097_50736098insCC
chrA1	50736099	T	C	PASS	C	intergenic_region	MODIFIER	LOC109498616-LOC111560078	109498616-111560078	intergenic_region	109498616-111560078		-1	n.50736099T>C
chrA1	50736101	T	C	PASS	C	intergenic_region	MODIFIER	LOC109498616-LOC111560078	109498616-111560078	intergenic_region	109498616-111560078		-1	n.50736101T>C
chrA1	50736103	T	C	PASS	C	intergenic_region	MODIFIER	LOC109498616-LOC111560078	109498616-111560078	intergenic_region	109498616-111560078		-1	n.50736103T>C
chrA1	50736105	T	C	PASS	C	intergenic_region	MODIFIER	LOC109498616-LOC111560078	109498616-111560078	intergenic_region	109498616-111560078		-1	n.50736105T>C
chrA1	50736114	A	AG	PASS	AG	intergenic_region	MODIFIER	LOC109498616-LOC111560078	109498616-111560078	intergenic_region	109498616-111560078		-1	n.50736114_50736115insG
chrA1	50736117	TATATATATATATATATA	T	PASS	T	intergenic_region	MODIFIER	LOC109498616-LOC111560078	109498616-111560078	intergenic_region	109498616-111560078		-1	n.50736118_50736134delATATATATATATATATA
chrA1	50736136	A	T	PASS	T	intergenic_region	MODIFIER	LOC109498616-LOC111560078	109498616-111560078	intergenic_region	109498616-111560078		-1	n.50736136A>T
chrA1	50736140	A	T	PASS	T	intergenic_region	MODIFIER	LOC109498616-LOC111560078	109498616-111560078	intergenic_region	109498616-111560078		-1	n.50736140A>T
chrA1	50736151	T	A	PASS	A	intergenic_region	MODIFIER	LOC109498616-LOC111560078	109498616-111560078	intergenic_region	109498616-111560078		-1	n.50736151T>A
chrA1	50736156	A	G	PASS	G	intergenic_region	MODIFIER	LOC109498616-LOC111560078	109498616-111560078	intergenic_region	109498616-111560078		-1	n.50736156A>G
chrA1	50736157	T	TG	PASS	TG	intergenic_region	MODIFIER	LOC109498616-LOC111560078	109498616-111560078	intergenic_region	109498616-111560078		-1	n.50736157_50736158insG
chrA1	50736158	A	G	PASS	G	intergenic_region	MODIFIER	LOC109498616-LOC111560078	109498616-111560078	intergenic_region	109498616-111560078		-1	n.50736158A>G
chrA1	50736160	A	G	PASS	G	intergenic_region	MODIFIER	LOC109498616-LOC111560078	109498616-111560078	intergenic_region	109498616-111560078		-1	n.50736160A>G
chrA1	50736162	A	G	PASS	G	intergenic_region	MODIFIER	LOC109498616-LOC111560078	109498616-111560078	intergenic_region	109498616-111560078		-1	n.50736162A>G
chrA1	51688302	C	T	PASS	T	intron_variant	MODIFIER	SCEL	101089485	transcript	XM_019828151.2	protein_coding	1	c.-548-11406C>T
chrA1	51688302	C	T	PASS	T	intron_variant	MODIFIER	SCEL	101089485	transcript	XM_019828143.1	protein_coding	1	c.-632+6369C>T
chrA1	51688302	C	T	PASS	T	intron_variant	MODIFIER	SCEL	101089485	transcript	XM_019828148.1	protein_coding	1	c.-549+6369C>T
chrA1	51688302	C	T	PASS	T	intron_variant	MODIFIER	SCEL	101089485	transcript	XM_019828147.1	protein_coding	1	c.-632+6151C>T
chrA1	52398285	G	GATAATATCAGGCTGTCTTGGA	PASS	GATAATATCAGGCTGTCTTGGA	intergenic_region	MODIFIER	LOC109492603-LOC109498710	109492603-109498710	intergenic_region	109492603-109498710		-1	n.52398285_52398286insATAATATCAGGCTGTCTTGGA
chrA1	54860131	T	G	PASS	G	intergenic_region	MODIFIER	LOC101090481-LOC111556774	101090481-111556774	intergenic_region	101090481-111556774		-1	n.54860131T>G
chrA1	54860133	A	C	PASS	C	intergenic_region	MODIFIER	LOC101090481-LOC111556774	101090481-111556774	intergenic_region	101090481-111556774		-1	n.54860133A>C
chrA1	54902233	TG	T	PASS	T	intergenic_region	MODIFIER	LOC111556774-LOC109498777	111556774-109498777	intergenic_region	111556774-109498777		-1	n.54902234delG
chrA1	54902241	GT	G	PASS	G	intergenic_region	MODIFIER	LOC111556774-LOC109498777	111556774-109498777	intergenic_region	111556774-109498777		-1	n.54902242delT
chrA1	55646115	CCTCT	C	PASS	C	intergenic_region	MODIFIER	LOC109492609-LOC101090984	109492609-101090984	intergenic_region	109492609-101090984		-1	n.55646116_55646119delCTCT
chrA1	55646128	CTCTTTCTTTCTTTCTTTCTTTGTTCCTCTTTCTT	C	PASS	C	intergenic_region	MODIFIER	LOC109492609-LOC101090984	109492609-101090984	intergenic_region	109492609-101090984		-1	n.55646129_55646162delTCTTTCTTTCTTTCTTTCTTTGTTCCTCTTTCTT
chrA1	57588063	G	T	PASS	T	intergenic_region	MODIFIER	LOC101091749-LOC111556509	101091749-111556509	intergenic_region	101091749-111556509		-1	n.57588063G>T
chrA1	57588089	G	A	PASS	A	intergenic_region	MODIFIER	LOC101091749-LOC111556509	101091749-111556509	intergenic_region	101091749-111556509		-1	n.57588089G>A
chrA1	59108926	CAG	C	PASS	C	intergenic_region	MODIFIER	SLITRK6-LOC101092984	101092730-101092984	intergenic_region	101092730-101092984		-1	n.59108927_59108928delAG
chrA1	62231129	G	GT	PASS	GT	intergenic_region	MODIFIER	LOC111556882-LOC109498814	111556882-109498814	intergenic_region	111556882-109498814		-1	n.62231129_62231130insT
chrA1	62231133	C	CA	PASS	CA	intergenic_region	MODIFIER	LOC111556882-LOC109498814	111556882-109498814	intergenic_region	111556882-109498814		-1	n.62231133_62231134insA
chrA1	63334296	T	C	PASS	C	intergenic_region	MODIFIER	LOC111556708-LOC109492621	111556708-109492621	intergenic_region	111556708-109492621		-1	n.63334296T>C
chrA1	63334297	G	A	PASS	A	intergenic_region	MODIFIER	LOC111556708-LOC109492621	111556708-109492621	intergenic_region	111556708-109492621		-1	n.63334297G>A
chrA1	63334298	T	G	PASS	G	intergenic_region	MODIFIER	LOC111556708-LOC109492621	111556708-109492621	intergenic_region	111556708-109492621		-1	n.63334298T>G
chrA1	70176877	C	G	PASS	G	intron_variant	MODIFIER	SLC15A1	101100174	transcript	XM_023252783.1	protein_coding	10	c.810+449G>C
chrA1	70176889	T	C	PASS	C	intron_variant	MODIFIER	SLC15A1	101100174	transcript	XM_023252783.1	protein_coding	10	c.810+437A>G
chrA1	70176890	GTT	G	PASS	G	intron_variant	MODIFIER	SLC15A1	101100174	transcript	XM_023252783.1	protein_coding	10	c.810+434_810+435delAA
chrA1	70176894	A	T	PASS	T	intron_variant	MODIFIER	SLC15A1	101100174	transcript	XM_023252783.1	protein_coding	10	c.810+432T>A
chrA1	70176899	CTG	C	PASS	C	intron_variant	MODIFIER	SLC15A1	101100174	transcript	XM_023252783.1	protein_coding	10	c.810+425_810+426delCA
chrA1	70176905	C	A	PASS	A	intron_variant	MODIFIER	SLC15A1	101100174	transcript	XM_023252783.1	protein_coding	10	c.810+421G>T
chrA1	70176911	G	C	PASS	C	intron_variant	MODIFIER	SLC15A1	101100174	transcript	XM_023252783.1	protein_coding	10	c.810+415C>G
chrA1	70176917	AAGGTG	A	PASS	A	intron_variant	MODIFIER	SLC15A1	101100174	transcript	XM_023252783.1	protein_coding	10	c.810+404_810+408delCACCT
chrA1	70176927	A	C	PASS	C	intron_variant	MODIFIER	SLC15A1	101100174	transcript	XM_023252783.1	protein_coding	10	c.810+399T>G
chrA1	70176929	TTTA	T	PASS	T	intron_variant	MODIFIER	SLC15A1	101100174	transcript	XM_023252783.1	protein_coding	10	c.810+394_810+396delTAA
chrA1	70176942	A	C	PASS	C	intron_variant	MODIFIER	SLC15A1	101100174	transcript	XM_023252783.1	protein_coding	10	c.810+384T>G
chrA1	70176943	TAAA	T	PASS	T	intron_variant	MODIFIER	SLC15A1	101100174	transcript	XM_023252783.1	protein_coding	10	c.810+380_810+382delTTT
chrA1	70176952	A	C	PASS	C	intron_variant	MODIFIER	SLC15A1	101100174	transcript	XM_023252783.1	protein_coding	10	c.810+374T>G
chrA1	70176953	TA	T	PASS	T	intron_variant	MODIFIER	SLC15A1	101100174	transcript	XM_023252783.1	protein_coding	10	c.810+372delT
chrA1	70176957	A	G	PASS	G	intron_variant	MODIFIER	SLC15A1	101100174	transcript	XM_023252783.1	protein_coding	10	c.810+369T>C
chrA1	70176958	TA	T	PASS	T	intron_variant	MODIFIER	SLC15A1	101100174	transcript	XM_023252783.1	protein_coding	10	c.810+367delT
chrA1	70573102	T	TATG	PASS	TATG	intergenic_region	MODIFIER	DOCK9-LOC111560153	101100435-111560153	intergenic_region	101100435-111560153		-1	n.70573102_70573103insATG
chrA1	70573105	G	GTTAGTGAAAAGACAGTTTTTTATTGTGTCAAAATGTTCATAATGTACCCTTAAAAGAGTATCGTT	PASS	GTTAGTGAAAAGACAGTTTTTTATTGTGTCAAAATGTTCATAATGTACCCTTAAAAGAGTATCGTT	intergenic_region	MODIFIER	DOCK9-LOC111560153	101100435-111560153	intergenic_region	101100435-111560153		-1	n.70573105_70573106insTTAGTGAAAAGACAGTTTTTTATTGTGTCAAAATGTTCATAATGTACCCTTAAAAGAGTATCGTT
chrA1	71365080	G	C	PASS	C	intergenic_region	MODIFIER	ZIC2-LOC109499045	101084160-109499045	intergenic_region	101084160-109499045		-1	n.71365080G>C
chrA1	75408705	GAGA	G	PASS	G	intergenic_region	MODIFIER	LOC109499098-LOC111560119	109499098-111560119	intergenic_region	109499098-111560119		-1	n.75408706_75408708delAGA
chrA1	75408711	AG	A	PASS	A	intergenic_region	MODIFIER	LOC109499098-LOC111560119	109499098-111560119	intergenic_region	109499098-111560119		-1	n.75408712delG
chrA1	75408713	AGG	A	PASS	A	intergenic_region	MODIFIER	LOC109499098-LOC111560119	109499098-111560119	intergenic_region	109499098-111560119		-1	n.75408714_75408715delGG
chrA1	75408719	G	A	PASS	A	intergenic_region	MODIFIER	LOC109499098-LOC111560119	109499098-111560119	intergenic_region	109499098-111560119		-1	n.75408719G>A
chrA1	75619174	T	TG	PASS	TG	upstream_gene_variant	MODIFIER	LOC111560119	111560119	transcript	XR_002741698.1	pseudogene	-1	n.-4032_-4031insG
chrA1	75619174	T	TG	PASS	TG	intergenic_region	MODIFIER	LOC109499098-LOC111560119	109499098-111560119	intergenic_region	109499098-111560119		-1	n.75619174_75619175insG
chrA1	76698747	C	G	PASS	G	intergenic_region	MODIFIER	LOC101087193-LOC109492637	101087193-109492637	intergenic_region	101087193-109492637		-1	n.76698747C>G
chrA1	84562236	AAGGAG	A	PASS	A	intergenic_region	MODIFIER	LOC101084595-SH3BP5L	101084595-101081517	intergenic_region	101084595-101081517		-1	n.84562237_84562241delAGGAG
chrA1	87667984	T	TC	PASS	TC	upstream_gene_variant	MODIFIER	ZNF496	101093076	transcript	XM_023253645.1	protein_coding	-1	c.-6059_-6058insC
chrA1	87667984	T	TC	PASS	TC	upstream_gene_variant	MODIFIER	ZNF496	101093076	transcript	XM_023253661.1	protein_coding	-1	c.-6119_-6118insC
chrA1	87667984	T	TC	PASS	TC	upstream_gene_variant	MODIFIER	ZNF496	101093076	transcript	XM_023253648.1	protein_coding	-1	c.-6059_-6058insC
chrA1	87667984	T	TC	PASS	TC	upstream_gene_variant	MODIFIER	ZNF496	101093076	transcript	XM_023253656.1	protein_coding	-1	c.-6059_-6058insC
chrA1	87667984	T	TC	PASS	TC	upstream_gene_variant	MODIFIER	ZNF496	101093076	transcript	XM_023253675.1	protein_coding	-1	c.-6059_-6058insC
chrA1	87667984	T	TC	PASS	TC	upstream_gene_variant	MODIFIER	ZNF496	101093076	transcript	XM_023253682.1	protein_coding	-1	c.-6059_-6058insC
chrA1	87667984	T	TC	PASS	TC	upstream_gene_variant	MODIFIER	ZNF496	101093076	transcript	XM_023253683.1	protein_coding	-1	c.-6059_-6058insC
chrA1	87667984	T	TC	PASS	TC	upstream_gene_variant	MODIFIER	ZNF496	101093076	transcript	XM_023253669.1	protein_coding	-1	c.-6059_-6058insC
chrA1	87667984	T	TC	PASS	TC	intergenic_region	MODIFIER	LOC101092822-ZNF496	101092822-101093076	intergenic_region	101092822-101093076		-1	n.87667984_87667985insC
chrA1	90981078	G	C	PASS	C	downstream_gene_variant	MODIFIER	LOC111557322	111557322	transcript	XM_023241873.1	protein_coding	-1	c.*3094C>G
chrA1	90981078	G	C	PASS	C	intergenic_region	MODIFIER	LOC109497081-LOC111557322	109497081-111557322	intergenic_region	109497081-111557322		-1	n.90981078G>C
chrA1	91792951	G	GT	PASS	GT	intron_variant	MODIFIER	LOC102901511	102901511	transcript	XR_002742273.1	pseudogene	3	n.353+27990_353+27991insA
chrA1	91792954	C	CA	PASS	CA	intron_variant	MODIFIER	LOC102901511	102901511	transcript	XR_002742273.1	pseudogene	3	n.353+27987_353+27988insT
chrA1	92993167	G	A	PASS	A	intergenic_region	MODIFIER	RUFY1-ADAMTS2	101086369-101096945	intergenic_region	101086369-101096945		-1	n.92993167G>A
chrA1	92993171	G	GCCCA	PASS	GCCCA	intergenic_region	MODIFIER	RUFY1-ADAMTS2	101086369-101096945	intergenic_region	101086369-101096945		-1	n.92993171_92993172insCCCA
chrA1	92993173	G	GCTGGGGC	PASS	GCTGGGGC	intergenic_region	MODIFIER	RUFY1-ADAMTS2	101086369-101096945	intergenic_region	101086369-101096945		-1	n.92993173_92993174insCTGGGGC
chrA1	92993175	G	A	PASS	A	intergenic_region	MODIFIER	RUFY1-ADAMTS2	101086369-101096945	intergenic_region	101086369-101096945		-1	n.92993175G>A
chrA1	92993180	A	AAG	PASS	AAG	intergenic_region	MODIFIER	RUFY1-ADAMTS2	101086369-101096945	intergenic_region	101086369-101096945		-1	n.92993180_92993181insAG
chrA1	98527659	GA	G	PASS	G	intergenic_region	MODIFIER	LOC111556922-LOC111560532	111556922-111560532	intergenic_region	111556922-111560532		-1	n.98527660delA
chrA1	98527665	A	G	PASS	G	intergenic_region	MODIFIER	LOC111556922-LOC111560532	111556922-111560532	intergenic_region	111556922-111560532		-1	n.98527665A>G
chrA1	100794291	G	A	PASS	A	intron_variant	MODIFIER	LOC111560545	111560545	transcript	XR_002742531.1	pseudogene	2	n.270+34820G>A
chrA1	101428646	AT	A	PASS	A	intergenic_region	MODIFIER	LOC101092231-LOC109499940	101092231-109499940	intergenic_region	101092231-109499940		-1	n.101428647delT
chrA1	103823926	C	T	PASS	T	intron_variant	MODIFIER	CSNK1G3	101085017	transcript	XM_011281832.3	protein_coding	1	c.-250-13830C>T
chrA1	103823926	C	T	PASS	T	intron_variant	MODIFIER	CSNK1G3	101085017	transcript	XM_023254731.1	protein_coding	1	c.-250-13830C>T
chrA1	103823926	C	T	PASS	T	intron_variant	MODIFIER	CSNK1G3	101085017	transcript	XM_023254710.1	protein_coding	1	c.-250-13830C>T
chrA1	103823926	C	T	PASS	T	intron_variant	MODIFIER	CSNK1G3	101085017	transcript	XM_023254718.1	protein_coding	1	c.-250-13830C>T
chrA1	103823926	C	T	PASS	T	intron_variant	MODIFIER	CSNK1G3	101085017	transcript	XM_023254722.1	protein_coding	1	c.-250-13830C>T
chrA1	103823926	C	T	PASS	T	intron_variant	MODIFIER	CSNK1G3	101085017	transcript	XM_023254726.1	protein_coding	1	c.-250-13830C>T
chrA1	103823926	C	T	PASS	T	intron_variant	MODIFIER	CSNK1G3	101085017	transcript	XM_023254728.1	protein_coding	1	c.-250-13830C>T
chrA1	103823926	C	T	PASS	T	intron_variant	MODIFIER	CSNK1G3	101085017	transcript	XM_023254730.1	protein_coding	1	c.-250-13830C>T
chrA1	103823926	C	T	PASS	T	intron_variant	MODIFIER	CSNK1G3	101085017	transcript	XM_019831514.2	protein_coding	1	c.-250-13830C>T
chrA1	103823926	C	T	PASS	T	intron_variant	MODIFIER	CSNK1G3	101085017	transcript	XM_019831506.2	protein_coding	1	c.-251+5173C>T
chrA1	103823932	G	A	PASS	A	intron_variant	MODIFIER	CSNK1G3	101085017	transcript	XM_011281832.3	protein_coding	1	c.-250-13824G>A
chrA1	103823932	G	A	PASS	A	intron_variant	MODIFIER	CSNK1G3	101085017	transcript	XM_023254731.1	protein_coding	1	c.-250-13824G>A
chrA1	103823932	G	A	PASS	A	intron_variant	MODIFIER	CSNK1G3	101085017	transcript	XM_023254710.1	protein_coding	1	c.-250-13824G>A
chrA1	103823932	G	A	PASS	A	intron_variant	MODIFIER	CSNK1G3	101085017	transcript	XM_023254718.1	protein_coding	1	c.-250-13824G>A
chrA1	103823932	G	A	PASS	A	intron_variant	MODIFIER	CSNK1G3	101085017	transcript	XM_023254722.1	protein_coding	1	c.-250-13824G>A
chrA1	103823932	G	A	PASS	A	intron_variant	MODIFIER	CSNK1G3	101085017	transcript	XM_023254726.1	protein_coding	1	c.-250-13824G>A
chrA1	103823932	G	A	PASS	A	intron_variant	MODIFIER	CSNK1G3	101085017	transcript	XM_023254728.1	protein_coding	1	c.-250-13824G>A
chrA1	103823932	G	A	PASS	A	intron_variant	MODIFIER	CSNK1G3	101085017	transcript	XM_023254730.1	protein_coding	1	c.-250-13824G>A
chrA1	103823932	G	A	PASS	A	intron_variant	MODIFIER	CSNK1G3	101085017	transcript	XM_019831514.2	protein_coding	1	c.-250-13824G>A
chrA1	103823932	G	A	PASS	A	intron_variant	MODIFIER	CSNK1G3	101085017	transcript	XM_019831506.2	protein_coding	1	c.-251+5179G>A
chrA1	103823937	T	A	PASS	A	intron_variant	MODIFIER	CSNK1G3	101085017	transcript	XM_011281832.3	protein_coding	1	c.-250-13819T>A
chrA1	103823937	T	A	PASS	A	intron_variant	MODIFIER	CSNK1G3	101085017	transcript	XM_023254731.1	protein_coding	1	c.-250-13819T>A
chrA1	103823937	T	A	PASS	A	intron_variant	MODIFIER	CSNK1G3	101085017	transcript	XM_023254710.1	protein_coding	1	c.-250-13819T>A
chrA1	103823937	T	A	PASS	A	intron_variant	MODIFIER	CSNK1G3	101085017	transcript	XM_023254718.1	protein_coding	1	c.-250-13819T>A
chrA1	103823937	T	A	PASS	A	intron_variant	MODIFIER	CSNK1G3	101085017	transcript	XM_023254722.1	protein_coding	1	c.-250-13819T>A
chrA1	103823937	T	A	PASS	A	intron_variant	MODIFIER	CSNK1G3	101085017	transcript	XM_023254726.1	protein_coding	1	c.-250-13819T>A
chrA1	103823937	T	A	PASS	A	intron_variant	MODIFIER	CSNK1G3	101085017	transcript	XM_023254728.1	protein_coding	1	c.-250-13819T>A
chrA1	103823937	T	A	PASS	A	intron_variant	MODIFIER	CSNK1G3	101085017	transcript	XM_023254730.1	protein_coding	1	c.-250-13819T>A
chrA1	103823937	T	A	PASS	A	intron_variant	MODIFIER	CSNK1G3	101085017	transcript	XM_019831514.2	protein_coding	1	c.-250-13819T>A
chrA1	103823937	T	A	PASS	A	intron_variant	MODIFIER	CSNK1G3	101085017	transcript	XM_019831506.2	protein_coding	1	c.-251+5184T>A
chrA1	103883102	C	T	PASS	T	intron_variant	MODIFIER	CSNK1G3	101085017	transcript	XM_011281832.3	protein_coding	8	c.845-596C>T
chrA1	103883102	C	T	PASS	T	intron_variant	MODIFIER	CSNK1G3	101085017	transcript	XM_023254731.1	protein_coding	8	c.845-599C>T
chrA1	103883102	C	T	PASS	T	intron_variant	MODIFIER	CSNK1G3	101085017	transcript	XM_023254710.1	protein_coding	8	c.845-596C>T
chrA1	103883102	C	T	PASS	T	intron_variant	MODIFIER	CSNK1G3	101085017	transcript	XM_023254718.1	protein_coding	8	c.845-599C>T
chrA1	103883102	C	T	PASS	T	intron_variant	MODIFIER	CSNK1G3	101085017	transcript	XM_023254722.1	protein_coding	8	c.845-596C>T
chrA1	103883102	C	T	PASS	T	intron_variant	MODIFIER	CSNK1G3	101085017	transcript	XM_023254726.1	protein_coding	8	c.845-596C>T
chrA1	103883102	C	T	PASS	T	intron_variant	MODIFIER	CSNK1G3	101085017	transcript	XM_023254728.1	protein_coding	8	c.845-596C>T
chrA1	103883102	C	T	PASS	T	intron_variant	MODIFIER	CSNK1G3	101085017	transcript	XM_023254730.1	protein_coding	8	c.845-599C>T
chrA1	103883102	C	T	PASS	T	intron_variant	MODIFIER	CSNK1G3	101085017	transcript	XM_019831514.2	protein_coding	8	c.845-596C>T
chrA1	103883102	C	T	PASS	T	intron_variant	MODIFIER	CSNK1G3	101085017	transcript	XM_019831506.2	protein_coding	8	c.845-596C>T
chrA1	103937103	T	C	PASS	C	intergenic_region	MODIFIER	CSNK1G3-LOC109500076	101085017-109500076	intergenic_region	101085017-109500076		-1	n.103937103T>C
chrA1	104556278	G	A	PASS	A	intergenic_region	MODIFIER	LOC109492798-ZNF608	109492798-101085523	intergenic_region	109492798-101085523		-1	n.104556278G>A
chrA1	104561821	G	A	PASS	A	intergenic_region	MODIFIER	LOC109492798-ZNF608	109492798-101085523	intergenic_region	109492798-101085523		-1	n.104561821G>A
chrA1	106049290	G	A	PASS	A	intergenic_region	MODIFIER	LOC111557509-LOC101085776	111557509-101085776	intergenic_region	111557509-101085776		-1	n.106049290G>A
chrA1	106199608	C	T	PASS	T	intergenic_region	MODIFIER	LOC111560613-LOC101089573	111560613-101089573	intergenic_region	111560613-101089573		-1	n.106199608C>T
chrA1	106432052	G	A	PASS	A	intron_variant	MODIFIER	ALDH7A1	101086623	transcript	XM_003980723.5	protein_coding	10	c.914-34C>T
chrA1	107723015	T	TGGTTGGGGCGCCTGGGTGGCGCAGTCGGTTAAGCGTCCGACTTCAGCCAGGTCAC	PASS	TGGTTGGGGCGCCTGGGTGGCGCAGTCGGTTAAGCGTCCGACTTCAGCCAGGTCAC	intergenic_region	MODIFIER	CCDC192-SLC12A2	101090078-101090325	intergenic_region	101090078-101090325		-1	n.107723015_107723016insGGTTGGGGCGCCTGGGTGGCGCAGTCGGTTAAGCGTCCGACTTCAGCCAGGTCAC
chrA1	109788339	TTTTA	T	PASS	T	intergenic_region	MODIFIER	LOC101082876-LOC111557055	101082876-111557055	intergenic_region	101082876-111557055		-1	n.109788340_109788343delTTTA
chrA1	109788348	G	GC	PASS	GC	intergenic_region	MODIFIER	LOC101082876-LOC111557055	101082876-111557055	intergenic_region	101082876-111557055		-1	n.109788348_109788349insC
chrA1	109788352	GT	G	PASS	G	intergenic_region	MODIFIER	LOC101082876-LOC111557055	101082876-111557055	intergenic_region	101082876-111557055		-1	n.109788353delT
chrA1	109788356	GTT	G	PASS	G	intergenic_region	MODIFIER	LOC101082876-LOC111557055	101082876-111557055	intergenic_region	101082876-111557055		-1	n.109788357_109788358delTT
chrA1	109789174	AT	A	PASS	A	intergenic_region	MODIFIER	LOC101082876-LOC111557055	101082876-111557055	intergenic_region	101082876-111557055		-1	n.109789175delT
chrA1	110201035	G	T	PASS	T	intergenic_region	MODIFIER	LOC111556990-HINT1	111556990-101083139	intergenic_region	111556990-101083139		-1	n.110201035G>T
chrA1	112255632	TTCTTCTTCTTCTTCTTCG	T	PASS	T	intergenic_region	MODIFIER	HSPA4-FSTL4	101097784-101098032	intergenic_region	101097784-101098032		-1	n.112255633_112255650delTCTTCTTCTTCTTCTTCG
chrA1	117948357	T	TA	PASS	TA	upstream_gene_variant	MODIFIER	UBE2D2	101092081	transcript	XM_006927651.3	protein_coding	-1	c.-253_-252insA
chrA1	117948357	T	TA	PASS	TA	intron_variant	MODIFIER	UBE2D2	101092081	transcript	XM_023255744.1	protein_coding	1	c.25-10843_25-10842insA
chrA1	117948357	T	TA	PASS	TA	intron_variant	MODIFIER	UBE2D2	101092081	transcript	XM_023255749.1	protein_coding	2	c.-117+7462_-117+7463insA
chrA1	117948357	T	TA	PASS	TA	intron_variant	MODIFIER	UBE2D2	101092081	transcript	XM_023255748.1	protein_coding	1	c.-64+7462_-64+7463insA
chrA1	124674403	TA	T	PASS	T	upstream_gene_variant	MODIFIER	PPP2R2B	101084083	transcript	XM_019833921.2	protein_coding	-1	c.-2285delT
chrA1	124674403	TA	T	PASS	T	upstream_gene_variant	MODIFIER	PPP2R2B	101084083	transcript	XM_019833906.2	protein_coding	-1	c.-2290delT
chrA1	124674403	TA	T	PASS	T	intron_variant	MODIFIER	PPP2R2B	101084083	transcript	XM_011282787.2	protein_coding	2	c.296+33469delT
chrA1	124674403	TA	T	PASS	T	intron_variant	MODIFIER	PPP2R2B	101084083	transcript	XM_019833919.1	protein_coding	2	c.88+33469delT
chrA1	124674403	TA	T	PASS	T	intron_variant	MODIFIER	PPP2R2B	101084083	transcript	XM_019833907.1	protein_coding	2	c.112+33469delT
chrA1	132351794	T	C	PASS	C	intron_variant	MODIFIER	IPO11	105260725	transcript	XM_023256975.1	protein_coding	22	c.2089+3064T>C
chrA1	132351794	T	C	PASS	C	intron_variant	MODIFIER	IPO11	105260725	transcript	XM_023256987.1	protein_coding	22	c.2089+3064T>C
chrA1	132351794	T	C	PASS	C	intron_variant	MODIFIER	IPO11	105260725	transcript	XM_023256985.1	protein_coding	22	c.2089+3064T>C
chrA1	132351794	T	C	PASS	C	intron_variant	MODIFIER	IPO11	105260725	transcript	XM_023256984.1	protein_coding	22	c.2089+3064T>C
chrA1	132351798	T	C	PASS	C	intron_variant	MODIFIER	IPO11	105260725	transcript	XM_023256975.1	protein_coding	22	c.2089+3068T>C
chrA1	132351798	T	C	PASS	C	intron_variant	MODIFIER	IPO11	105260725	transcript	XM_023256987.1	protein_coding	22	c.2089+3068T>C
chrA1	132351798	T	C	PASS	C	intron_variant	MODIFIER	IPO11	105260725	transcript	XM_023256985.1	protein_coding	22	c.2089+3068T>C
chrA1	132351798	T	C	PASS	C	intron_variant	MODIFIER	IPO11	105260725	transcript	XM_023256984.1	protein_coding	22	c.2089+3068T>C
chrA1	134486355	C	T	PASS	T	intron_variant	MODIFIER	LOC111557729	111557729	transcript	111557729	pseudogene	2	n.317-12C>T
chrA1	136171473	C	CT	PASS	CT	intron_variant	MODIFIER	MAST4	101087553	transcript	XM_023257117.1	protein_coding	6	c.779+40153_779+40154insT
chrA1	137722349	G	GACATAAGAACTTTGACATATGAATTT	PASS	GACATAAGAACTTTGACATATGAATTT	intergenic_region	MODIFIER	LOC111561372-LOC111561373	111561372-111561373	intergenic_region	111561372-111561373		-1	n.137722349_137722350insACATAAGAACTTTGACATATGAATTT
chrA1	137722351	G	GCC	PASS	GCC	intergenic_region	MODIFIER	LOC111561372-LOC111561373	111561372-111561373	intergenic_region	111561372-111561373		-1	n.137722351_137722352insCC
chrA1	138160754	C	CATA	PASS	CATA	intron_variant	MODIFIER	CDK7	101086781	transcript	XM_003981038.5	protein_coding	2	c.127-2739_127-2738insATA
chrA1	138160756	T	TTGTGA	PASS	TTGTGA	intron_variant	MODIFIER	CDK7	101086781	transcript	XM_003981038.5	protein_coding	2	c.127-2737_127-2736insTGTGA
chrA1	138160762	C	A	PASS	A	intron_variant	MODIFIER	CDK7	101086781	transcript	XM_003981038.5	protein_coding	2	c.127-2731C>A
chrA1	138438536	C	T	PASS	T	intron_variant	MODIFIER	LOC101094730	101094730	transcript	XM_011283892.3	protein_coding	8	c.470+852C>T
chrA1	138438536	C	T	PASS	T	intron_variant	MODIFIER	LOC101094730	101094730	transcript	XM_011283896.3	protein_coding	8	c.470+852C>T
chrA1	138438536	C	T	PASS	T	intron_variant	MODIFIER	LOC101094730	101094730	transcript	XM_019835202.2	protein_coding	8	c.470+852C>T
chrA1	138438536	C	T	PASS	T	intron_variant	MODIFIER	LOC101094730	101094730	transcript	XM_019835198.2	protein_coding	8	c.470+852C>T
chrA1	138438537	TCAGCTGA	T	PASS	T	intron_variant	MODIFIER	LOC101094730	101094730	transcript	XM_011283892.3	protein_coding	8	c.470+854_470+860delCAGCTGA
chrA1	138438537	TCAGCTGA	T	PASS	T	intron_variant	MODIFIER	LOC101094730	101094730	transcript	XM_011283896.3	protein_coding	8	c.470+854_470+860delCAGCTGA
chrA1	138438537	TCAGCTGA	T	PASS	T	intron_variant	MODIFIER	LOC101094730	101094730	transcript	XM_019835202.2	protein_coding	8	c.470+854_470+860delCAGCTGA
chrA1	138438537	TCAGCTGA	T	PASS	T	intron_variant	MODIFIER	LOC101094730	101094730	transcript	XM_019835198.2	protein_coding	8	c.470+854_470+860delCAGCTGA
chrA1	139361553	C	T	PASS	T	downstream_gene_variant	MODIFIER	PTCD2	101095948	transcript	XM_019835328.1	protein_coding	-1	c.*3929C>T
chrA1	139361553	C	T	PASS	T	downstream_gene_variant	MODIFIER	PTCD2	101095948	transcript	XR_002159976.1	pseudogene	-1	n.*4041C>T
chrA1	139361553	C	T	PASS	T	downstream_gene_variant	MODIFIER	PTCD2	101095948	transcript	XM_019835330.1	protein_coding	-1	c.*3929C>T
chrA1	139361553	C	T	PASS	T	downstream_gene_variant	MODIFIER	PTCD2	101095948	transcript	XM_006927785.3	protein_coding	-1	c.*3929C>T
chrA1	139361553	C	T	PASS	T	intron_variant	MODIFIER	LOC109501729	109501729	transcript	XR_002159979.1	pseudogene	2	n.1884+1592G>A
chrA1	139361553	C	T	PASS	T	intron_variant	MODIFIER	PTCD2	101095948	transcript	XM_019835346.1	protein_coding	9	c.928-5877C>T
chrA1	139361553	C	T	PASS	T	intron_variant	MODIFIER	PTCD2	101095948	transcript	XM_023257279.1	protein_coding	9	c.927+9564C>T
chrA1	139361553	C	T	PASS	T	intron_variant	MODIFIER	PTCD2	101095948	transcript	XM_023257284.1	protein_coding	9	c.927+9564C>T
chrA1	139361553	C	T	PASS	T	intron_variant	MODIFIER	PTCD2	101095948	transcript	XR_002159970.2	pseudogene	9	n.953+9564C>T
chrA1	139361553	C	T	PASS	T	intron_variant	MODIFIER	PTCD2	101095948	transcript	XR_002159974.1	pseudogene	9	n.954-5877C>T
chrA1	139361553	C	T	PASS	T	intron_variant	MODIFIER	PTCD2	101095948	transcript	XM_019835337.1	protein_coding	9	c.927+9564C>T
chrA1	139361553	C	T	PASS	T	intron_variant	MODIFIER	LOC109501729	109501729	transcript	XR_002159977.1	pseudogene	2	n.1884+1592G>A
chrA1	139361553	C	T	PASS	T	intron_variant	MODIFIER	LOC109501729	109501729	transcript	XR_002159978.1	pseudogene	2	n.1890+1592G>A
chrA1	139374305	G	C	PASS	C	downstream_gene_variant	MODIFIER	PTCD2	101095948	transcript	XM_019835346.1	protein_coding	-1	c.*6837G>C
chrA1	139374305	G	C	PASS	C	intron_variant	MODIFIER	PTCD2	101095948	transcript	XM_023257279.1	protein_coding	9	c.928-3406G>C
chrA1	139374305	G	C	PASS	C	intron_variant	MODIFIER	PTCD2	101095948	transcript	XM_023257284.1	protein_coding	9	c.928-6197G>C
chrA1	139374305	G	C	PASS	C	intron_variant	MODIFIER	PTCD2	101095948	transcript	XR_002159970.2	pseudogene	9	n.954-6197G>C
chrA1	139374305	G	C	PASS	C	intron_variant	MODIFIER	PTCD2	101095948	transcript	XR_002159974.1	pseudogene	10	n.1095-6197G>C
chrA1	139374305	G	C	PASS	C	intron_variant	MODIFIER	PTCD2	101095948	transcript	XM_019835337.1	protein_coding	9	c.927+22316G>C
chrA1	139381083	C	T	PASS	T	downstream_gene_variant	MODIFIER	PTCD2	101095948	transcript	XM_023257279.1	protein_coding	-1	c.*3229C>T
chrA1	139381083	C	T	PASS	T	intron_variant	MODIFIER	PTCD2	101095948	transcript	XM_023257284.1	protein_coding	10	c.*4+536C>T
chrA1	139381083	C	T	PASS	T	intron_variant	MODIFIER	PTCD2	101095948	transcript	XR_002159970.2	pseudogene	10	n.999+536C>T
chrA1	139381083	C	T	PASS	T	intron_variant	MODIFIER	PTCD2	101095948	transcript	XR_002159974.1	pseudogene	11	n.1140+536C>T
chrA1	139381083	C	T	PASS	T	intron_variant	MODIFIER	PTCD2	101095948	transcript	XM_019835337.1	protein_coding	9	c.927+29094C>T
chrA1	139393824	G	GGGA	PASS	GGGA	intron_variant	MODIFIER	PTCD2	101095948	transcript	XR_002159970.2	pseudogene	11	n.1074+10449_1074+10450insGGA
chrA1	139393824	G	GGGA	PASS	GGGA	intron_variant	MODIFIER	PTCD2	101095948	transcript	XR_002159974.1	pseudogene	12	n.1215+10449_1215+10450insGGA
chrA1	139393824	G	GGGA	PASS	GGGA	intron_variant	MODIFIER	PTCD2	101095948	transcript	XM_019835337.1	protein_coding	9	c.928-38274_928-38273insGGA
chrA1	139394253	C	T	PASS	T	intron_variant	MODIFIER	PTCD2	101095948	transcript	XR_002159970.2	pseudogene	11	n.1074+10878C>T
chrA1	139394253	C	T	PASS	T	intron_variant	MODIFIER	PTCD2	101095948	transcript	XR_002159974.1	pseudogene	12	n.1215+10878C>T
chrA1	139394253	C	T	PASS	T	intron_variant	MODIFIER	PTCD2	101095948	transcript	XM_019835337.1	protein_coding	9	c.928-37845C>T
chrA1	139395860	C	T	PASS	T	intron_variant	MODIFIER	PTCD2	101095948	transcript	XR_002159970.2	pseudogene	11	n.1074+12485C>T
chrA1	139395860	C	T	PASS	T	intron_variant	MODIFIER	PTCD2	101095948	transcript	XR_002159974.1	pseudogene	12	n.1215+12485C>T
chrA1	139395860	C	T	PASS	T	intron_variant	MODIFIER	PTCD2	101095948	transcript	XM_019835337.1	protein_coding	9	c.928-36238C>T
chrA1	139397649	G	C	PASS	C	intron_variant	MODIFIER	PTCD2	101095948	transcript	XR_002159970.2	pseudogene	11	n.1074+14274G>C
chrA1	139397649	G	C	PASS	C	intron_variant	MODIFIER	PTCD2	101095948	transcript	XR_002159974.1	pseudogene	12	n.1215+14274G>C
chrA1	139397649	G	C	PASS	C	intron_variant	MODIFIER	PTCD2	101095948	transcript	XM_019835337.1	protein_coding	9	c.928-34449G>C
chrA1	139398184	T	C	PASS	C	intron_variant	MODIFIER	PTCD2	101095948	transcript	XR_002159970.2	pseudogene	11	n.1074+14809T>C
chrA1	139398184	T	C	PASS	C	intron_variant	MODIFIER	PTCD2	101095948	transcript	XR_002159974.1	pseudogene	12	n.1215+14809T>C
chrA1	139398184	T	C	PASS	C	intron_variant	MODIFIER	PTCD2	101095948	transcript	XM_019835337.1	protein_coding	9	c.928-33914T>C
chrA1	139398987	G	T	PASS	T	intron_variant	MODIFIER	PTCD2	101095948	transcript	XR_002159970.2	pseudogene	11	n.1074+15612G>T
chrA1	139398987	G	T	PASS	T	intron_variant	MODIFIER	PTCD2	101095948	transcript	XR_002159974.1	pseudogene	12	n.1215+15612G>T
chrA1	139398987	G	T	PASS	T	intron_variant	MODIFIER	PTCD2	101095948	transcript	XM_019835337.1	protein_coding	9	c.928-33111G>T
chrA1	139399487	CAGAG	C	PASS	C	intron_variant	MODIFIER	PTCD2	101095948	transcript	XR_002159970.2	pseudogene	11	n.1074+16113_1074+16116delAGAG
chrA1	139399487	CAGAG	C	PASS	C	intron_variant	MODIFIER	PTCD2	101095948	transcript	XR_002159974.1	pseudogene	12	n.1215+16113_1215+16116delAGAG
chrA1	139399487	CAGAG	C	PASS	C	intron_variant	MODIFIER	PTCD2	101095948	transcript	XM_019835337.1	protein_coding	9	c.928-32610_928-32607delAGAG
chrA1	139400276	G	A	PASS	A	intron_variant	MODIFIER	PTCD2	101095948	transcript	XR_002159970.2	pseudogene	11	n.1074+16901G>A
chrA1	139400276	G	A	PASS	A	intron_variant	MODIFIER	PTCD2	101095948	transcript	XR_002159974.1	pseudogene	12	n.1215+16901G>A
chrA1	139400276	G	A	PASS	A	intron_variant	MODIFIER	PTCD2	101095948	transcript	XM_019835337.1	protein_coding	9	c.928-31822G>A
chrA1	139400864	C	T	PASS	T	intron_variant	MODIFIER	PTCD2	101095948	transcript	XR_002159970.2	pseudogene	11	n.1074+17489C>T
chrA1	139400864	C	T	PASS	T	intron_variant	MODIFIER	PTCD2	101095948	transcript	XR_002159974.1	pseudogene	12	n.1215+17489C>T
chrA1	139400864	C	T	PASS	T	intron_variant	MODIFIER	PTCD2	101095948	transcript	XM_019835337.1	protein_coding	9	c.928-31234C>T
chrA1	139401605	T	TTGTGTG	PASS	TTGTGTG	intron_variant	MODIFIER	PTCD2	101095948	transcript	XR_002159970.2	pseudogene	11	n.1074+18230_1074+18231insTGTGTG
chrA1	139401605	T	TTGTGTG	PASS	TTGTGTG	intron_variant	MODIFIER	PTCD2	101095948	transcript	XR_002159974.1	pseudogene	12	n.1215+18230_1215+18231insTGTGTG
chrA1	139401605	T	TTGTGTG	PASS	TTGTGTG	intron_variant	MODIFIER	PTCD2	101095948	transcript	XM_019835337.1	protein_coding	9	c.928-30493_928-30492insTGTGTG
chrA1	139402288	T	C	PASS	C	intron_variant	MODIFIER	PTCD2	101095948	transcript	XR_002159970.2	pseudogene	11	n.1074+18913T>C
chrA1	139402288	T	C	PASS	C	intron_variant	MODIFIER	PTCD2	101095948	transcript	XR_002159974.1	pseudogene	12	n.1215+18913T>C
chrA1	139402288	T	C	PASS	C	intron_variant	MODIFIER	PTCD2	101095948	transcript	XM_019835337.1	protein_coding	9	c.928-29810T>C
chrA1	139402310	TA	T	PASS	T	intron_variant	MODIFIER	PTCD2	101095948	transcript	XR_002159970.2	pseudogene	11	n.1074+18936delA
chrA1	139402310	TA	T	PASS	T	intron_variant	MODIFIER	PTCD2	101095948	transcript	XR_002159974.1	pseudogene	12	n.1215+18936delA
chrA1	139402310	TA	T	PASS	T	intron_variant	MODIFIER	PTCD2	101095948	transcript	XM_019835337.1	protein_coding	9	c.928-29787delA
chrA1	139402390	A	C	PASS	C	intron_variant	MODIFIER	PTCD2	101095948	transcript	XR_002159970.2	pseudogene	11	n.1074+19015A>C
chrA1	139402390	A	C	PASS	C	intron_variant	MODIFIER	PTCD2	101095948	transcript	XR_002159974.1	pseudogene	12	n.1215+19015A>C
chrA1	139402390	A	C	PASS	C	intron_variant	MODIFIER	PTCD2	101095948	transcript	XM_019835337.1	protein_coding	9	c.928-29708A>C
chrA1	139404245	A	T	PASS	T	intron_variant	MODIFIER	PTCD2	101095948	transcript	XR_002159970.2	pseudogene	11	n.1074+20870A>T
chrA1	139404245	A	T	PASS	T	intron_variant	MODIFIER	PTCD2	101095948	transcript	XR_002159974.1	pseudogene	12	n.1215+20870A>T
chrA1	139404245	A	T	PASS	T	intron_variant	MODIFIER	PTCD2	101095948	transcript	XM_019835337.1	protein_coding	9	c.928-27853A>T
chrA1	139753114	A	G	PASS	G	intergenic_region	MODIFIER	LOC101092488-TNPO1	101092488-101096201	intergenic_region	101092488-101096201		-1	n.139753114A>G
chrA1	139753115	C	T	PASS	T	intergenic_region	MODIFIER	LOC101092488-TNPO1	101092488-101096201	intergenic_region	101092488-101096201		-1	n.139753115C>T
chrA1	139753122	A	G	PASS	G	intergenic_region	MODIFIER	LOC101092488-TNPO1	101092488-101096201	intergenic_region	101092488-101096201		-1	n.139753122A>G
chrA1	140066685	G	A	PASS	A	downstream_gene_variant	MODIFIER	TMEM171	101096947	transcript	XM_003981071.4	protein_coding	-1	c.*3092G>A
chrA1	140066685	G	A	PASS	A	downstream_gene_variant	MODIFIER	TMEM171	101096947	transcript	XM_019835400.2	protein_coding	-1	c.*3092G>A
chrA1	140066685	G	A	PASS	A	intron_variant	MODIFIER	LOC111561405	111561405	transcript	XR_002743985.1	pseudogene	1	n.525-4100C>T
chrA1	140195713	T	C	PASS	C	non_coding_transcript_exon_variant	MODIFIER	LOC109501756	109501756	transcript	XR_002743643.1	pseudogene	3	n.223A>G
chrA1	140206555	C	G	PASS	G	intergenic_region	MODIFIER	LOC109501756-LOC109501767	109501756-109501767	intergenic_region	109501756-109501767		-1	n.140206555C>G
chrA1	140207821	G	GC	PASS	GC	intergenic_region	MODIFIER	LOC109501756-LOC109501767	109501756-109501767	intergenic_region	109501756-109501767		-1	n.140207821_140207822insC
chrA1	140207822	A	C	PASS	C	intergenic_region	MODIFIER	LOC109501756-LOC109501767	109501756-109501767	intergenic_region	109501756-109501767		-1	n.140207822A>C
chrA1	140207858	C	T	PASS	T	intergenic_region	MODIFIER	LOC109501756-LOC109501767	109501756-109501767	intergenic_region	109501756-109501767		-1	n.140207858C>T
chrA1	140209453	T	C	PASS	C	intergenic_region	MODIFIER	LOC109501756-LOC109501767	109501756-109501767	intergenic_region	109501756-109501767		-1	n.140209453T>C
chrA1	140209887	C	A	PASS	A	intergenic_region	MODIFIER	LOC109501756-LOC109501767	109501756-109501767	intergenic_region	109501756-109501767		-1	n.140209887C>A
chrA1	140215148	T	C	PASS	C	intergenic_region	MODIFIER	LOC109501756-LOC109501767	109501756-109501767	intergenic_region	109501756-109501767		-1	n.140215148T>C
chrA1	140216166	C	T	PASS	T	intergenic_region	MODIFIER	LOC109501756-LOC109501767	109501756-109501767	intergenic_region	109501756-109501767		-1	n.140216166C>T
chrA1	140224569	C	T	PASS	T	intergenic_region	MODIFIER	LOC109501756-LOC109501767	109501756-109501767	intergenic_region	109501756-109501767		-1	n.140224569C>T
chrA1	140226426	GC	G	PASS	G	intergenic_region	MODIFIER	LOC109501756-LOC109501767	109501756-109501767	intergenic_region	109501756-109501767		-1	n.140226427delC
chrA1	140226430	G	A	PASS	A	intergenic_region	MODIFIER	LOC109501756-LOC109501767	109501756-109501767	intergenic_region	109501756-109501767		-1	n.140226430G>A
chrA1	140227437	G	A	PASS	A	intergenic_region	MODIFIER	LOC109501756-LOC109501767	109501756-109501767	intergenic_region	109501756-109501767		-1	n.140227437G>A
chrA1	140229335	G	T	PASS	T	intergenic_region	MODIFIER	LOC109501756-LOC109501767	109501756-109501767	intergenic_region	109501756-109501767		-1	n.140229335G>T
chrA1	140229696	C	T	PASS	T	intergenic_region	MODIFIER	LOC109501756-LOC109501767	109501756-109501767	intergenic_region	109501756-109501767		-1	n.140229696C>T
chrA1	140233456	CATTTT	C	PASS	C	intergenic_region	MODIFIER	LOC109501756-LOC109501767	109501756-109501767	intergenic_region	109501756-109501767		-1	n.140233457_140233461delATTTT
chrA1	140233585	T	TGA	PASS	TGA	intergenic_region	MODIFIER	LOC109501756-LOC109501767	109501756-109501767	intergenic_region	109501756-109501767		-1	n.140233585_140233586insGA
chrA1	140237020	G	A	PASS	A	intergenic_region	MODIFIER	LOC109501756-LOC109501767	109501756-109501767	intergenic_region	109501756-109501767		-1	n.140237020G>A
chrA1	140243623	G	A	PASS	A	intergenic_region	MODIFIER	LOC109501756-LOC109501767	109501756-109501767	intergenic_region	109501756-109501767		-1	n.140243623G>A
chrA1	140243624	A	C	PASS	C	intergenic_region	MODIFIER	LOC109501756-LOC109501767	109501756-109501767	intergenic_region	109501756-109501767		-1	n.140243624A>C
chrA1	140251122	A	G	PASS	G	intergenic_region	MODIFIER	LOC109501756-LOC109501767	109501756-109501767	intergenic_region	109501756-109501767		-1	n.140251122A>G
chrA1	140253349	A	G	PASS	G	intergenic_region	MODIFIER	LOC109501756-LOC109501767	109501756-109501767	intergenic_region	109501756-109501767		-1	n.140253349A>G
chrA1	140257435	TCC	T	PASS	T	downstream_gene_variant	MODIFIER	LOC109501767	109501767	transcript	XR_002743997.1	pseudogene	-1	n.*2415_*2416delGG
chrA1	140257435	TCC	T	PASS	T	intergenic_region	MODIFIER	LOC109501756-LOC109501767	109501756-109501767	intergenic_region	109501756-109501767		-1	n.140257436_140257437delCC
chrA1	140257438	TTCCTTCCTTC	T	PASS	T	downstream_gene_variant	MODIFIER	LOC109501767	109501767	transcript	XR_002743997.1	pseudogene	-1	n.*2404_*2413delGAAGGAAGGA
chrA1	140257438	TTCCTTCCTTC	T	PASS	T	intergenic_region	MODIFIER	LOC109501756-LOC109501767	109501756-109501767	intergenic_region	109501756-109501767		-1	n.140257439_140257448delTCCTTCCTTC
chrA1	140270760	G	A	PASS	A	intron_variant	MODIFIER	LOC109501767	109501767	transcript	XR_002743997.1	pseudogene	3	n.1077+730C>T
chrA1	140271257	C	G	PASS	G	intron_variant	MODIFIER	LOC109501767	109501767	transcript	XR_002743997.1	pseudogene	3	n.1077+233G>C
chrA1	140278760	C	T	PASS	T	upstream_gene_variant	MODIFIER	LOC109501767	109501767	transcript	XR_002743997.1	pseudogene	-1	n.-1797G>A
chrA1	140278760	C	T	PASS	T	intergenic_region	MODIFIER	LOC109501767-FOXD1	109501767-105260767	intergenic_region	109501767-105260767		-1	n.140278760C>T
chrA1	140278846	C	G	PASS	G	upstream_gene_variant	MODIFIER	LOC109501767	109501767	transcript	XR_002743997.1	pseudogene	-1	n.-1883G>C
chrA1	140278846	C	G	PASS	G	intergenic_region	MODIFIER	LOC109501767-FOXD1	109501767-105260767	intergenic_region	109501767-105260767		-1	n.140278846C>G
chrA1	140280774	T	G	PASS	G	upstream_gene_variant	MODIFIER	LOC109501767	109501767	transcript	XR_002743997.1	pseudogene	-1	n.-3811A>C
chrA1	140280774	T	G	PASS	G	intergenic_region	MODIFIER	LOC109501767-FOXD1	109501767-105260767	intergenic_region	109501767-105260767		-1	n.140280774T>G
chrA1	140284915	G	C	PASS	C	intergenic_region	MODIFIER	LOC109501767-FOXD1	109501767-105260767	intergenic_region	109501767-105260767		-1	n.140284915G>C
chrA1	140285365	T	G	PASS	G	intergenic_region	MODIFIER	LOC109501767-FOXD1	109501767-105260767	intergenic_region	109501767-105260767		-1	n.140285365T>G
chrA1	140286105	T	C	PASS	C	intergenic_region	MODIFIER	LOC109501767-FOXD1	109501767-105260767	intergenic_region	109501767-105260767		-1	n.140286105T>C
chrA1	140468119	G	GTTTATTTATTTTGAGAGAGAGACAGAGTGGGAAGGGGCAGAGAGAGAAT	PASS	GTTTATTTATTTTGAGAGAGAGACAGAGTGGGAAGGGGCAGAGAGAGAAT	intergenic_region	MODIFIER	UTP15-ARHGEF28	101093914-101094325	intergenic_region	101093914-101094325		-1	n.140468119_140468120insTTTATTTATTTTGAGAGAGAGACAGAGTGGGAAGGGGCAGAGAGAGAAT
chrA1	140703386	G	A	PASS	A	intron_variant	MODIFIER	ARHGEF28	101094325	transcript	XM_011283815.3	protein_coding	9	c.1030+41286G>A
chrA1	140703386	G	A	PASS	A	intron_variant	MODIFIER	ARHGEF28	101094325	transcript	XM_019835471.2	protein_coding	1	c.85+21080G>A
chrA1	140724194	C	A	PASS	A	intron_variant	MODIFIER	ARHGEF28	101094325	transcript	XM_011283815.3	protein_coding	9	c.1031-24124C>A
chrA1	140724194	C	A	PASS	A	intron_variant	MODIFIER	ARHGEF28	101094325	transcript	XM_019835471.2	protein_coding	1	c.86-24124C>A
chrA1	140724195	G	T	PASS	T	intron_variant	MODIFIER	ARHGEF28	101094325	transcript	XM_011283815.3	protein_coding	9	c.1031-24123G>T
chrA1	140724195	G	T	PASS	T	intron_variant	MODIFIER	ARHGEF28	101094325	transcript	XM_019835471.2	protein_coding	1	c.86-24123G>T
chrA1	142677394	G	GGGT	PASS	GGGT	intron_variant	MODIFIER	SV2C	101100360	transcript	XM_003981081.5	protein_coding	1	c.-100+3249_-100+3250insGGT
chrA1	142934204	C	CGGGGGGGGGG	PASS	CGGGGGGGGGG	upstream_gene_variant	MODIFIER	IQGAP2	101082373	transcript	XM_011284171.3	protein_coding	-1	c.-1547_-1546insGGGGGGGGGG
chrA1	142934204	C	CGGGGGGGGGG	PASS	CGGGGGGGGGG	downstream_gene_variant	MODIFIER	LOC109501873	109501873	transcript	XR_002160220.2	pseudogene	-1	n.*1457_*1458insGGGGGGGGGG
chrA1	142934204	C	CGGGGGGGGGG	PASS	CGGGGGGGGGG	intergenic_region	MODIFIER	LOC109501873-IQGAP2	109501873-101082373	intergenic_region	109501873-101082373		-1	n.142934204_142934205insGGGGGGGGGG
chrA1	142935102	A	AAC	PASS	AAC	upstream_gene_variant	MODIFIER	IQGAP2	101082373	transcript	XM_011284171.3	protein_coding	-1	c.-649_-648insAC
chrA1	142935102	A	AAC	PASS	AAC	downstream_gene_variant	MODIFIER	LOC109501873	109501873	transcript	XR_002160220.2	pseudogene	-1	n.*2355_*2356insAC
chrA1	142935102	A	AAC	PASS	AAC	intergenic_region	MODIFIER	LOC109501873-IQGAP2	109501873-101082373	intergenic_region	109501873-101082373		-1	n.142935102_142935103insAC
chrA1	143235852	T	C	PASS	C	downstream_gene_variant	MODIFIER	IQGAP2	101082373	transcript	XM_011284171.3	protein_coding	-1	c.*2367T>C
chrA1	143235852	T	C	PASS	C	downstream_gene_variant	MODIFIER	IQGAP2	101082373	transcript	XM_019835759.2	protein_coding	-1	c.*2367T>C
chrA1	143235852	T	C	PASS	C	downstream_gene_variant	MODIFIER	IQGAP2	101082373	transcript	XM_019835765.2	protein_coding	-1	c.*2367T>C
chrA1	143235852	T	C	PASS	C	downstream_gene_variant	MODIFIER	IQGAP2	101082373	transcript	XM_006927800.4	protein_coding	-1	c.*2367T>C
chrA1	143235852	T	C	PASS	C	non_coding_transcript_exon_variant	MODIFIER	LOC101082625	101082625	transcript	101082625	pseudogene	1	n.261T>C
chrA1	143236746	A	G	PASS	G	downstream_gene_variant	MODIFIER	IQGAP2	101082373	transcript	XM_011284171.3	protein_coding	-1	c.*3261A>G
chrA1	143236746	A	G	PASS	G	downstream_gene_variant	MODIFIER	IQGAP2	101082373	transcript	XM_019835759.2	protein_coding	-1	c.*3261A>G
chrA1	143236746	A	G	PASS	G	downstream_gene_variant	MODIFIER	IQGAP2	101082373	transcript	XM_019835765.2	protein_coding	-1	c.*3261A>G
chrA1	143236746	A	G	PASS	G	downstream_gene_variant	MODIFIER	IQGAP2	101082373	transcript	XM_006927800.4	protein_coding	-1	c.*3261A>G
chrA1	143236746	A	G	PASS	G	non_coding_transcript_exon_variant	MODIFIER	LOC101082625	101082625	transcript	101082625	pseudogene	1	n.1155A>G
chrA1	143236989	T	C	PASS	C	downstream_gene_variant	MODIFIER	IQGAP2	101082373	transcript	XM_011284171.3	protein_coding	-1	c.*3504T>C
chrA1	143236989	T	C	PASS	C	downstream_gene_variant	MODIFIER	LOC101082625	101082625	transcript	101082625	pseudogene	-1	n.*9T>C
chrA1	143236989	T	C	PASS	C	downstream_gene_variant	MODIFIER	IQGAP2	101082373	transcript	XM_019835759.2	protein_coding	-1	c.*3504T>C
chrA1	143236989	T	C	PASS	C	downstream_gene_variant	MODIFIER	IQGAP2	101082373	transcript	XM_019835765.2	protein_coding	-1	c.*3504T>C
chrA1	143236989	T	C	PASS	C	downstream_gene_variant	MODIFIER	IQGAP2	101082373	transcript	XM_006927800.4	protein_coding	-1	c.*3504T>C
chrA1	143236989	T	C	PASS	C	intergenic_region	MODIFIER	LOC101082625-F2R	101082625-101100861	intergenic_region	101082625-101100861		-1	n.143236989T>C
chrA1	143238058	C	T	PASS	T	downstream_gene_variant	MODIFIER	IQGAP2	101082373	transcript	XM_011284171.3	protein_coding	-1	c.*4573C>T
chrA1	143238058	C	T	PASS	T	downstream_gene_variant	MODIFIER	LOC101082625	101082625	transcript	101082625	pseudogene	-1	n.*1078C>T
chrA1	143238058	C	T	PASS	T	downstream_gene_variant	MODIFIER	IQGAP2	101082373	transcript	XM_019835759.2	protein_coding	-1	c.*4573C>T
chrA1	143238058	C	T	PASS	T	downstream_gene_variant	MODIFIER	IQGAP2	101082373	transcript	XM_019835765.2	protein_coding	-1	c.*4573C>T
chrA1	143238058	C	T	PASS	T	downstream_gene_variant	MODIFIER	IQGAP2	101082373	transcript	XM_006927800.4	protein_coding	-1	c.*4573C>T
chrA1	143238058	C	T	PASS	T	intergenic_region	MODIFIER	LOC101082625-F2R	101082625-101100861	intergenic_region	101082625-101100861		-1	n.143238058C>T
chrA1	143238399	C	G	PASS	G	downstream_gene_variant	MODIFIER	IQGAP2	101082373	transcript	XM_011284171.3	protein_coding	-1	c.*4914C>G
chrA1	143238399	C	G	PASS	G	downstream_gene_variant	MODIFIER	LOC101082625	101082625	transcript	101082625	pseudogene	-1	n.*1419C>G
chrA1	143238399	C	G	PASS	G	downstream_gene_variant	MODIFIER	IQGAP2	101082373	transcript	XM_019835759.2	protein_coding	-1	c.*4914C>G
chrA1	143238399	C	G	PASS	G	downstream_gene_variant	MODIFIER	IQGAP2	101082373	transcript	XM_019835765.2	protein_coding	-1	c.*4914C>G
chrA1	143238399	C	G	PASS	G	downstream_gene_variant	MODIFIER	IQGAP2	101082373	transcript	XM_006927800.4	protein_coding	-1	c.*4914C>G
chrA1	143238399	C	G	PASS	G	intergenic_region	MODIFIER	LOC101082625-F2R	101082625-101100861	intergenic_region	101082625-101100861		-1	n.143238399C>G
chrA1	143248855	C	T	PASS	T	intron_variant	MODIFIER	F2R	101100861	transcript	XM_003981083.5	protein_coding	1	c.88+1906C>T
chrA1	143264240	C	T	PASS	T	downstream_gene_variant	MODIFIER	F2R	101100861	transcript	XM_003981083.5	protein_coding	-1	c.*2377C>T
chrA1	143264240	C	T	PASS	T	intergenic_region	MODIFIER	F2R-F2RL1	101100861-101082879	intergenic_region	101100861-101082879		-1	n.143264240C>T
chrA1	143295855	G	A	PASS	A	intergenic_region	MODIFIER	F2R-F2RL1	101100861-101082879	intergenic_region	101100861-101082879		-1	n.143295855G>A
chrA1	143295875	G	A	PASS	A	intergenic_region	MODIFIER	F2R-F2RL1	101100861-101082879	intergenic_region	101100861-101082879		-1	n.143295875G>A
chrA1	143354975	T	C	PASS	C	intergenic_region	MODIFIER	F2RL1-S100Z	101082879-101101106	intergenic_region	101082879-101101106		-1	n.143354975T>C
chrA1	143358308	T	C	PASS	C	intergenic_region	MODIFIER	F2RL1-S100Z	101082879-101101106	intergenic_region	101082879-101101106		-1	n.143358308T>C
chrA1	143358576	AAC	A	PASS	A	intergenic_region	MODIFIER	F2RL1-S100Z	101082879-101101106	intergenic_region	101082879-101101106		-1	n.143358577_143358578delAC
chrA1	143497734	A	G	PASS	G	splice_region_variant&intron_variant	LOW	AGGF1	101083397	transcript	XM_011284145.3	protein_coding	12	c.1841+3A>G
chrA1	143521517	A	G	PASS	G	5_prime_UTR_variant	MODIFIER	ZBED3	102902086	transcript	XM_023257734.1	protein_coding	3	c.-216T>C
chrA1	143521517	A	G	PASS	G	5_prime_UTR_variant	MODIFIER	ZBED3	102902086	transcript	XM_023257736.1	protein_coding	3	c.-216T>C
chrA1	143521517	A	G	PASS	G	5_prime_UTR_variant	MODIFIER	ZBED3	102902086	transcript	XM_023257719.1	protein_coding	2	c.-293T>C
chrA1	143521517	A	G	PASS	G	5_prime_UTR_variant	MODIFIER	ZBED3	102902086	transcript	XM_023257724.1	protein_coding	3	c.-216T>C
chrA1	143521517	A	G	PASS	G	5_prime_UTR_variant	MODIFIER	ZBED3	102902086	transcript	XM_023257729.1	protein_coding	3	c.-216T>C
chrA1	143521517	A	G	PASS	G	5_prime_UTR_variant	MODIFIER	ZBED3	102902086	transcript	XM_023257732.1	protein_coding	2	c.-216T>C
chrA1	143521517	A	G	PASS	G	5_prime_UTR_variant	MODIFIER	ZBED3	102902086	transcript	XM_023257749.1	protein_coding	2	c.-347T>C
chrA1	143521517	A	G	PASS	G	upstream_gene_variant	MODIFIER	ZBED3	102902086	transcript	XM_023257747.1	protein_coding	-1	c.-2583T>C
chrA1	143521517	A	G	PASS	G	upstream_gene_variant	MODIFIER	ZBED3	102902086	transcript	XM_023257743.1	protein_coding	-1	c.-2583T>C
chrA1	143521517	A	G	PASS	G	downstream_gene_variant	MODIFIER	LOC111557045	111557045	transcript	XR_002736796.1	pseudogene	-1	n.*138T>C
chrA1	143521517	A	G	PASS	G	intron_variant	MODIFIER	ZBED3	102902086	transcript	XM_023257717.1	protein_coding	1	c.-153-1571T>C
chrA1	143521517	A	G	PASS	G	intron_variant	MODIFIER	LOC102902047	102902047	transcript	XR_439529.4	pseudogene	1	n.104+2545A>G
chrA1	143521517	A	G	PASS	G	intron_variant	MODIFIER	ZBED3	102902086	transcript	XM_023257738.1	protein_coding	1	c.-192-101T>C
chrA1	143521517	A	G	PASS	G	intron_variant	MODIFIER	ZBED3	102902086	transcript	XM_023257741.1	protein_coding	2	c.-153-1571T>C
chrA1	143521720	G	GA	PASS	GA	5_prime_UTR_variant	MODIFIER	ZBED3	102902086	transcript	XM_023257719.1	protein_coding	2	c.-497_-496insT
chrA1	143521720	G	GA	PASS	GA	5_prime_UTR_variant	MODIFIER	ZBED3	102902086	transcript	XM_023257729.1	protein_coding	3	c.-420_-419insT
chrA1	143521720	G	GA	PASS	GA	5_prime_UTR_variant	MODIFIER	ZBED3	102902086	transcript	XM_023257749.1	protein_coding	2	c.-551_-550insT
chrA1	143521720	G	GA	PASS	GA	upstream_gene_variant	MODIFIER	ZBED3	102902086	transcript	XM_023257747.1	protein_coding	-1	c.-2787_-2786insT
chrA1	143521720	G	GA	PASS	GA	upstream_gene_variant	MODIFIER	ZBED3	102902086	transcript	XM_023257743.1	protein_coding	-1	c.-2787_-2786insT
chrA1	143521720	G	GA	PASS	GA	intron_variant	MODIFIER	ZBED3	102902086	transcript	XM_023257717.1	protein_coding	1	c.-153-1775_-153-1774insT
chrA1	143521720	G	GA	PASS	GA	intron_variant	MODIFIER	LOC102902047	102902047	transcript	XR_439529.4	pseudogene	1	n.104+2748_104+2749insA
chrA1	143521720	G	GA	PASS	GA	intron_variant	MODIFIER	ZBED3	102902086	transcript	XM_023257738.1	protein_coding	1	c.-192-305_-192-304insT
chrA1	143521720	G	GA	PASS	GA	intron_variant	MODIFIER	ZBED3	102902086	transcript	XM_023257734.1	protein_coding	2	c.-226-194_-226-193insT
chrA1	143521720	G	GA	PASS	GA	intron_variant	MODIFIER	ZBED3	102902086	transcript	XM_023257736.1	protein_coding	2	c.-226-194_-226-193insT
chrA1	143521720	G	GA	PASS	GA	intron_variant	MODIFIER	ZBED3	102902086	transcript	XM_023257741.1	protein_coding	2	c.-153-1775_-153-1774insT
chrA1	143521720	G	GA	PASS	GA	intron_variant	MODIFIER	ZBED3	102902086	transcript	XM_023257724.1	protein_coding	2	c.-226-194_-226-193insT
chrA1	143521720	G	GA	PASS	GA	intron_variant	MODIFIER	ZBED3	102902086	transcript	XM_023257732.1	protein_coding	1	c.-226-194_-226-193insT
chrA1	143521720	G	GA	PASS	GA	non_coding_transcript_exon_variant	MODIFIER	LOC111557045	111557045	transcript	XR_002736796.1	pseudogene	1	n.72_73insT
chrA1	143521721	C	A	PASS	A	5_prime_UTR_variant	MODIFIER	ZBED3	102902086	transcript	XM_023257719.1	protein_coding	2	c.-497G>T
chrA1	143521721	C	A	PASS	A	5_prime_UTR_variant	MODIFIER	ZBED3	102902086	transcript	XM_023257729.1	protein_coding	3	c.-420G>T
chrA1	143521721	C	A	PASS	A	5_prime_UTR_variant	MODIFIER	ZBED3	102902086	transcript	XM_023257749.1	protein_coding	2	c.-551G>T
chrA1	143521721	C	A	PASS	A	upstream_gene_variant	MODIFIER	ZBED3	102902086	transcript	XM_023257747.1	protein_coding	-1	c.-2787G>T
chrA1	143521721	C	A	PASS	A	upstream_gene_variant	MODIFIER	ZBED3	102902086	transcript	XM_023257743.1	protein_coding	-1	c.-2787G>T
chrA1	143521721	C	A	PASS	A	intron_variant	MODIFIER	ZBED3	102902086	transcript	XM_023257717.1	protein_coding	1	c.-153-1775G>T
chrA1	143521721	C	A	PASS	A	intron_variant	MODIFIER	LOC102902047	102902047	transcript	XR_439529.4	pseudogene	1	n.104+2749C>A
chrA1	143521721	C	A	PASS	A	intron_variant	MODIFIER	ZBED3	102902086	transcript	XM_023257738.1	protein_coding	1	c.-192-305G>T
chrA1	143521721	C	A	PASS	A	intron_variant	MODIFIER	ZBED3	102902086	transcript	XM_023257734.1	protein_coding	2	c.-226-194G>T
chrA1	143521721	C	A	PASS	A	intron_variant	MODIFIER	ZBED3	102902086	transcript	XM_023257736.1	protein_coding	2	c.-226-194G>T
chrA1	143521721	C	A	PASS	A	intron_variant	MODIFIER	ZBED3	102902086	transcript	XM_023257741.1	protein_coding	2	c.-153-1775G>T
chrA1	143521721	C	A	PASS	A	intron_variant	MODIFIER	ZBED3	102902086	transcript	XM_023257724.1	protein_coding	2	c.-226-194G>T
chrA1	143521721	C	A	PASS	A	intron_variant	MODIFIER	ZBED3	102902086	transcript	XM_023257732.1	protein_coding	1	c.-226-194G>T
chrA1	143521721	C	A	PASS	A	non_coding_transcript_exon_variant	MODIFIER	LOC111557045	111557045	transcript	XR_002736796.1	pseudogene	1	n.72G>T
chrA1	143606700	T	C	PASS	C	intergenic_region	MODIFIER	LOC102902047-PDE8B	102902047-101083652	intergenic_region	102902047-101083652		-1	n.143606700T>C
chrA1	143869823	C	T	PASS	T	downstream_gene_variant	MODIFIER	WDR41	101101360	transcript	XM_019835839.2	protein_coding	-1	c.*7681G>A
chrA1	143869823	C	T	PASS	T	downstream_gene_variant	MODIFIER	WDR41	101101360	transcript	XM_019835848.2	protein_coding	-1	c.*7681G>A
chrA1	143869823	C	T	PASS	T	downstream_gene_variant	MODIFIER	WDR41	101101360	transcript	XM_019835852.2	protein_coding	-1	c.*7681G>A
chrA1	143869823	C	T	PASS	T	downstream_gene_variant	MODIFIER	WDR41	101101360	transcript	XM_019835844.2	protein_coding	-1	c.*7681G>A
chrA1	143869823	C	T	PASS	T	downstream_gene_variant	MODIFIER	WDR41	101101360	transcript	XR_002160247.2	pseudogene	-1	n.*4624G>A
chrA1	143869823	C	T	PASS	T	downstream_gene_variant	MODIFIER	WDR41	101101360	transcript	XM_019835843.2	protein_coding	-1	c.*7681G>A
chrA1	143869823	C	T	PASS	T	intron_variant	MODIFIER	PDE8B	101083652	transcript	XM_019835832.2	protein_coding	20	c.2266-810C>T
chrA1	143986603	G	A	PASS	A	intron_variant	MODIFIER	WDR41	101101360	transcript	XM_019835839.2	protein_coding	3	c.148-62899C>T
chrA1	143986603	G	A	PASS	A	intron_variant	MODIFIER	WDR41	101101360	transcript	XM_019835844.2	protein_coding	2	c.118-62899C>T
chrA1	143986603	G	A	PASS	A	intron_variant	MODIFIER	WDR41	101101360	transcript	XR_002160247.2	pseudogene	3	n.390-62899C>T
chrA1	143986603	G	A	PASS	A	intron_variant	MODIFIER	WDR41	101101360	transcript	XM_019835843.2	protein_coding	3	c.148-62899C>T
chrA1	144278236	C	T	PASS	T	intergenic_region	MODIFIER	TBCA-LOC111561470	101083906-111561470	intergenic_region	101083906-111561470		-1	n.144278236C>T
chrA1	144515347	G	A	PASS	A	intron_variant	MODIFIER	AP3B1	105260768	transcript	XM_023257772.1	protein_coding	18	c.2077+882C>T
chrA1	144515347	G	A	PASS	A	intron_variant	MODIFIER	AP3B1	105260768	transcript	XM_011284118.3	protein_coding	18	c.2077+882C>T
chrA1	144515347	G	A	PASS	A	intron_variant	MODIFIER	AP3B1	105260768	transcript	XM_023257774.1	protein_coding	18	c.2077+882C>T
chrA1	144515347	G	A	PASS	A	intron_variant	MODIFIER	AP3B1	105260768	transcript	XM_023257780.1	protein_coding	18	c.2077+882C>T
chrA1	144540047	T	TTTTTAATTGTTTTTTCA	PASS	TTTTTAATTGTTTTTTCA	intron_variant	MODIFIER	AP3B1	105260768	transcript	XM_023257772.1	protein_coding	14	c.1473+4409_1473+4410insTGAAAAAACAATTAAAA
chrA1	144540047	T	TTTTTAATTGTTTTTTCA	PASS	TTTTTAATTGTTTTTTCA	intron_variant	MODIFIER	AP3B1	105260768	transcript	XM_011284118.3	protein_coding	14	c.1473+4409_1473+4410insTGAAAAAACAATTAAAA
chrA1	144540047	T	TTTTTAATTGTTTTTTCA	PASS	TTTTTAATTGTTTTTTCA	intron_variant	MODIFIER	AP3B1	105260768	transcript	XM_023257774.1	protein_coding	14	c.1473+4409_1473+4410insTGAAAAAACAATTAAAA
chrA1	144540047	T	TTTTTAATTGTTTTTTCA	PASS	TTTTTAATTGTTTTTTCA	intron_variant	MODIFIER	AP3B1	105260768	transcript	XM_023257780.1	protein_coding	14	c.1473+4409_1473+4410insTGAAAAAACAATTAAAA
chrA1	144648719	C	G	PASS	G	intron_variant	MODIFIER	AP3B1	105260768	transcript	XM_023257772.1	protein_coding	1	c.129-4417G>C
chrA1	144648719	C	G	PASS	G	intron_variant	MODIFIER	AP3B1	105260768	transcript	XM_011284118.3	protein_coding	1	c.129-4417G>C
chrA1	144648719	C	G	PASS	G	intron_variant	MODIFIER	AP3B1	105260768	transcript	XM_023257774.1	protein_coding	1	c.129-4417G>C
chrA1	144648719	C	G	PASS	G	intron_variant	MODIFIER	AP3B1	105260768	transcript	XM_023257780.1	protein_coding	1	c.129-4417G>C
chrA1	144809548	T	C	PASS	C	intron_variant	MODIFIER	SCAMP1	101080863	transcript	XM_003981088.5	protein_coding	6	c.632+11298T>C
chrA1	144809548	T	C	PASS	C	intron_variant	MODIFIER	SCAMP1	101080863	transcript	XM_019835860.2	protein_coding	5	c.554+11298T>C
chrA1	145116390	G	A	PASS	A	intergenic_region	MODIFIER	LOC109502658-ARSB	109502658-100216331	intergenic_region	109502658-100216331		-1	n.145116390G>A
chrA1	145921667	T	TCC	PASS	TCC	intron_variant	MODIFIER	PAPD4	101086285	transcript	XM_006927811.4	protein_coding	11	c.1027+1299_1027+1300insCC
chrA1	145921667	T	TCC	PASS	TCC	intron_variant	MODIFIER	PAPD4	101086285	transcript	XM_006927813.4	protein_coding	10	c.1027+1299_1027+1300insCC
chrA1	145921667	T	TCC	PASS	TCC	intron_variant	MODIFIER	PAPD4	101086285	transcript	XM_006927812.4	protein_coding	11	c.1027+1299_1027+1300insCC
chrA1	145921667	T	TCC	PASS	TCC	intron_variant	MODIFIER	PAPD4	101086285	transcript	XM_006927814.4	protein_coding	10	c.1015+1299_1015+1300insCC
chrA1	145921675	T	C	PASS	C	intron_variant	MODIFIER	PAPD4	101086285	transcript	XM_006927811.4	protein_coding	11	c.1027+1307T>C
chrA1	145921675	T	C	PASS	C	intron_variant	MODIFIER	PAPD4	101086285	transcript	XM_006927813.4	protein_coding	10	c.1027+1307T>C
chrA1	145921675	T	C	PASS	C	intron_variant	MODIFIER	PAPD4	101086285	transcript	XM_006927812.4	protein_coding	11	c.1027+1307T>C
chrA1	145921675	T	C	PASS	C	intron_variant	MODIFIER	PAPD4	101086285	transcript	XM_006927814.4	protein_coding	10	c.1015+1307T>C
chrA1	146270200	C	G	PASS	G	intron_variant	MODIFIER	THBS4	101087199	transcript	XM_003981108.5	protein_coding	2	c.293-11C>G
chrA1	146278337	A	G	PASS	G	intron_variant	MODIFIER	THBS4	101087199	transcript	XM_003981108.5	protein_coding	8	c.1135-745A>G
chrA1	146279833	G	A	PASS	A	intron_variant	MODIFIER	THBS4	101087199	transcript	XM_003981108.5	protein_coding	9	c.1203+683G>A
chrA1	146583344	G	A	PASS	A	intron_variant	MODIFIER	ZFYVE16	101087448	transcript	XM_003981109.5	protein_coding	7	c.3095-176G>A
chrA1	146583344	G	A	PASS	A	intron_variant	MODIFIER	ZFYVE16	101087448	transcript	XM_006927816.4	protein_coding	7	c.3095-176G>A
chrA1	146583344	G	A	PASS	A	intron_variant	MODIFIER	ZFYVE16	101087448	transcript	XM_019836035.2	protein_coding	8	c.3095-176G>A
chrA1	146583344	G	A	PASS	A	intron_variant	MODIFIER	ZFYVE16	101087448	transcript	XM_019836033.2	protein_coding	8	c.3095-176G>A
chrA1	146661375	A	G	PASS	G	downstream_gene_variant	MODIFIER	FAM151B	101090415	transcript	XM_023257854.1	protein_coding	-1	c.*3728A>G
chrA1	146661375	A	G	PASS	G	downstream_gene_variant	MODIFIER	FAM151B	101090415	transcript	XM_023257863.1	protein_coding	-1	c.*3877A>G
chrA1	146661375	A	G	PASS	G	intron_variant	MODIFIER	FAM151B	101090415	transcript	XM_023257858.1	protein_coding	6	c.775+3043A>G
chrA1	146661375	A	G	PASS	G	intron_variant	MODIFIER	FAM151B	101090415	transcript	XR_002744248.1	pseudogene	6	n.1512+3043A>G
chrA1	146661375	A	G	PASS	G	intron_variant	MODIFIER	FAM151B	101090415	transcript	XM_023257859.1	protein_coding	6	c.776-1208A>G
chrA1	146661375	A	G	PASS	G	intron_variant	MODIFIER	FAM151B	101090415	transcript	XR_002744249.1	pseudogene	6	n.1180-1208A>G
chrA1	146664411	T	A	PASS	A	downstream_gene_variant	MODIFIER	FAM151B	101090415	transcript	XM_023257859.1	protein_coding	-1	c.*1815T>A
chrA1	146664411	T	A	PASS	A	intron_variant	MODIFIER	FAM151B	101090415	transcript	XM_023257858.1	protein_coding	6	c.776-2354T>A
chrA1	146664411	T	A	PASS	A	intron_variant	MODIFIER	FAM151B	101090415	transcript	XR_002744248.1	pseudogene	6	n.1513-2354T>A
chrA1	146664411	T	A	PASS	A	intron_variant	MODIFIER	FAM151B	101090415	transcript	XR_002744249.1	pseudogene	7	n.1274+1734T>A
chrA1	146880986	G	A	PASS	A	intron_variant	MODIFIER	MSH3	101090919	transcript	XM_003981121.5	protein_coding	19	c.2629-8085G>A
chrA1	146880986	G	A	PASS	A	intron_variant	MODIFIER	MSH3	101090919	transcript	XR_002160390.2	pseudogene	19	n.2661-8085G>A
chrA1	146880986	G	A	PASS	A	intron_variant	MODIFIER	MSH3	101090919	transcript	XR_002160393.2	pseudogene	19	n.2661-8085G>A
chrA1	146880986	G	A	PASS	A	intron_variant	MODIFIER	MSH3	101090919	transcript	XM_006927817.4	protein_coding	19	c.2626-8085G>A
chrA1	146880986	G	A	PASS	A	intron_variant	MODIFIER	MSH3	101090919	transcript	XM_019836078.2	protein_coding	19	c.2629-8085G>A
chrA1	146895312	T	TC	PASS	TC	intron_variant	MODIFIER	MSH3	101090919	transcript	XM_003981121.5	protein_coding	20	c.2786+6084_2786+6085insC
chrA1	146895312	T	TC	PASS	TC	intron_variant	MODIFIER	MSH3	101090919	transcript	XR_002160390.2	pseudogene	20	n.2818+6084_2818+6085insC
chrA1	146895312	T	TC	PASS	TC	intron_variant	MODIFIER	MSH3	101090919	transcript	XR_002160393.2	pseudogene	20	n.2818+6084_2818+6085insC
chrA1	146895312	T	TC	PASS	TC	intron_variant	MODIFIER	MSH3	101090919	transcript	XM_006927817.4	protein_coding	20	c.2783+6084_2783+6085insC
chrA1	146895312	T	TC	PASS	TC	intron_variant	MODIFIER	MSH3	101090919	transcript	XM_019836078.2	protein_coding	20	c.2786+6084_2786+6085insC
chrA1	146952396	C	T	PASS	T	intergenic_region	MODIFIER	MSH3-RASGRF2	101090919-101091172	intergenic_region	101090919-101091172		-1	n.146952396C>T
chrA1	146976118	G	A	PASS	A	5_prime_UTR_variant	MODIFIER	RASGRF2	101091172	transcript	XM_023257887.1	protein_coding	1	c.-721G>A
chrA1	146976118	G	A	PASS	A	5_prime_UTR_variant	MODIFIER	RASGRF2	101091172	transcript	XM_023257908.1	protein_coding	1	c.-721G>A
chrA1	146976118	G	A	PASS	A	5_prime_UTR_variant	MODIFIER	RASGRF2	101091172	transcript	XM_023257891.1	protein_coding	1	c.-721G>A
chrA1	146976118	G	A	PASS	A	5_prime_UTR_variant	MODIFIER	RASGRF2	101091172	transcript	XM_023257915.1	protein_coding	1	c.-721G>A
chrA1	146976118	G	A	PASS	A	5_prime_UTR_variant	MODIFIER	RASGRF2	101091172	transcript	XM_023257899.1	protein_coding	1	c.-721G>A
chrA1	146979641	C	G	PASS	G	intron_variant	MODIFIER	RASGRF2	101091172	transcript	XM_023257887.1	protein_coding	1	c.288+2515C>G
chrA1	146979641	C	G	PASS	G	intron_variant	MODIFIER	RASGRF2	101091172	transcript	XM_023257908.1	protein_coding	1	c.288+2515C>G
chrA1	146979641	C	G	PASS	G	intron_variant	MODIFIER	RASGRF2	101091172	transcript	XM_023257891.1	protein_coding	1	c.288+2515C>G
chrA1	146979641	C	G	PASS	G	intron_variant	MODIFIER	RASGRF2	101091172	transcript	XM_023257915.1	protein_coding	1	c.288+2515C>G
chrA1	146979641	C	G	PASS	G	intron_variant	MODIFIER	RASGRF2	101091172	transcript	XM_023257899.1	protein_coding	1	c.288+2515C>G
chrA1	146985826	G	C	PASS	C	intron_variant	MODIFIER	RASGRF2	101091172	transcript	XM_023257887.1	protein_coding	1	c.288+8700G>C
chrA1	146985826	G	C	PASS	C	intron_variant	MODIFIER	RASGRF2	101091172	transcript	XM_023257908.1	protein_coding	1	c.288+8700G>C
chrA1	146985826	G	C	PASS	C	intron_variant	MODIFIER	RASGRF2	101091172	transcript	XM_023257891.1	protein_coding	1	c.288+8700G>C
chrA1	146985826	G	C	PASS	C	intron_variant	MODIFIER	RASGRF2	101091172	transcript	XM_023257915.1	protein_coding	1	c.288+8700G>C
chrA1	146985826	G	C	PASS	C	intron_variant	MODIFIER	RASGRF2	101091172	transcript	XM_023257899.1	protein_coding	1	c.288+8700G>C
chrA1	146990813	G	T	PASS	T	intron_variant	MODIFIER	RASGRF2	101091172	transcript	XM_023257887.1	protein_coding	1	c.288+13687G>T
chrA1	146990813	G	T	PASS	T	intron_variant	MODIFIER	RASGRF2	101091172	transcript	XM_023257908.1	protein_coding	1	c.288+13687G>T
chrA1	146990813	G	T	PASS	T	intron_variant	MODIFIER	RASGRF2	101091172	transcript	XM_023257891.1	protein_coding	1	c.288+13687G>T
chrA1	146990813	G	T	PASS	T	intron_variant	MODIFIER	RASGRF2	101091172	transcript	XM_023257915.1	protein_coding	1	c.288+13687G>T
chrA1	146990813	G	T	PASS	T	intron_variant	MODIFIER	RASGRF2	101091172	transcript	XM_023257899.1	protein_coding	1	c.288+13687G>T
chrA1	146993688	C	T	PASS	T	intron_variant	MODIFIER	RASGRF2	101091172	transcript	XM_023257887.1	protein_coding	1	c.288+16562C>T
chrA1	146993688	C	T	PASS	T	intron_variant	MODIFIER	RASGRF2	101091172	transcript	XM_023257908.1	protein_coding	1	c.288+16562C>T
chrA1	146993688	C	T	PASS	T	intron_variant	MODIFIER	RASGRF2	101091172	transcript	XM_023257891.1	protein_coding	1	c.288+16562C>T
chrA1	146993688	C	T	PASS	T	intron_variant	MODIFIER	RASGRF2	101091172	transcript	XM_023257915.1	protein_coding	1	c.288+16562C>T
chrA1	146993688	C	T	PASS	T	intron_variant	MODIFIER	RASGRF2	101091172	transcript	XM_023257899.1	protein_coding	1	c.288+16562C>T
chrA1	146995308	T	G	PASS	G	intron_variant	MODIFIER	RASGRF2	101091172	transcript	XM_023257887.1	protein_coding	1	c.288+18182T>G
chrA1	146995308	T	G	PASS	G	intron_variant	MODIFIER	RASGRF2	101091172	transcript	XM_023257908.1	protein_coding	1	c.288+18182T>G
chrA1	146995308	T	G	PASS	G	intron_variant	MODIFIER	RASGRF2	101091172	transcript	XM_023257891.1	protein_coding	1	c.288+18182T>G
chrA1	146995308	T	G	PASS	G	intron_variant	MODIFIER	RASGRF2	101091172	transcript	XM_023257915.1	protein_coding	1	c.288+18182T>G
chrA1	146995308	T	G	PASS	G	intron_variant	MODIFIER	RASGRF2	101091172	transcript	XM_023257899.1	protein_coding	1	c.288+18182T>G
chrA1	146997421	CTGTT	C	PASS	C	intron_variant	MODIFIER	RASGRF2	101091172	transcript	XM_023257887.1	protein_coding	1	c.288+20296_288+20299delTGTT
chrA1	146997421	CTGTT	C	PASS	C	intron_variant	MODIFIER	RASGRF2	101091172	transcript	XM_023257908.1	protein_coding	1	c.288+20296_288+20299delTGTT
chrA1	146997421	CTGTT	C	PASS	C	intron_variant	MODIFIER	RASGRF2	101091172	transcript	XM_023257891.1	protein_coding	1	c.288+20296_288+20299delTGTT
chrA1	146997421	CTGTT	C	PASS	C	intron_variant	MODIFIER	RASGRF2	101091172	transcript	XM_023257915.1	protein_coding	1	c.288+20296_288+20299delTGTT
chrA1	146997421	CTGTT	C	PASS	C	intron_variant	MODIFIER	RASGRF2	101091172	transcript	XM_023257899.1	protein_coding	1	c.288+20296_288+20299delTGTT
chrA1	146998654	G	A	PASS	A	intron_variant	MODIFIER	RASGRF2	101091172	transcript	XM_023257887.1	protein_coding	1	c.288+21528G>A
chrA1	146998654	G	A	PASS	A	intron_variant	MODIFIER	RASGRF2	101091172	transcript	XM_023257908.1	protein_coding	1	c.288+21528G>A
chrA1	146998654	G	A	PASS	A	intron_variant	MODIFIER	RASGRF2	101091172	transcript	XM_023257891.1	protein_coding	1	c.288+21528G>A
chrA1	146998654	G	A	PASS	A	intron_variant	MODIFIER	RASGRF2	101091172	transcript	XM_023257915.1	protein_coding	1	c.288+21528G>A
chrA1	146998654	G	A	PASS	A	intron_variant	MODIFIER	RASGRF2	101091172	transcript	XM_023257899.1	protein_coding	1	c.288+21528G>A
chrA1	146999807	C	T	PASS	T	intron_variant	MODIFIER	RASGRF2	101091172	transcript	XM_023257887.1	protein_coding	1	c.288+22681C>T
chrA1	146999807	C	T	PASS	T	intron_variant	MODIFIER	RASGRF2	101091172	transcript	XM_023257908.1	protein_coding	1	c.288+22681C>T
chrA1	146999807	C	T	PASS	T	intron_variant	MODIFIER	RASGRF2	101091172	transcript	XM_023257891.1	protein_coding	1	c.288+22681C>T
chrA1	146999807	C	T	PASS	T	intron_variant	MODIFIER	RASGRF2	101091172	transcript	XM_023257915.1	protein_coding	1	c.288+22681C>T
chrA1	146999807	C	T	PASS	T	intron_variant	MODIFIER	RASGRF2	101091172	transcript	XM_023257899.1	protein_coding	1	c.288+22681C>T
chrA1	147001688	T	C	PASS	C	intron_variant	MODIFIER	RASGRF2	101091172	transcript	XM_023257887.1	protein_coding	1	c.288+24562T>C
chrA1	147001688	T	C	PASS	C	intron_variant	MODIFIER	RASGRF2	101091172	transcript	XM_023257908.1	protein_coding	1	c.288+24562T>C
chrA1	147001688	T	C	PASS	C	intron_variant	MODIFIER	RASGRF2	101091172	transcript	XM_023257891.1	protein_coding	1	c.288+24562T>C
chrA1	147001688	T	C	PASS	C	intron_variant	MODIFIER	RASGRF2	101091172	transcript	XM_023257915.1	protein_coding	1	c.288+24562T>C
chrA1	147001688	T	C	PASS	C	intron_variant	MODIFIER	RASGRF2	101091172	transcript	XM_023257899.1	protein_coding	1	c.288+24562T>C
chrA1	147002994	C	T	PASS	T	intron_variant	MODIFIER	RASGRF2	101091172	transcript	XM_023257887.1	protein_coding	1	c.288+25868C>T
chrA1	147002994	C	T	PASS	T	intron_variant	MODIFIER	RASGRF2	101091172	transcript	XM_023257908.1	protein_coding	1	c.288+25868C>T
chrA1	147002994	C	T	PASS	T	intron_variant	MODIFIER	RASGRF2	101091172	transcript	XM_023257891.1	protein_coding	1	c.288+25868C>T
chrA1	147002994	C	T	PASS	T	intron_variant	MODIFIER	RASGRF2	101091172	transcript	XM_023257915.1	protein_coding	1	c.288+25868C>T
chrA1	147002994	C	T	PASS	T	intron_variant	MODIFIER	RASGRF2	101091172	transcript	XM_023257899.1	protein_coding	1	c.288+25868C>T
chrA1	147004645	C	T	PASS	T	intron_variant	MODIFIER	RASGRF2	101091172	transcript	XM_023257887.1	protein_coding	1	c.288+27519C>T
chrA1	147004645	C	T	PASS	T	intron_variant	MODIFIER	RASGRF2	101091172	transcript	XM_023257908.1	protein_coding	1	c.288+27519C>T
chrA1	147004645	C	T	PASS	T	intron_variant	MODIFIER	RASGRF2	101091172	transcript	XM_023257891.1	protein_coding	1	c.288+27519C>T
chrA1	147004645	C	T	PASS	T	intron_variant	MODIFIER	RASGRF2	101091172	transcript	XM_023257915.1	protein_coding	1	c.288+27519C>T
chrA1	147004645	C	T	PASS	T	intron_variant	MODIFIER	RASGRF2	101091172	transcript	XM_023257899.1	protein_coding	1	c.288+27519C>T
chrA1	147005603	G	A	PASS	A	intron_variant	MODIFIER	RASGRF2	101091172	transcript	XM_023257887.1	protein_coding	1	c.288+28477G>A
chrA1	147005603	G	A	PASS	A	intron_variant	MODIFIER	RASGRF2	101091172	transcript	XM_023257908.1	protein_coding	1	c.288+28477G>A
chrA1	147005603	G	A	PASS	A	intron_variant	MODIFIER	RASGRF2	101091172	transcript	XM_023257891.1	protein_coding	1	c.288+28477G>A
chrA1	147005603	G	A	PASS	A	intron_variant	MODIFIER	RASGRF2	101091172	transcript	XM_023257915.1	protein_coding	1	c.288+28477G>A
chrA1	147005603	G	A	PASS	A	intron_variant	MODIFIER	RASGRF2	101091172	transcript	XM_023257899.1	protein_coding	1	c.288+28477G>A
chrA1	147005671	AC	A	PASS	A	intron_variant	MODIFIER	RASGRF2	101091172	transcript	XM_023257887.1	protein_coding	1	c.288+28546delC
chrA1	147005671	AC	A	PASS	A	intron_variant	MODIFIER	RASGRF2	101091172	transcript	XM_023257908.1	protein_coding	1	c.288+28546delC
chrA1	147005671	AC	A	PASS	A	intron_variant	MODIFIER	RASGRF2	101091172	transcript	XM_023257891.1	protein_coding	1	c.288+28546delC
chrA1	147005671	AC	A	PASS	A	intron_variant	MODIFIER	RASGRF2	101091172	transcript	XM_023257915.1	protein_coding	1	c.288+28546delC
chrA1	147005671	AC	A	PASS	A	intron_variant	MODIFIER	RASGRF2	101091172	transcript	XM_023257899.1	protein_coding	1	c.288+28546delC
chrA1	147005675	C	T	PASS	T	intron_variant	MODIFIER	RASGRF2	101091172	transcript	XM_023257887.1	protein_coding	1	c.288+28549C>T
chrA1	147005675	C	T	PASS	T	intron_variant	MODIFIER	RASGRF2	101091172	transcript	XM_023257908.1	protein_coding	1	c.288+28549C>T
chrA1	147005675	C	T	PASS	T	intron_variant	MODIFIER	RASGRF2	101091172	transcript	XM_023257891.1	protein_coding	1	c.288+28549C>T
chrA1	147005675	C	T	PASS	T	intron_variant	MODIFIER	RASGRF2	101091172	transcript	XM_023257915.1	protein_coding	1	c.288+28549C>T
chrA1	147005675	C	T	PASS	T	intron_variant	MODIFIER	RASGRF2	101091172	transcript	XM_023257899.1	protein_coding	1	c.288+28549C>T
chrA1	147007429	G	T	PASS	T	intron_variant	MODIFIER	RASGRF2	101091172	transcript	XM_023257887.1	protein_coding	1	c.288+30303G>T
chrA1	147007429	G	T	PASS	T	intron_variant	MODIFIER	RASGRF2	101091172	transcript	XM_023257908.1	protein_coding	1	c.288+30303G>T
chrA1	147007429	G	T	PASS	T	intron_variant	MODIFIER	RASGRF2	101091172	transcript	XM_023257891.1	protein_coding	1	c.288+30303G>T
chrA1	147007429	G	T	PASS	T	intron_variant	MODIFIER	RASGRF2	101091172	transcript	XM_023257915.1	protein_coding	1	c.288+30303G>T
chrA1	147007429	G	T	PASS	T	intron_variant	MODIFIER	RASGRF2	101091172	transcript	XM_023257899.1	protein_coding	1	c.288+30303G>T
chrA1	147007884	AT	A	PASS	A	intron_variant	MODIFIER	RASGRF2	101091172	transcript	XM_023257887.1	protein_coding	1	c.288+30759delT
chrA1	147007884	AT	A	PASS	A	intron_variant	MODIFIER	RASGRF2	101091172	transcript	XM_023257908.1	protein_coding	1	c.288+30759delT
chrA1	147007884	AT	A	PASS	A	intron_variant	MODIFIER	RASGRF2	101091172	transcript	XM_023257891.1	protein_coding	1	c.288+30759delT
chrA1	147007884	AT	A	PASS	A	intron_variant	MODIFIER	RASGRF2	101091172	transcript	XM_023257915.1	protein_coding	1	c.288+30759delT
chrA1	147007884	AT	A	PASS	A	intron_variant	MODIFIER	RASGRF2	101091172	transcript	XM_023257899.1	protein_coding	1	c.288+30759delT
chrA1	147009949	G	A	PASS	A	intron_variant	MODIFIER	RASGRF2	101091172	transcript	XM_023257887.1	protein_coding	1	c.288+32823G>A
chrA1	147009949	G	A	PASS	A	intron_variant	MODIFIER	RASGRF2	101091172	transcript	XM_023257908.1	protein_coding	1	c.288+32823G>A
chrA1	147009949	G	A	PASS	A	intron_variant	MODIFIER	RASGRF2	101091172	transcript	XM_023257891.1	protein_coding	1	c.288+32823G>A
chrA1	147009949	G	A	PASS	A	intron_variant	MODIFIER	RASGRF2	101091172	transcript	XM_023257915.1	protein_coding	1	c.288+32823G>A
chrA1	147009949	G	A	PASS	A	intron_variant	MODIFIER	RASGRF2	101091172	transcript	XM_023257899.1	protein_coding	1	c.288+32823G>A
chrA1	147010230	C	G	PASS	G	intron_variant	MODIFIER	RASGRF2	101091172	transcript	XM_023257887.1	protein_coding	1	c.288+33104C>G
chrA1	147010230	C	G	PASS	G	intron_variant	MODIFIER	RASGRF2	101091172	transcript	XM_023257908.1	protein_coding	1	c.288+33104C>G
chrA1	147010230	C	G	PASS	G	intron_variant	MODIFIER	RASGRF2	101091172	transcript	XM_023257891.1	protein_coding	1	c.288+33104C>G
chrA1	147010230	C	G	PASS	G	intron_variant	MODIFIER	RASGRF2	101091172	transcript	XM_023257915.1	protein_coding	1	c.288+33104C>G
chrA1	147010230	C	G	PASS	G	intron_variant	MODIFIER	RASGRF2	101091172	transcript	XM_023257899.1	protein_coding	1	c.288+33104C>G
chrA1	147010913	G	A	PASS	A	intron_variant	MODIFIER	RASGRF2	101091172	transcript	XM_023257887.1	protein_coding	1	c.288+33787G>A
chrA1	147010913	G	A	PASS	A	intron_variant	MODIFIER	RASGRF2	101091172	transcript	XM_023257908.1	protein_coding	1	c.288+33787G>A
chrA1	147010913	G	A	PASS	A	intron_variant	MODIFIER	RASGRF2	101091172	transcript	XM_023257891.1	protein_coding	1	c.288+33787G>A
chrA1	147010913	G	A	PASS	A	intron_variant	MODIFIER	RASGRF2	101091172	transcript	XM_023257915.1	protein_coding	1	c.288+33787G>A
chrA1	147010913	G	A	PASS	A	intron_variant	MODIFIER	RASGRF2	101091172	transcript	XM_023257899.1	protein_coding	1	c.288+33787G>A
chrA1	147011021	G	T	PASS	T	intron_variant	MODIFIER	RASGRF2	101091172	transcript	XM_023257887.1	protein_coding	1	c.288+33895G>T
chrA1	147011021	G	T	PASS	T	intron_variant	MODIFIER	RASGRF2	101091172	transcript	XM_023257908.1	protein_coding	1	c.288+33895G>T
chrA1	147011021	G	T	PASS	T	intron_variant	MODIFIER	RASGRF2	101091172	transcript	XM_023257891.1	protein_coding	1	c.288+33895G>T
chrA1	147011021	G	T	PASS	T	intron_variant	MODIFIER	RASGRF2	101091172	transcript	XM_023257915.1	protein_coding	1	c.288+33895G>T
chrA1	147011021	G	T	PASS	T	intron_variant	MODIFIER	RASGRF2	101091172	transcript	XM_023257899.1	protein_coding	1	c.288+33895G>T
chrA1	147011694	G	A	PASS	A	intron_variant	MODIFIER	RASGRF2	101091172	transcript	XM_023257887.1	protein_coding	1	c.288+34568G>A
chrA1	147011694	G	A	PASS	A	intron_variant	MODIFIER	RASGRF2	101091172	transcript	XM_023257908.1	protein_coding	1	c.288+34568G>A
chrA1	147011694	G	A	PASS	A	intron_variant	MODIFIER	RASGRF2	101091172	transcript	XM_023257891.1	protein_coding	1	c.288+34568G>A
chrA1	147011694	G	A	PASS	A	intron_variant	MODIFIER	RASGRF2	101091172	transcript	XM_023257915.1	protein_coding	1	c.288+34568G>A
chrA1	147011694	G	A	PASS	A	intron_variant	MODIFIER	RASGRF2	101091172	transcript	XM_023257899.1	protein_coding	1	c.288+34568G>A
chrA1	147012935	A	C	PASS	C	intron_variant	MODIFIER	RASGRF2	101091172	transcript	XM_023257887.1	protein_coding	1	c.288+35809A>C
chrA1	147012935	A	C	PASS	C	intron_variant	MODIFIER	RASGRF2	101091172	transcript	XM_023257908.1	protein_coding	1	c.288+35809A>C
chrA1	147012935	A	C	PASS	C	intron_variant	MODIFIER	RASGRF2	101091172	transcript	XM_023257891.1	protein_coding	1	c.288+35809A>C
chrA1	147012935	A	C	PASS	C	intron_variant	MODIFIER	RASGRF2	101091172	transcript	XM_023257915.1	protein_coding	1	c.288+35809A>C
chrA1	147012935	A	C	PASS	C	intron_variant	MODIFIER	RASGRF2	101091172	transcript	XM_023257899.1	protein_coding	1	c.288+35809A>C
chrA1	147012958	T	A	PASS	A	intron_variant	MODIFIER	RASGRF2	101091172	transcript	XM_023257887.1	protein_coding	1	c.288+35832T>A
chrA1	147012958	T	A	PASS	A	intron_variant	MODIFIER	RASGRF2	101091172	transcript	XM_023257908.1	protein_coding	1	c.288+35832T>A
chrA1	147012958	T	A	PASS	A	intron_variant	MODIFIER	RASGRF2	101091172	transcript	XM_023257891.1	protein_coding	1	c.288+35832T>A
chrA1	147012958	T	A	PASS	A	intron_variant	MODIFIER	RASGRF2	101091172	transcript	XM_023257915.1	protein_coding	1	c.288+35832T>A
chrA1	147012958	T	A	PASS	A	intron_variant	MODIFIER	RASGRF2	101091172	transcript	XM_023257899.1	protein_coding	1	c.288+35832T>A
chrA1	147014008	T	C	PASS	C	intron_variant	MODIFIER	RASGRF2	101091172	transcript	XM_023257887.1	protein_coding	1	c.288+36882T>C
chrA1	147014008	T	C	PASS	C	intron_variant	MODIFIER	RASGRF2	101091172	transcript	XM_023257908.1	protein_coding	1	c.288+36882T>C
chrA1	147014008	T	C	PASS	C	intron_variant	MODIFIER	RASGRF2	101091172	transcript	XM_023257891.1	protein_coding	1	c.288+36882T>C
chrA1	147014008	T	C	PASS	C	intron_variant	MODIFIER	RASGRF2	101091172	transcript	XM_023257915.1	protein_coding	1	c.288+36882T>C
chrA1	147014008	T	C	PASS	C	intron_variant	MODIFIER	RASGRF2	101091172	transcript	XM_023257899.1	protein_coding	1	c.288+36882T>C
chrA1	147014166	A	T	PASS	T	intron_variant	MODIFIER	RASGRF2	101091172	transcript	XM_023257887.1	protein_coding	1	c.288+37040A>T
chrA1	147014166	A	T	PASS	T	intron_variant	MODIFIER	RASGRF2	101091172	transcript	XM_023257908.1	protein_coding	1	c.288+37040A>T
chrA1	147014166	A	T	PASS	T	intron_variant	MODIFIER	RASGRF2	101091172	transcript	XM_023257891.1	protein_coding	1	c.288+37040A>T
chrA1	147014166	A	T	PASS	T	intron_variant	MODIFIER	RASGRF2	101091172	transcript	XM_023257915.1	protein_coding	1	c.288+37040A>T
chrA1	147014166	A	T	PASS	T	intron_variant	MODIFIER	RASGRF2	101091172	transcript	XM_023257899.1	protein_coding	1	c.288+37040A>T
chrA1	147015085	A	AT	PASS	AT	intron_variant	MODIFIER	RASGRF2	101091172	transcript	XM_023257887.1	protein_coding	1	c.289-36385_289-36384insT
chrA1	147015085	A	AT	PASS	AT	intron_variant	MODIFIER	RASGRF2	101091172	transcript	XM_023257908.1	protein_coding	1	c.289-36385_289-36384insT
chrA1	147015085	A	AT	PASS	AT	intron_variant	MODIFIER	RASGRF2	101091172	transcript	XM_023257891.1	protein_coding	1	c.289-36385_289-36384insT
chrA1	147015085	A	AT	PASS	AT	intron_variant	MODIFIER	RASGRF2	101091172	transcript	XM_023257915.1	protein_coding	1	c.289-36385_289-36384insT
chrA1	147015085	A	AT	PASS	AT	intron_variant	MODIFIER	RASGRF2	101091172	transcript	XM_023257899.1	protein_coding	1	c.289-36385_289-36384insT
chrA1	147016243	G	A	PASS	A	intron_variant	MODIFIER	RASGRF2	101091172	transcript	XM_023257887.1	protein_coding	1	c.289-35227G>A
chrA1	147016243	G	A	PASS	A	intron_variant	MODIFIER	RASGRF2	101091172	transcript	XM_023257908.1	protein_coding	1	c.289-35227G>A
chrA1	147016243	G	A	PASS	A	intron_variant	MODIFIER	RASGRF2	101091172	transcript	XM_023257891.1	protein_coding	1	c.289-35227G>A
chrA1	147016243	G	A	PASS	A	intron_variant	MODIFIER	RASGRF2	101091172	transcript	XM_023257915.1	protein_coding	1	c.289-35227G>A
chrA1	147016243	G	A	PASS	A	intron_variant	MODIFIER	RASGRF2	101091172	transcript	XM_023257899.1	protein_coding	1	c.289-35227G>A
chrA1	147016288	G	A	PASS	A	intron_variant	MODIFIER	RASGRF2	101091172	transcript	XM_023257887.1	protein_coding	1	c.289-35182G>A
chrA1	147016288	G	A	PASS	A	intron_variant	MODIFIER	RASGRF2	101091172	transcript	XM_023257908.1	protein_coding	1	c.289-35182G>A
chrA1	147016288	G	A	PASS	A	intron_variant	MODIFIER	RASGRF2	101091172	transcript	XM_023257891.1	protein_coding	1	c.289-35182G>A
chrA1	147016288	G	A	PASS	A	intron_variant	MODIFIER	RASGRF2	101091172	transcript	XM_023257915.1	protein_coding	1	c.289-35182G>A
chrA1	147016288	G	A	PASS	A	intron_variant	MODIFIER	RASGRF2	101091172	transcript	XM_023257899.1	protein_coding	1	c.289-35182G>A
chrA1	147017891	G	T	PASS	T	intron_variant	MODIFIER	RASGRF2	101091172	transcript	XM_023257887.1	protein_coding	1	c.289-33579G>T
chrA1	147017891	G	T	PASS	T	intron_variant	MODIFIER	RASGRF2	101091172	transcript	XM_023257908.1	protein_coding	1	c.289-33579G>T
chrA1	147017891	G	T	PASS	T	intron_variant	MODIFIER	RASGRF2	101091172	transcript	XM_023257891.1	protein_coding	1	c.289-33579G>T
chrA1	147017891	G	T	PASS	T	intron_variant	MODIFIER	RASGRF2	101091172	transcript	XM_023257915.1	protein_coding	1	c.289-33579G>T
chrA1	147017891	G	T	PASS	T	intron_variant	MODIFIER	RASGRF2	101091172	transcript	XM_023257899.1	protein_coding	1	c.289-33579G>T
chrA1	147017967	A	G	PASS	G	intron_variant	MODIFIER	RASGRF2	101091172	transcript	XM_023257887.1	protein_coding	1	c.289-33503A>G
chrA1	147017967	A	G	PASS	G	intron_variant	MODIFIER	RASGRF2	101091172	transcript	XM_023257908.1	protein_coding	1	c.289-33503A>G
chrA1	147017967	A	G	PASS	G	intron_variant	MODIFIER	RASGRF2	101091172	transcript	XM_023257891.1	protein_coding	1	c.289-33503A>G
chrA1	147017967	A	G	PASS	G	intron_variant	MODIFIER	RASGRF2	101091172	transcript	XM_023257915.1	protein_coding	1	c.289-33503A>G
chrA1	147017967	A	G	PASS	G	intron_variant	MODIFIER	RASGRF2	101091172	transcript	XM_023257899.1	protein_coding	1	c.289-33503A>G
chrA1	147019409	T	C	PASS	C	intron_variant	MODIFIER	RASGRF2	101091172	transcript	XM_023257887.1	protein_coding	1	c.289-32061T>C
chrA1	147019409	T	C	PASS	C	intron_variant	MODIFIER	RASGRF2	101091172	transcript	XM_023257908.1	protein_coding	1	c.289-32061T>C
chrA1	147019409	T	C	PASS	C	intron_variant	MODIFIER	RASGRF2	101091172	transcript	XM_023257891.1	protein_coding	1	c.289-32061T>C
chrA1	147019409	T	C	PASS	C	intron_variant	MODIFIER	RASGRF2	101091172	transcript	XM_023257915.1	protein_coding	1	c.289-32061T>C
chrA1	147019409	T	C	PASS	C	intron_variant	MODIFIER	RASGRF2	101091172	transcript	XM_023257899.1	protein_coding	1	c.289-32061T>C
chrA1	147019555	G	T	PASS	T	intron_variant	MODIFIER	RASGRF2	101091172	transcript	XM_023257887.1	protein_coding	1	c.289-31915G>T
chrA1	147019555	G	T	PASS	T	intron_variant	MODIFIER	RASGRF2	101091172	transcript	XM_023257908.1	protein_coding	1	c.289-31915G>T
chrA1	147019555	G	T	PASS	T	intron_variant	MODIFIER	RASGRF2	101091172	transcript	XM_023257891.1	protein_coding	1	c.289-31915G>T
chrA1	147019555	G	T	PASS	T	intron_variant	MODIFIER	RASGRF2	101091172	transcript	XM_023257915.1	protein_coding	1	c.289-31915G>T
chrA1	147019555	G	T	PASS	T	intron_variant	MODIFIER	RASGRF2	101091172	transcript	XM_023257899.1	protein_coding	1	c.289-31915G>T
chrA1	147019996	A	C	PASS	C	intron_variant	MODIFIER	RASGRF2	101091172	transcript	XM_023257887.1	protein_coding	1	c.289-31474A>C
chrA1	147019996	A	C	PASS	C	intron_variant	MODIFIER	RASGRF2	101091172	transcript	XM_023257908.1	protein_coding	1	c.289-31474A>C
chrA1	147019996	A	C	PASS	C	intron_variant	MODIFIER	RASGRF2	101091172	transcript	XM_023257891.1	protein_coding	1	c.289-31474A>C
chrA1	147019996	A	C	PASS	C	intron_variant	MODIFIER	RASGRF2	101091172	transcript	XM_023257915.1	protein_coding	1	c.289-31474A>C
chrA1	147019996	A	C	PASS	C	intron_variant	MODIFIER	RASGRF2	101091172	transcript	XM_023257899.1	protein_coding	1	c.289-31474A>C
chrA1	147020362	TGAGACAGAGA	T	PASS	T	intron_variant	MODIFIER	RASGRF2	101091172	transcript	XM_023257887.1	protein_coding	1	c.289-31107_289-31098delGAGACAGAGA
chrA1	147020362	TGAGACAGAGA	T	PASS	T	intron_variant	MODIFIER	RASGRF2	101091172	transcript	XM_023257908.1	protein_coding	1	c.289-31107_289-31098delGAGACAGAGA
chrA1	147020362	TGAGACAGAGA	T	PASS	T	intron_variant	MODIFIER	RASGRF2	101091172	transcript	XM_023257891.1	protein_coding	1	c.289-31107_289-31098delGAGACAGAGA
chrA1	147020362	TGAGACAGAGA	T	PASS	T	intron_variant	MODIFIER	RASGRF2	101091172	transcript	XM_023257915.1	protein_coding	1	c.289-31107_289-31098delGAGACAGAGA
chrA1	147020362	TGAGACAGAGA	T	PASS	T	intron_variant	MODIFIER	RASGRF2	101091172	transcript	XM_023257899.1	protein_coding	1	c.289-31107_289-31098delGAGACAGAGA
chrA1	147020664	A	ATCC	PASS	ATCC	intron_variant	MODIFIER	RASGRF2	101091172	transcript	XM_023257887.1	protein_coding	1	c.289-30806_289-30805insTCC
chrA1	147020664	A	ATCC	PASS	ATCC	intron_variant	MODIFIER	RASGRF2	101091172	transcript	XM_023257908.1	protein_coding	1	c.289-30806_289-30805insTCC
chrA1	147020664	A	ATCC	PASS	ATCC	intron_variant	MODIFIER	RASGRF2	101091172	transcript	XM_023257891.1	protein_coding	1	c.289-30806_289-30805insTCC
chrA1	147020664	A	ATCC	PASS	ATCC	intron_variant	MODIFIER	RASGRF2	101091172	transcript	XM_023257915.1	protein_coding	1	c.289-30806_289-30805insTCC
chrA1	147020664	A	ATCC	PASS	ATCC	intron_variant	MODIFIER	RASGRF2	101091172	transcript	XM_023257899.1	protein_coding	1	c.289-30806_289-30805insTCC
chrA1	147020665	A	T	PASS	T	intron_variant	MODIFIER	RASGRF2	101091172	transcript	XM_023257887.1	protein_coding	1	c.289-30805A>T
chrA1	147020665	A	T	PASS	T	intron_variant	MODIFIER	RASGRF2	101091172	transcript	XM_023257908.1	protein_coding	1	c.289-30805A>T
chrA1	147020665	A	T	PASS	T	intron_variant	MODIFIER	RASGRF2	101091172	transcript	XM_023257891.1	protein_coding	1	c.289-30805A>T
chrA1	147020665	A	T	PASS	T	intron_variant	MODIFIER	RASGRF2	101091172	transcript	XM_023257915.1	protein_coding	1	c.289-30805A>T
chrA1	147020665	A	T	PASS	T	intron_variant	MODIFIER	RASGRF2	101091172	transcript	XM_023257899.1	protein_coding	1	c.289-30805A>T
chrA1	147020985	C	T	PASS	T	intron_variant	MODIFIER	RASGRF2	101091172	transcript	XM_023257887.1	protein_coding	1	c.289-30485C>T
chrA1	147020985	C	T	PASS	T	intron_variant	MODIFIER	RASGRF2	101091172	transcript	XM_023257908.1	protein_coding	1	c.289-30485C>T
chrA1	147020985	C	T	PASS	T	intron_variant	MODIFIER	RASGRF2	101091172	transcript	XM_023257891.1	protein_coding	1	c.289-30485C>T
chrA1	147020985	C	T	PASS	T	intron_variant	MODIFIER	RASGRF2	101091172	transcript	XM_023257915.1	protein_coding	1	c.289-30485C>T
chrA1	147020985	C	T	PASS	T	intron_variant	MODIFIER	RASGRF2	101091172	transcript	XM_023257899.1	protein_coding	1	c.289-30485C>T
chrA1	147021983	G	A	PASS	A	intron_variant	MODIFIER	RASGRF2	101091172	transcript	XM_023257887.1	protein_coding	1	c.289-29487G>A
chrA1	147021983	G	A	PASS	A	intron_variant	MODIFIER	RASGRF2	101091172	transcript	XM_023257908.1	protein_coding	1	c.289-29487G>A
chrA1	147021983	G	A	PASS	A	intron_variant	MODIFIER	RASGRF2	101091172	transcript	XM_023257891.1	protein_coding	1	c.289-29487G>A
chrA1	147021983	G	A	PASS	A	intron_variant	MODIFIER	RASGRF2	101091172	transcript	XM_023257915.1	protein_coding	1	c.289-29487G>A
chrA1	147021983	G	A	PASS	A	intron_variant	MODIFIER	RASGRF2	101091172	transcript	XM_023257899.1	protein_coding	1	c.289-29487G>A
chrA1	147022132	C	G	PASS	G	intron_variant	MODIFIER	RASGRF2	101091172	transcript	XM_023257887.1	protein_coding	1	c.289-29338C>G
chrA1	147022132	C	G	PASS	G	intron_variant	MODIFIER	RASGRF2	101091172	transcript	XM_023257908.1	protein_coding	1	c.289-29338C>G
chrA1	147022132	C	G	PASS	G	intron_variant	MODIFIER	RASGRF2	101091172	transcript	XM_023257891.1	protein_coding	1	c.289-29338C>G
chrA1	147022132	C	G	PASS	G	intron_variant	MODIFIER	RASGRF2	101091172	transcript	XM_023257915.1	protein_coding	1	c.289-29338C>G
chrA1	147022132	C	G	PASS	G	intron_variant	MODIFIER	RASGRF2	101091172	transcript	XM_023257899.1	protein_coding	1	c.289-29338C>G
chrA1	147022619	A	G	PASS	G	intron_variant	MODIFIER	RASGRF2	101091172	transcript	XM_023257887.1	protein_coding	1	c.289-28851A>G
chrA1	147022619	A	G	PASS	G	intron_variant	MODIFIER	RASGRF2	101091172	transcript	XM_023257908.1	protein_coding	1	c.289-28851A>G
chrA1	147022619	A	G	PASS	G	intron_variant	MODIFIER	RASGRF2	101091172	transcript	XM_023257891.1	protein_coding	1	c.289-28851A>G
chrA1	147022619	A	G	PASS	G	intron_variant	MODIFIER	RASGRF2	101091172	transcript	XM_023257915.1	protein_coding	1	c.289-28851A>G
chrA1	147022619	A	G	PASS	G	intron_variant	MODIFIER	RASGRF2	101091172	transcript	XM_023257899.1	protein_coding	1	c.289-28851A>G
chrA1	147022861	TTTCTTTGCTAGTGGG	T	PASS	T	intron_variant	MODIFIER	RASGRF2	101091172	transcript	XM_023257887.1	protein_coding	1	c.289-28608_289-28594delTTCTTTGCTAGTGGG
chrA1	147022861	TTTCTTTGCTAGTGGG	T	PASS	T	intron_variant	MODIFIER	RASGRF2	101091172	transcript	XM_023257908.1	protein_coding	1	c.289-28608_289-28594delTTCTTTGCTAGTGGG
chrA1	147022861	TTTCTTTGCTAGTGGG	T	PASS	T	intron_variant	MODIFIER	RASGRF2	101091172	transcript	XM_023257891.1	protein_coding	1	c.289-28608_289-28594delTTCTTTGCTAGTGGG
chrA1	147022861	TTTCTTTGCTAGTGGG	T	PASS	T	intron_variant	MODIFIER	RASGRF2	101091172	transcript	XM_023257915.1	protein_coding	1	c.289-28608_289-28594delTTCTTTGCTAGTGGG
chrA1	147022861	TTTCTTTGCTAGTGGG	T	PASS	T	intron_variant	MODIFIER	RASGRF2	101091172	transcript	XM_023257899.1	protein_coding	1	c.289-28608_289-28594delTTCTTTGCTAGTGGG
chrA1	147023452	A	G	PASS	G	intron_variant	MODIFIER	RASGRF2	101091172	transcript	XM_023257887.1	protein_coding	1	c.289-28018A>G
chrA1	147023452	A	G	PASS	G	intron_variant	MODIFIER	RASGRF2	101091172	transcript	XM_023257908.1	protein_coding	1	c.289-28018A>G
chrA1	147023452	A	G	PASS	G	intron_variant	MODIFIER	RASGRF2	101091172	transcript	XM_023257891.1	protein_coding	1	c.289-28018A>G
chrA1	147023452	A	G	PASS	G	intron_variant	MODIFIER	RASGRF2	101091172	transcript	XM_023257915.1	protein_coding	1	c.289-28018A>G
chrA1	147023452	A	G	PASS	G	intron_variant	MODIFIER	RASGRF2	101091172	transcript	XM_023257899.1	protein_coding	1	c.289-28018A>G
chrA1	147023878	C	A	PASS	A	intron_variant	MODIFIER	RASGRF2	101091172	transcript	XM_023257887.1	protein_coding	1	c.289-27592C>A
chrA1	147023878	C	A	PASS	A	intron_variant	MODIFIER	RASGRF2	101091172	transcript	XM_023257908.1	protein_coding	1	c.289-27592C>A
chrA1	147023878	C	A	PASS	A	intron_variant	MODIFIER	RASGRF2	101091172	transcript	XM_023257891.1	protein_coding	1	c.289-27592C>A
chrA1	147023878	C	A	PASS	A	intron_variant	MODIFIER	RASGRF2	101091172	transcript	XM_023257915.1	protein_coding	1	c.289-27592C>A
chrA1	147023878	C	A	PASS	A	intron_variant	MODIFIER	RASGRF2	101091172	transcript	XM_023257899.1	protein_coding	1	c.289-27592C>A
chrA1	147044146	T	A	PASS	A	intron_variant	MODIFIER	RASGRF2	101091172	transcript	XM_023257887.1	protein_coding	1	c.289-7324T>A
chrA1	147044146	T	A	PASS	A	intron_variant	MODIFIER	RASGRF2	101091172	transcript	XM_023257908.1	protein_coding	1	c.289-7324T>A
chrA1	147044146	T	A	PASS	A	intron_variant	MODIFIER	RASGRF2	101091172	transcript	XM_023257891.1	protein_coding	1	c.289-7324T>A
chrA1	147044146	T	A	PASS	A	intron_variant	MODIFIER	RASGRF2	101091172	transcript	XM_023257915.1	protein_coding	1	c.289-7324T>A
chrA1	147044146	T	A	PASS	A	intron_variant	MODIFIER	RASGRF2	101091172	transcript	XM_023257899.1	protein_coding	1	c.289-7324T>A
chrA1	147049583	A	G	PASS	G	intron_variant	MODIFIER	RASGRF2	101091172	transcript	XM_023257887.1	protein_coding	1	c.289-1887A>G
chrA1	147049583	A	G	PASS	G	intron_variant	MODIFIER	RASGRF2	101091172	transcript	XM_023257908.1	protein_coding	1	c.289-1887A>G
chrA1	147049583	A	G	PASS	G	intron_variant	MODIFIER	RASGRF2	101091172	transcript	XM_023257891.1	protein_coding	1	c.289-1887A>G
chrA1	147049583	A	G	PASS	G	intron_variant	MODIFIER	RASGRF2	101091172	transcript	XM_023257915.1	protein_coding	1	c.289-1887A>G
chrA1	147049583	A	G	PASS	G	intron_variant	MODIFIER	RASGRF2	101091172	transcript	XM_023257899.1	protein_coding	1	c.289-1887A>G
chrA1	147052734	T	C	PASS	C	intron_variant	MODIFIER	RASGRF2	101091172	transcript	XM_023257887.1	protein_coding	2	c.395+1158T>C
chrA1	147052734	T	C	PASS	C	intron_variant	MODIFIER	RASGRF2	101091172	transcript	XM_023257908.1	protein_coding	2	c.395+1158T>C
chrA1	147052734	T	C	PASS	C	intron_variant	MODIFIER	RASGRF2	101091172	transcript	XM_023257891.1	protein_coding	2	c.395+1158T>C
chrA1	147052734	T	C	PASS	C	intron_variant	MODIFIER	RASGRF2	101091172	transcript	XM_023257915.1	protein_coding	2	c.395+1158T>C
chrA1	147052734	T	C	PASS	C	intron_variant	MODIFIER	RASGRF2	101091172	transcript	XM_023257899.1	protein_coding	2	c.395+1158T>C
chrA1	147173875	ACTCT	A	PASS	A	intron_variant	MODIFIER	RASGRF2	101091172	transcript	XM_023257887.1	protein_coding	19	c.2844+2215_2844+2218delCTCT
chrA1	147173875	ACTCT	A	PASS	A	intron_variant	MODIFIER	RASGRF2	101091172	transcript	XM_023257908.1	protein_coding	19	c.2718+2215_2718+2218delCTCT
chrA1	147173875	ACTCT	A	PASS	A	intron_variant	MODIFIER	RASGRF2	101091172	transcript	XM_023257891.1	protein_coding	19	c.2838+2215_2838+2218delCTCT
chrA1	147173875	ACTCT	A	PASS	A	intron_variant	MODIFIER	RASGRF2	101091172	transcript	XM_023257915.1	protein_coding	18	c.2673+2215_2673+2218delCTCT
chrA1	147173875	ACTCT	A	PASS	A	intron_variant	MODIFIER	RASGRF2	101091172	transcript	XM_023257899.1	protein_coding	18	c.2799+2215_2799+2218delCTCT
chrA1	147242354	T	TTTG	PASS	TTTG	downstream_gene_variant	MODIFIER	LOC102900440	102900440	transcript	XR_439534.2	pseudogene	-1	n.*1415_*1416insCAA
chrA1	147242354	T	TTTG	PASS	TTTG	downstream_gene_variant	MODIFIER	LOC102900440	102900440	transcript	XR_002744259.1	pseudogene	-1	n.*1415_*1416insCAA
chrA1	147242354	T	TTTG	PASS	TTTG	intron_variant	MODIFIER	CKMT2	101088213	transcript	XM_003981112.3	protein_coding	4	c.447+121_447+122insTTG
chrA1	147328968	T	C	PASS	C	intron_variant	MODIFIER	ACOT12	101091423	transcript	XM_023257923.1	protein_coding	4	c.360+1218A>G
chrA1	147328968	T	C	PASS	C	intron_variant	MODIFIER	ACOT12	101091423	transcript	XM_023257929.1	protein_coding	4	c.360+1218A>G
chrA1	147328968	T	C	PASS	C	intron_variant	MODIFIER	ACOT12	101091423	transcript	XM_023257940.1	protein_coding	4	c.108+1218A>G
chrA1	147328968	T	C	PASS	C	intron_variant	MODIFIER	ACOT12	101091423	transcript	XM_023257927.1	protein_coding	4	c.360+1218A>G
chrA1	147328968	T	C	PASS	C	intron_variant	MODIFIER	ACOT12	101091423	transcript	XM_023257934.1	protein_coding	4	c.360+1218A>G
chrA1	147333442	T	C	PASS	C	intron_variant	MODIFIER	ACOT12	101091423	transcript	XM_023257923.1	protein_coding	3	c.258+377A>G
chrA1	147333442	T	C	PASS	C	intron_variant	MODIFIER	ACOT12	101091423	transcript	XM_023257929.1	protein_coding	3	c.258+377A>G
chrA1	147333442	T	C	PASS	C	intron_variant	MODIFIER	ACOT12	101091423	transcript	XM_023257940.1	protein_coding	3	c.6+377A>G
chrA1	147333442	T	C	PASS	C	intron_variant	MODIFIER	ACOT12	101091423	transcript	XM_023257927.1	protein_coding	3	c.258+377A>G
chrA1	147333442	T	C	PASS	C	intron_variant	MODIFIER	ACOT12	101091423	transcript	XM_023257934.1	protein_coding	3	c.258+377A>G
chrA1	147338580	G	A	PASS	A	intron_variant	MODIFIER	ACOT12	101091423	transcript	XM_023257923.1	protein_coding	2	c.198-4701C>T
chrA1	147338580	G	A	PASS	A	intron_variant	MODIFIER	ACOT12	101091423	transcript	XM_023257929.1	protein_coding	2	c.198-4701C>T
chrA1	147338580	G	A	PASS	A	intron_variant	MODIFIER	ACOT12	101091423	transcript	XM_023257940.1	protein_coding	2	c.-55-4701C>T
chrA1	147338580	G	A	PASS	A	intron_variant	MODIFIER	ACOT12	101091423	transcript	XM_023257927.1	protein_coding	2	c.198-4701C>T
chrA1	147338580	G	A	PASS	A	intron_variant	MODIFIER	ACOT12	101091423	transcript	XM_023257934.1	protein_coding	2	c.198-4701C>T
chrA1	147340257	A	G	PASS	G	intron_variant	MODIFIER	ACOT12	101091423	transcript	XM_023257923.1	protein_coding	2	c.197+3495T>C
chrA1	147340257	A	G	PASS	G	intron_variant	MODIFIER	ACOT12	101091423	transcript	XM_023257929.1	protein_coding	2	c.197+3495T>C
chrA1	147340257	A	G	PASS	G	intron_variant	MODIFIER	ACOT12	101091423	transcript	XM_023257940.1	protein_coding	2	c.-56+3495T>C
chrA1	147340257	A	G	PASS	G	intron_variant	MODIFIER	ACOT12	101091423	transcript	XM_023257927.1	protein_coding	2	c.197+3495T>C
chrA1	147340257	A	G	PASS	G	intron_variant	MODIFIER	ACOT12	101091423	transcript	XM_023257934.1	protein_coding	2	c.197+3495T>C
chrA1	147346100	G	A	PASS	A	intron_variant	MODIFIER	ACOT12	101091423	transcript	XM_023257923.1	protein_coding	1	c.128-2279C>T
chrA1	147346100	G	A	PASS	A	intron_variant	MODIFIER	ACOT12	101091423	transcript	XM_023257929.1	protein_coding	1	c.128-2279C>T
chrA1	147346100	G	A	PASS	A	intron_variant	MODIFIER	ACOT12	101091423	transcript	XM_023257940.1	protein_coding	1	c.-125-2279C>T
chrA1	147346100	G	A	PASS	A	intron_variant	MODIFIER	ACOT12	101091423	transcript	XM_023257927.1	protein_coding	1	c.128-2279C>T
chrA1	147346100	G	A	PASS	A	intron_variant	MODIFIER	ACOT12	101091423	transcript	XM_023257934.1	protein_coding	1	c.128-2279C>T
chrA1	147346367	G	T	PASS	T	intron_variant	MODIFIER	ACOT12	101091423	transcript	XM_023257923.1	protein_coding	1	c.128-2546C>A
chrA1	147346367	G	T	PASS	T	intron_variant	MODIFIER	ACOT12	101091423	transcript	XM_023257929.1	protein_coding	1	c.128-2546C>A
chrA1	147346367	G	T	PASS	T	intron_variant	MODIFIER	ACOT12	101091423	transcript	XM_023257940.1	protein_coding	1	c.-125-2546C>A
chrA1	147346367	G	T	PASS	T	intron_variant	MODIFIER	ACOT12	101091423	transcript	XM_023257927.1	protein_coding	1	c.128-2546C>A
chrA1	147346367	G	T	PASS	T	intron_variant	MODIFIER	ACOT12	101091423	transcript	XM_023257934.1	protein_coding	1	c.128-2546C>A
chrA1	147350606	C	G	PASS	G	upstream_gene_variant	MODIFIER	ACOT12	101091423	transcript	XM_023257940.1	protein_coding	-1	c.-16782G>C
chrA1	147350606	C	G	PASS	G	intron_variant	MODIFIER	ACOT12	101091423	transcript	XM_023257923.1	protein_coding	1	c.127+102G>C
chrA1	147350606	C	G	PASS	G	intron_variant	MODIFIER	ACOT12	101091423	transcript	XM_023257929.1	protein_coding	1	c.127+102G>C
chrA1	147350606	C	G	PASS	G	intron_variant	MODIFIER	ACOT12	101091423	transcript	XM_023257927.1	protein_coding	1	c.127+102G>C
chrA1	147350606	C	G	PASS	G	intron_variant	MODIFIER	ACOT12	101091423	transcript	XM_023257934.1	protein_coding	1	c.127+102G>C
chrA1	147353989	A	G	PASS	G	upstream_gene_variant	MODIFIER	ACOT12	101091423	transcript	XM_023257923.1	protein_coding	-1	c.-3155T>C
chrA1	147353989	A	G	PASS	G	upstream_gene_variant	MODIFIER	ACOT12	101091423	transcript	XM_023257929.1	protein_coding	-1	c.-3155T>C
chrA1	147353989	A	G	PASS	G	upstream_gene_variant	MODIFIER	ACOT12	101091423	transcript	XM_023257940.1	protein_coding	-1	c.-20165T>C
chrA1	147353989	A	G	PASS	G	upstream_gene_variant	MODIFIER	ACOT12	101091423	transcript	XM_023257927.1	protein_coding	-1	c.-3155T>C
chrA1	147353989	A	G	PASS	G	upstream_gene_variant	MODIFIER	ACOT12	101091423	transcript	XM_023257934.1	protein_coding	-1	c.-3155T>C
chrA1	147353989	A	G	PASS	G	intergenic_region	MODIFIER	ACOT12-SSBP2	101091423-101088719	intergenic_region	101091423-101088719		-1	n.147353989A>G
chrA1	147355965	A	G	PASS	G	upstream_gene_variant	MODIFIER	ACOT12	101091423	transcript	XM_023257923.1	protein_coding	-1	c.-5131T>C
chrA1	147355965	A	G	PASS	G	upstream_gene_variant	MODIFIER	ACOT12	101091423	transcript	XM_023257929.1	protein_coding	-1	c.-5131T>C
chrA1	147355965	A	G	PASS	G	upstream_gene_variant	MODIFIER	ACOT12	101091423	transcript	XM_023257927.1	protein_coding	-1	c.-5131T>C
chrA1	147355965	A	G	PASS	G	upstream_gene_variant	MODIFIER	ACOT12	101091423	transcript	XM_023257934.1	protein_coding	-1	c.-5131T>C
chrA1	147355965	A	G	PASS	G	intergenic_region	MODIFIER	ACOT12-SSBP2	101091423-101088719	intergenic_region	101091423-101088719		-1	n.147355965A>G
chrA1	147361411	C	G	PASS	G	intergenic_region	MODIFIER	ACOT12-SSBP2	101091423-101088719	intergenic_region	101091423-101088719		-1	n.147361411C>G
chrA1	147362656	T	C	PASS	C	intergenic_region	MODIFIER	ACOT12-SSBP2	101091423-101088719	intergenic_region	101091423-101088719		-1	n.147362656T>C
chrA1	147362658	A	T	PASS	T	intergenic_region	MODIFIER	ACOT12-SSBP2	101091423-101088719	intergenic_region	101091423-101088719		-1	n.147362658A>T
chrA1	147367611	C	T	PASS	T	intergenic_region	MODIFIER	ACOT12-SSBP2	101091423-101088719	intergenic_region	101091423-101088719		-1	n.147367611C>T
chrA1	147370350	T	C	PASS	C	intergenic_region	MODIFIER	ACOT12-SSBP2	101091423-101088719	intergenic_region	101091423-101088719		-1	n.147370350T>C
chrA1	147372537	A	T	PASS	T	intergenic_region	MODIFIER	ACOT12-SSBP2	101091423-101088719	intergenic_region	101091423-101088719		-1	n.147372537A>T
chrA1	147372754	C	T	PASS	T	intergenic_region	MODIFIER	ACOT12-SSBP2	101091423-101088719	intergenic_region	101091423-101088719		-1	n.147372754C>T
chrA1	147373852	CAGACACGT	C	PASS	C	intergenic_region	MODIFIER	ACOT12-SSBP2	101091423-101088719	intergenic_region	101091423-101088719		-1	n.147373853_147373860delAGACACGT
chrA1	147374273	C	T	PASS	T	downstream_gene_variant	MODIFIER	SSBP2	101088719	transcript	XM_011284322.2	protein_coding	-1	c.*5228G>A
chrA1	147374273	C	T	PASS	T	intergenic_region	MODIFIER	ACOT12-SSBP2	101091423-101088719	intergenic_region	101091423-101088719		-1	n.147374273C>T
chrA1	147374704	A	G	PASS	G	downstream_gene_variant	MODIFIER	SSBP2	101088719	transcript	XM_011284322.2	protein_coding	-1	c.*4797T>C
chrA1	147374704	A	G	PASS	G	downstream_gene_variant	MODIFIER	SSBP2	101088719	transcript	XM_011284323.3	protein_coding	-1	c.*4797T>C
chrA1	147374704	A	G	PASS	G	downstream_gene_variant	MODIFIER	SSBP2	101088719	transcript	XM_011284330.2	protein_coding	-1	c.*4797T>C
chrA1	147374704	A	G	PASS	G	downstream_gene_variant	MODIFIER	SSBP2	101088719	transcript	XM_011284326.3	protein_coding	-1	c.*4797T>C
chrA1	147374704	A	G	PASS	G	downstream_gene_variant	MODIFIER	SSBP2	101088719	transcript	XM_019836180.1	protein_coding	-1	c.*4797T>C
chrA1	147374704	A	G	PASS	G	intergenic_region	MODIFIER	ACOT12-SSBP2	101091423-101088719	intergenic_region	101091423-101088719		-1	n.147374704A>G
chrA1	147376820	A	G	PASS	G	downstream_gene_variant	MODIFIER	SSBP2	101088719	transcript	XM_011284322.2	protein_coding	-1	c.*2681T>C
chrA1	147376820	A	G	PASS	G	downstream_gene_variant	MODIFIER	SSBP2	101088719	transcript	XM_011284323.3	protein_coding	-1	c.*2681T>C
chrA1	147376820	A	G	PASS	G	downstream_gene_variant	MODIFIER	SSBP2	101088719	transcript	XM_011284330.2	protein_coding	-1	c.*2681T>C
chrA1	147376820	A	G	PASS	G	downstream_gene_variant	MODIFIER	SSBP2	101088719	transcript	XM_011284326.3	protein_coding	-1	c.*2681T>C
chrA1	147376820	A	G	PASS	G	downstream_gene_variant	MODIFIER	SSBP2	101088719	transcript	XM_019836180.1	protein_coding	-1	c.*2681T>C
chrA1	147376820	A	G	PASS	G	intergenic_region	MODIFIER	ACOT12-SSBP2	101091423-101088719	intergenic_region	101091423-101088719		-1	n.147376820A>G
chrA1	147377587	T	G	PASS	G	downstream_gene_variant	MODIFIER	SSBP2	101088719	transcript	XM_011284322.2	protein_coding	-1	c.*1914A>C
chrA1	147377587	T	G	PASS	G	downstream_gene_variant	MODIFIER	SSBP2	101088719	transcript	XM_011284323.3	protein_coding	-1	c.*1914A>C
chrA1	147377587	T	G	PASS	G	downstream_gene_variant	MODIFIER	SSBP2	101088719	transcript	XM_011284330.2	protein_coding	-1	c.*1914A>C
chrA1	147377587	T	G	PASS	G	downstream_gene_variant	MODIFIER	SSBP2	101088719	transcript	XM_011284326.3	protein_coding	-1	c.*1914A>C
chrA1	147377587	T	G	PASS	G	downstream_gene_variant	MODIFIER	SSBP2	101088719	transcript	XM_019836180.1	protein_coding	-1	c.*1914A>C
chrA1	147377587	T	G	PASS	G	intergenic_region	MODIFIER	ACOT12-SSBP2	101091423-101088719	intergenic_region	101091423-101088719		-1	n.147377587T>G
chrA1	147377836	C	T	PASS	T	downstream_gene_variant	MODIFIER	SSBP2	101088719	transcript	XM_011284322.2	protein_coding	-1	c.*1665G>A
chrA1	147377836	C	T	PASS	T	downstream_gene_variant	MODIFIER	SSBP2	101088719	transcript	XM_011284323.3	protein_coding	-1	c.*1665G>A
chrA1	147377836	C	T	PASS	T	downstream_gene_variant	MODIFIER	SSBP2	101088719	transcript	XM_011284330.2	protein_coding	-1	c.*1665G>A
chrA1	147377836	C	T	PASS	T	downstream_gene_variant	MODIFIER	SSBP2	101088719	transcript	XM_011284326.3	protein_coding	-1	c.*1665G>A
chrA1	147377836	C	T	PASS	T	downstream_gene_variant	MODIFIER	SSBP2	101088719	transcript	XM_019836180.1	protein_coding	-1	c.*1665G>A
chrA1	147377836	C	T	PASS	T	intergenic_region	MODIFIER	ACOT12-SSBP2	101091423-101088719	intergenic_region	101091423-101088719		-1	n.147377836C>T
chrA1	147378865	CTTCTTT	C	PASS	C	downstream_gene_variant	MODIFIER	SSBP2	101088719	transcript	XM_011284322.2	protein_coding	-1	c.*630_*635delAAAGAA
chrA1	147378865	CTTCTTT	C	PASS	C	downstream_gene_variant	MODIFIER	SSBP2	101088719	transcript	XM_011284323.3	protein_coding	-1	c.*630_*635delAAAGAA
chrA1	147378865	CTTCTTT	C	PASS	C	downstream_gene_variant	MODIFIER	SSBP2	101088719	transcript	XM_011284330.2	protein_coding	-1	c.*630_*635delAAAGAA
chrA1	147378865	CTTCTTT	C	PASS	C	downstream_gene_variant	MODIFIER	SSBP2	101088719	transcript	XM_011284326.3	protein_coding	-1	c.*630_*635delAAAGAA
chrA1	147378865	CTTCTTT	C	PASS	C	downstream_gene_variant	MODIFIER	SSBP2	101088719	transcript	XM_019836180.1	protein_coding	-1	c.*630_*635delAAAGAA
chrA1	147378865	CTTCTTT	C	PASS	C	intergenic_region	MODIFIER	ACOT12-SSBP2	101091423-101088719	intergenic_region	101091423-101088719		-1	n.147378866_147378871delTTCTTT
chrA1	147379194	T	A	PASS	A	3_prime_UTR_variant	MODIFIER	SSBP2	101088719	transcript	XM_011284322.2	protein_coding	17	c.*307A>T
chrA1	147379194	T	A	PASS	A	downstream_gene_variant	MODIFIER	SSBP2	101088719	transcript	XM_011284323.3	protein_coding	-1	c.*307A>T
chrA1	147379194	T	A	PASS	A	downstream_gene_variant	MODIFIER	SSBP2	101088719	transcript	XM_011284330.2	protein_coding	-1	c.*307A>T
chrA1	147379194	T	A	PASS	A	downstream_gene_variant	MODIFIER	SSBP2	101088719	transcript	XM_011284326.3	protein_coding	-1	c.*307A>T
chrA1	147379194	T	A	PASS	A	downstream_gene_variant	MODIFIER	SSBP2	101088719	transcript	XM_019836180.1	protein_coding	-1	c.*307A>T
chrA1	147379594	TG	T	PASS	T	intron_variant	MODIFIER	SSBP2	101088719	transcript	XM_011284322.2	protein_coding	16	c.1081-65delC
chrA1	147379594	TG	T	PASS	T	intron_variant	MODIFIER	SSBP2	101088719	transcript	XM_011284323.3	protein_coding	16	c.1057-65delC
chrA1	147379594	TG	T	PASS	T	intron_variant	MODIFIER	SSBP2	101088719	transcript	XM_011284330.2	protein_coding	15	c.967-65delC
chrA1	147379594	TG	T	PASS	T	intron_variant	MODIFIER	SSBP2	101088719	transcript	XM_011284326.3	protein_coding	15	c.991-65delC
chrA1	147379594	TG	T	PASS	T	intron_variant	MODIFIER	SSBP2	101088719	transcript	XM_019836180.1	protein_coding	16	c.1060-65delC
chrA1	147379630	A	G	PASS	G	intron_variant	MODIFIER	SSBP2	101088719	transcript	XM_011284322.2	protein_coding	16	c.1081-100T>C
chrA1	147379630	A	G	PASS	G	intron_variant	MODIFIER	SSBP2	101088719	transcript	XM_011284323.3	protein_coding	16	c.1057-100T>C
chrA1	147379630	A	G	PASS	G	intron_variant	MODIFIER	SSBP2	101088719	transcript	XM_011284330.2	protein_coding	15	c.967-100T>C
chrA1	147379630	A	G	PASS	G	intron_variant	MODIFIER	SSBP2	101088719	transcript	XM_011284326.3	protein_coding	15	c.991-100T>C
chrA1	147379630	A	G	PASS	G	intron_variant	MODIFIER	SSBP2	101088719	transcript	XM_019836180.1	protein_coding	16	c.1060-100T>C
chrA1	147379642	C	T	PASS	T	intron_variant	MODIFIER	SSBP2	101088719	transcript	XM_011284322.2	protein_coding	16	c.1081-112G>A
chrA1	147379642	C	T	PASS	T	intron_variant	MODIFIER	SSBP2	101088719	transcript	XM_011284323.3	protein_coding	16	c.1057-112G>A
chrA1	147379642	C	T	PASS	T	intron_variant	MODIFIER	SSBP2	101088719	transcript	XM_011284330.2	protein_coding	15	c.967-112G>A
chrA1	147379642	C	T	PASS	T	intron_variant	MODIFIER	SSBP2	101088719	transcript	XM_011284326.3	protein_coding	15	c.991-112G>A
chrA1	147379642	C	T	PASS	T	intron_variant	MODIFIER	SSBP2	101088719	transcript	XM_019836180.1	protein_coding	16	c.1060-112G>A
chrA1	147379909	G	GAGTAACTATATT	PASS	GAGTAACTATATT	intron_variant	MODIFIER	SSBP2	101088719	transcript	XM_011284322.2	protein_coding	16	c.1081-380_1081-379insAATATAGTTACT
chrA1	147379909	G	GAGTAACTATATT	PASS	GAGTAACTATATT	intron_variant	MODIFIER	SSBP2	101088719	transcript	XM_011284323.3	protein_coding	16	c.1057-380_1057-379insAATATAGTTACT
chrA1	147379909	G	GAGTAACTATATT	PASS	GAGTAACTATATT	intron_variant	MODIFIER	SSBP2	101088719	transcript	XM_011284330.2	protein_coding	15	c.967-380_967-379insAATATAGTTACT
chrA1	147379909	G	GAGTAACTATATT	PASS	GAGTAACTATATT	intron_variant	MODIFIER	SSBP2	101088719	transcript	XM_011284326.3	protein_coding	15	c.991-380_991-379insAATATAGTTACT
chrA1	147379909	G	GAGTAACTATATT	PASS	GAGTAACTATATT	intron_variant	MODIFIER	SSBP2	101088719	transcript	XM_019836180.1	protein_coding	16	c.1060-380_1060-379insAATATAGTTACT
chrA1	147380074	A	G	PASS	G	intron_variant	MODIFIER	SSBP2	101088719	transcript	XM_011284322.2	protein_coding	16	c.1081-544T>C
chrA1	147380074	A	G	PASS	G	intron_variant	MODIFIER	SSBP2	101088719	transcript	XM_011284323.3	protein_coding	16	c.1057-544T>C
chrA1	147380074	A	G	PASS	G	intron_variant	MODIFIER	SSBP2	101088719	transcript	XM_011284330.2	protein_coding	15	c.967-544T>C
chrA1	147380074	A	G	PASS	G	intron_variant	MODIFIER	SSBP2	101088719	transcript	XM_011284326.3	protein_coding	15	c.991-544T>C
chrA1	147380074	A	G	PASS	G	intron_variant	MODIFIER	SSBP2	101088719	transcript	XM_019836180.1	protein_coding	16	c.1060-544T>C
chrA1	147381798	G	A	PASS	A	intron_variant	MODIFIER	SSBP2	101088719	transcript	XM_011284322.2	protein_coding	16	c.1081-2268C>T
chrA1	147381798	G	A	PASS	A	intron_variant	MODIFIER	SSBP2	101088719	transcript	XM_011284323.3	protein_coding	16	c.1057-2268C>T
chrA1	147381798	G	A	PASS	A	intron_variant	MODIFIER	SSBP2	101088719	transcript	XM_011284330.2	protein_coding	15	c.967-2268C>T
chrA1	147381798	G	A	PASS	A	intron_variant	MODIFIER	SSBP2	101088719	transcript	XM_011284326.3	protein_coding	15	c.991-2268C>T
chrA1	147381798	G	A	PASS	A	intron_variant	MODIFIER	SSBP2	101088719	transcript	XM_019836180.1	protein_coding	16	c.1060-2268C>T
chrA1	147382758	A	G	PASS	G	intron_variant	MODIFIER	SSBP2	101088719	transcript	XM_011284322.2	protein_coding	16	c.1081-3228T>C
chrA1	147382758	A	G	PASS	G	intron_variant	MODIFIER	SSBP2	101088719	transcript	XM_011284323.3	protein_coding	16	c.1057-3228T>C
chrA1	147382758	A	G	PASS	G	intron_variant	MODIFIER	SSBP2	101088719	transcript	XM_011284330.2	protein_coding	15	c.967-3228T>C
chrA1	147382758	A	G	PASS	G	intron_variant	MODIFIER	SSBP2	101088719	transcript	XM_011284326.3	protein_coding	15	c.991-3228T>C
chrA1	147382758	A	G	PASS	G	intron_variant	MODIFIER	SSBP2	101088719	transcript	XM_019836180.1	protein_coding	16	c.1060-3228T>C
chrA1	147384543	G	A	PASS	A	intron_variant	MODIFIER	SSBP2	101088719	transcript	XM_011284322.2	protein_coding	16	c.1080+1755C>T
chrA1	147384543	G	A	PASS	A	intron_variant	MODIFIER	SSBP2	101088719	transcript	XM_011284323.3	protein_coding	16	c.1056+1755C>T
chrA1	147384543	G	A	PASS	A	intron_variant	MODIFIER	SSBP2	101088719	transcript	XM_011284330.2	protein_coding	15	c.966+1755C>T
chrA1	147384543	G	A	PASS	A	intron_variant	MODIFIER	SSBP2	101088719	transcript	XM_011284326.3	protein_coding	15	c.990+1755C>T
chrA1	147384543	G	A	PASS	A	intron_variant	MODIFIER	SSBP2	101088719	transcript	XM_019836180.1	protein_coding	16	c.1059+1755C>T
chrA1	147385340	C	T	PASS	T	intron_variant	MODIFIER	SSBP2	101088719	transcript	XM_011284322.2	protein_coding	16	c.1080+958G>A
chrA1	147385340	C	T	PASS	T	intron_variant	MODIFIER	SSBP2	101088719	transcript	XM_011284323.3	protein_coding	16	c.1056+958G>A
chrA1	147385340	C	T	PASS	T	intron_variant	MODIFIER	SSBP2	101088719	transcript	XM_011284330.2	protein_coding	15	c.966+958G>A
chrA1	147385340	C	T	PASS	T	intron_variant	MODIFIER	SSBP2	101088719	transcript	XM_011284326.3	protein_coding	15	c.990+958G>A
chrA1	147385340	C	T	PASS	T	intron_variant	MODIFIER	SSBP2	101088719	transcript	XM_019836180.1	protein_coding	16	c.1059+958G>A
chrA1	147388194	C	T	PASS	T	intron_variant	MODIFIER	SSBP2	101088719	transcript	XM_011284322.2	protein_coding	15	c.982-1798G>A
chrA1	147388194	C	T	PASS	T	intron_variant	MODIFIER	SSBP2	101088719	transcript	XM_011284323.3	protein_coding	15	c.958-1798G>A
chrA1	147388194	C	T	PASS	T	intron_variant	MODIFIER	SSBP2	101088719	transcript	XM_011284330.2	protein_coding	14	c.868-1798G>A
chrA1	147388194	C	T	PASS	T	intron_variant	MODIFIER	SSBP2	101088719	transcript	XM_011284326.3	protein_coding	14	c.892-1798G>A
chrA1	147388194	C	T	PASS	T	intron_variant	MODIFIER	SSBP2	101088719	transcript	XM_019836180.1	protein_coding	15	c.961-1798G>A
chrA1	147388195	T	G	PASS	G	intron_variant	MODIFIER	SSBP2	101088719	transcript	XM_011284322.2	protein_coding	15	c.982-1799A>C
chrA1	147388195	T	G	PASS	G	intron_variant	MODIFIER	SSBP2	101088719	transcript	XM_011284323.3	protein_coding	15	c.958-1799A>C
chrA1	147388195	T	G	PASS	G	intron_variant	MODIFIER	SSBP2	101088719	transcript	XM_011284330.2	protein_coding	14	c.868-1799A>C
chrA1	147388195	T	G	PASS	G	intron_variant	MODIFIER	SSBP2	101088719	transcript	XM_011284326.3	protein_coding	14	c.892-1799A>C
chrA1	147388195	T	G	PASS	G	intron_variant	MODIFIER	SSBP2	101088719	transcript	XM_019836180.1	protein_coding	15	c.961-1799A>C
chrA1	147388854	C	T	PASS	T	intron_variant	MODIFIER	SSBP2	101088719	transcript	XM_011284322.2	protein_coding	15	c.982-2458G>A
chrA1	147388854	C	T	PASS	T	intron_variant	MODIFIER	SSBP2	101088719	transcript	XM_011284323.3	protein_coding	15	c.958-2458G>A
chrA1	147388854	C	T	PASS	T	intron_variant	MODIFIER	SSBP2	101088719	transcript	XM_011284330.2	protein_coding	14	c.868-2458G>A
chrA1	147388854	C	T	PASS	T	intron_variant	MODIFIER	SSBP2	101088719	transcript	XM_011284326.3	protein_coding	14	c.892-2458G>A
chrA1	147388854	C	T	PASS	T	intron_variant	MODIFIER	SSBP2	101088719	transcript	XM_019836180.1	protein_coding	15	c.961-2458G>A
chrA1	147389751	G	GT	PASS	GT	intron_variant	MODIFIER	SSBP2	101088719	transcript	XM_011284322.2	protein_coding	15	c.982-3356_982-3355insA
chrA1	147389751	G	GT	PASS	GT	intron_variant	MODIFIER	SSBP2	101088719	transcript	XM_011284323.3	protein_coding	15	c.958-3356_958-3355insA
chrA1	147389751	G	GT	PASS	GT	intron_variant	MODIFIER	SSBP2	101088719	transcript	XM_011284330.2	protein_coding	14	c.868-3356_868-3355insA
chrA1	147389751	G	GT	PASS	GT	intron_variant	MODIFIER	SSBP2	101088719	transcript	XM_011284326.3	protein_coding	14	c.892-3356_892-3355insA
chrA1	147389751	G	GT	PASS	GT	intron_variant	MODIFIER	SSBP2	101088719	transcript	XM_019836180.1	protein_coding	15	c.961-3356_961-3355insA
chrA1	147393328	G	A	PASS	A	intron_variant	MODIFIER	SSBP2	101088719	transcript	XM_011284322.2	protein_coding	15	c.982-6932C>T
chrA1	147393328	G	A	PASS	A	intron_variant	MODIFIER	SSBP2	101088719	transcript	XM_011284323.3	protein_coding	15	c.958-6932C>T
chrA1	147393328	G	A	PASS	A	intron_variant	MODIFIER	SSBP2	101088719	transcript	XM_011284330.2	protein_coding	14	c.868-6932C>T
chrA1	147393328	G	A	PASS	A	intron_variant	MODIFIER	SSBP2	101088719	transcript	XM_011284326.3	protein_coding	14	c.892-6932C>T
chrA1	147393328	G	A	PASS	A	intron_variant	MODIFIER	SSBP2	101088719	transcript	XM_019836180.1	protein_coding	15	c.961-6932C>T
chrA1	147393808	G	A	PASS	A	intron_variant	MODIFIER	SSBP2	101088719	transcript	XM_011284322.2	protein_coding	15	c.981+6588C>T
chrA1	147393808	G	A	PASS	A	intron_variant	MODIFIER	SSBP2	101088719	transcript	XM_011284323.3	protein_coding	15	c.957+6588C>T
chrA1	147393808	G	A	PASS	A	intron_variant	MODIFIER	SSBP2	101088719	transcript	XM_011284330.2	protein_coding	14	c.867+6588C>T
chrA1	147393808	G	A	PASS	A	intron_variant	MODIFIER	SSBP2	101088719	transcript	XM_011284326.3	protein_coding	14	c.891+6588C>T
chrA1	147393808	G	A	PASS	A	intron_variant	MODIFIER	SSBP2	101088719	transcript	XM_019836180.1	protein_coding	15	c.960+6588C>T
chrA1	147395046	C	T	PASS	T	intron_variant	MODIFIER	SSBP2	101088719	transcript	XM_011284322.2	protein_coding	15	c.981+5350G>A
chrA1	147395046	C	T	PASS	T	intron_variant	MODIFIER	SSBP2	101088719	transcript	XM_011284323.3	protein_coding	15	c.957+5350G>A
chrA1	147395046	C	T	PASS	T	intron_variant	MODIFIER	SSBP2	101088719	transcript	XM_011284330.2	protein_coding	14	c.867+5350G>A
chrA1	147395046	C	T	PASS	T	intron_variant	MODIFIER	SSBP2	101088719	transcript	XM_011284326.3	protein_coding	14	c.891+5350G>A
chrA1	147395046	C	T	PASS	T	intron_variant	MODIFIER	SSBP2	101088719	transcript	XM_019836180.1	protein_coding	15	c.960+5350G>A
chrA1	147395084	G	A	PASS	A	intron_variant	MODIFIER	SSBP2	101088719	transcript	XM_011284322.2	protein_coding	15	c.981+5312C>T
chrA1	147395084	G	A	PASS	A	intron_variant	MODIFIER	SSBP2	101088719	transcript	XM_011284323.3	protein_coding	15	c.957+5312C>T
chrA1	147395084	G	A	PASS	A	intron_variant	MODIFIER	SSBP2	101088719	transcript	XM_011284330.2	protein_coding	14	c.867+5312C>T
chrA1	147395084	G	A	PASS	A	intron_variant	MODIFIER	SSBP2	101088719	transcript	XM_011284326.3	protein_coding	14	c.891+5312C>T
chrA1	147395084	G	A	PASS	A	intron_variant	MODIFIER	SSBP2	101088719	transcript	XM_019836180.1	protein_coding	15	c.960+5312C>T
chrA1	147395364	T	G	PASS	G	intron_variant	MODIFIER	SSBP2	101088719	transcript	XM_011284322.2	protein_coding	15	c.981+5032A>C
chrA1	147395364	T	G	PASS	G	intron_variant	MODIFIER	SSBP2	101088719	transcript	XM_011284323.3	protein_coding	15	c.957+5032A>C
chrA1	147395364	T	G	PASS	G	intron_variant	MODIFIER	SSBP2	101088719	transcript	XM_011284330.2	protein_coding	14	c.867+5032A>C
chrA1	147395364	T	G	PASS	G	intron_variant	MODIFIER	SSBP2	101088719	transcript	XM_011284326.3	protein_coding	14	c.891+5032A>C
chrA1	147395364	T	G	PASS	G	intron_variant	MODIFIER	SSBP2	101088719	transcript	XM_019836180.1	protein_coding	15	c.960+5032A>C
chrA1	147396953	A	G	PASS	G	intron_variant	MODIFIER	SSBP2	101088719	transcript	XM_011284322.2	protein_coding	15	c.981+3443T>C
chrA1	147396953	A	G	PASS	G	intron_variant	MODIFIER	SSBP2	101088719	transcript	XM_011284323.3	protein_coding	15	c.957+3443T>C
chrA1	147396953	A	G	PASS	G	intron_variant	MODIFIER	SSBP2	101088719	transcript	XM_011284330.2	protein_coding	14	c.867+3443T>C
chrA1	147396953	A	G	PASS	G	intron_variant	MODIFIER	SSBP2	101088719	transcript	XM_011284326.3	protein_coding	14	c.891+3443T>C
chrA1	147396953	A	G	PASS	G	intron_variant	MODIFIER	SSBP2	101088719	transcript	XM_019836180.1	protein_coding	15	c.960+3443T>C
chrA1	147397248	A	C	PASS	C	intron_variant	MODIFIER	SSBP2	101088719	transcript	XM_011284322.2	protein_coding	15	c.981+3148T>G
chrA1	147397248	A	C	PASS	C	intron_variant	MODIFIER	SSBP2	101088719	transcript	XM_011284323.3	protein_coding	15	c.957+3148T>G
chrA1	147397248	A	C	PASS	C	intron_variant	MODIFIER	SSBP2	101088719	transcript	XM_011284330.2	protein_coding	14	c.867+3148T>G
chrA1	147397248	A	C	PASS	C	intron_variant	MODIFIER	SSBP2	101088719	transcript	XM_011284326.3	protein_coding	14	c.891+3148T>G
chrA1	147397248	A	C	PASS	C	intron_variant	MODIFIER	SSBP2	101088719	transcript	XM_019836180.1	protein_coding	15	c.960+3148T>G
chrA1	147397716	A	G	PASS	G	intron_variant	MODIFIER	SSBP2	101088719	transcript	XM_011284322.2	protein_coding	15	c.981+2680T>C
chrA1	147397716	A	G	PASS	G	intron_variant	MODIFIER	SSBP2	101088719	transcript	XM_011284323.3	protein_coding	15	c.957+2680T>C
chrA1	147397716	A	G	PASS	G	intron_variant	MODIFIER	SSBP2	101088719	transcript	XM_011284330.2	protein_coding	14	c.867+2680T>C
chrA1	147397716	A	G	PASS	G	intron_variant	MODIFIER	SSBP2	101088719	transcript	XM_011284326.3	protein_coding	14	c.891+2680T>C
chrA1	147397716	A	G	PASS	G	intron_variant	MODIFIER	SSBP2	101088719	transcript	XM_019836180.1	protein_coding	15	c.960+2680T>C
chrA1	147399050	T	TG	PASS	TG	intron_variant	MODIFIER	SSBP2	101088719	transcript	XM_011284322.2	protein_coding	15	c.981+1345_981+1346insC
chrA1	147399050	T	TG	PASS	TG	intron_variant	MODIFIER	SSBP2	101088719	transcript	XM_011284323.3	protein_coding	15	c.957+1345_957+1346insC
chrA1	147399050	T	TG	PASS	TG	intron_variant	MODIFIER	SSBP2	101088719	transcript	XM_011284330.2	protein_coding	14	c.867+1345_867+1346insC
chrA1	147399050	T	TG	PASS	TG	intron_variant	MODIFIER	SSBP2	101088719	transcript	XM_011284326.3	protein_coding	14	c.891+1345_891+1346insC
chrA1	147399050	T	TG	PASS	TG	intron_variant	MODIFIER	SSBP2	101088719	transcript	XM_019836180.1	protein_coding	15	c.960+1345_960+1346insC
chrA1	147399094	T	C	PASS	C	intron_variant	MODIFIER	SSBP2	101088719	transcript	XM_011284322.2	protein_coding	15	c.981+1302A>G
chrA1	147399094	T	C	PASS	C	intron_variant	MODIFIER	SSBP2	101088719	transcript	XM_011284323.3	protein_coding	15	c.957+1302A>G
chrA1	147399094	T	C	PASS	C	intron_variant	MODIFIER	SSBP2	101088719	transcript	XM_011284330.2	protein_coding	14	c.867+1302A>G
chrA1	147399094	T	C	PASS	C	intron_variant	MODIFIER	SSBP2	101088719	transcript	XM_011284326.3	protein_coding	14	c.891+1302A>G
chrA1	147399094	T	C	PASS	C	intron_variant	MODIFIER	SSBP2	101088719	transcript	XM_019836180.1	protein_coding	15	c.960+1302A>G
chrA1	147399636	TAA	T	PASS	T	intron_variant	MODIFIER	SSBP2	101088719	transcript	XM_011284322.2	protein_coding	15	c.981+758_981+759delTT
chrA1	147399636	TAA	T	PASS	T	intron_variant	MODIFIER	SSBP2	101088719	transcript	XM_011284323.3	protein_coding	15	c.957+758_957+759delTT
chrA1	147399636	TAA	T	PASS	T	intron_variant	MODIFIER	SSBP2	101088719	transcript	XM_011284330.2	protein_coding	14	c.867+758_867+759delTT
chrA1	147399636	TAA	T	PASS	T	intron_variant	MODIFIER	SSBP2	101088719	transcript	XM_011284326.3	protein_coding	14	c.891+758_891+759delTT
chrA1	147399636	TAA	T	PASS	T	intron_variant	MODIFIER	SSBP2	101088719	transcript	XM_019836180.1	protein_coding	15	c.960+758_960+759delTT
chrA1	147400093	G	A	PASS	A	intron_variant	MODIFIER	SSBP2	101088719	transcript	XM_011284322.2	protein_coding	15	c.981+303C>T
chrA1	147400093	G	A	PASS	A	intron_variant	MODIFIER	SSBP2	101088719	transcript	XM_011284323.3	protein_coding	15	c.957+303C>T
chrA1	147400093	G	A	PASS	A	intron_variant	MODIFIER	SSBP2	101088719	transcript	XM_011284330.2	protein_coding	14	c.867+303C>T
chrA1	147400093	G	A	PASS	A	intron_variant	MODIFIER	SSBP2	101088719	transcript	XM_011284326.3	protein_coding	14	c.891+303C>T
chrA1	147400093	G	A	PASS	A	intron_variant	MODIFIER	SSBP2	101088719	transcript	XM_019836180.1	protein_coding	15	c.960+303C>T
chrA1	147402653	G	A	PASS	A	intron_variant	MODIFIER	SSBP2	101088719	transcript	XM_011284322.2	protein_coding	14	c.952+288C>T
chrA1	147402653	G	A	PASS	A	intron_variant	MODIFIER	SSBP2	101088719	transcript	XM_011284323.3	protein_coding	14	c.928+288C>T
chrA1	147402653	G	A	PASS	A	intron_variant	MODIFIER	SSBP2	101088719	transcript	XM_011284330.2	protein_coding	13	c.838+288C>T
chrA1	147402653	G	A	PASS	A	intron_variant	MODIFIER	SSBP2	101088719	transcript	XM_011284326.3	protein_coding	13	c.862+288C>T
chrA1	147402653	G	A	PASS	A	intron_variant	MODIFIER	SSBP2	101088719	transcript	XM_019836180.1	protein_coding	14	c.931+288C>T
chrA1	147402866	T	C	PASS	C	intron_variant	MODIFIER	SSBP2	101088719	transcript	XM_011284322.2	protein_coding	14	c.952+75A>G
chrA1	147402866	T	C	PASS	C	intron_variant	MODIFIER	SSBP2	101088719	transcript	XM_011284323.3	protein_coding	14	c.928+75A>G
chrA1	147402866	T	C	PASS	C	intron_variant	MODIFIER	SSBP2	101088719	transcript	XM_011284330.2	protein_coding	13	c.838+75A>G
chrA1	147402866	T	C	PASS	C	intron_variant	MODIFIER	SSBP2	101088719	transcript	XM_011284326.3	protein_coding	13	c.862+75A>G
chrA1	147402866	T	C	PASS	C	intron_variant	MODIFIER	SSBP2	101088719	transcript	XM_019836180.1	protein_coding	14	c.931+75A>G
chrA1	147403840	C	G	PASS	G	intron_variant	MODIFIER	SSBP2	101088719	transcript	XM_011284322.2	protein_coding	13	c.874-821G>C
chrA1	147403840	C	G	PASS	G	intron_variant	MODIFIER	SSBP2	101088719	transcript	XM_011284323.3	protein_coding	13	c.850-821G>C
chrA1	147403840	C	G	PASS	G	intron_variant	MODIFIER	SSBP2	101088719	transcript	XM_011284330.2	protein_coding	12	c.760-821G>C
chrA1	147403840	C	G	PASS	G	intron_variant	MODIFIER	SSBP2	101088719	transcript	XM_011284326.3	protein_coding	12	c.784-821G>C
chrA1	147403840	C	G	PASS	G	intron_variant	MODIFIER	SSBP2	101088719	transcript	XM_019836180.1	protein_coding	13	c.853-821G>C
chrA1	147403893	CTGAATGTGGTGTGTG	C	PASS	C	intron_variant	MODIFIER	SSBP2	101088719	transcript	XM_011284322.2	protein_coding	13	c.874-889_874-875delCACACACCACATTCA
chrA1	147403893	CTGAATGTGGTGTGTG	C	PASS	C	intron_variant	MODIFIER	SSBP2	101088719	transcript	XM_011284323.3	protein_coding	13	c.850-889_850-875delCACACACCACATTCA
chrA1	147403893	CTGAATGTGGTGTGTG	C	PASS	C	intron_variant	MODIFIER	SSBP2	101088719	transcript	XM_011284330.2	protein_coding	12	c.760-889_760-875delCACACACCACATTCA
chrA1	147403893	CTGAATGTGGTGTGTG	C	PASS	C	intron_variant	MODIFIER	SSBP2	101088719	transcript	XM_011284326.3	protein_coding	12	c.784-889_784-875delCACACACCACATTCA
chrA1	147403893	CTGAATGTGGTGTGTG	C	PASS	C	intron_variant	MODIFIER	SSBP2	101088719	transcript	XM_019836180.1	protein_coding	13	c.853-889_853-875delCACACACCACATTCA
chrA1	147405845	A	G	PASS	G	intron_variant	MODIFIER	SSBP2	101088719	transcript	XM_011284322.2	protein_coding	13	c.873+156T>C
chrA1	147405845	A	G	PASS	G	intron_variant	MODIFIER	SSBP2	101088719	transcript	XM_011284323.3	protein_coding	13	c.849+156T>C
chrA1	147405845	A	G	PASS	G	intron_variant	MODIFIER	SSBP2	101088719	transcript	XM_011284330.2	protein_coding	12	c.759+156T>C
chrA1	147405845	A	G	PASS	G	intron_variant	MODIFIER	SSBP2	101088719	transcript	XM_011284326.3	protein_coding	12	c.783+156T>C
chrA1	147405845	A	G	PASS	G	intron_variant	MODIFIER	SSBP2	101088719	transcript	XM_019836180.1	protein_coding	13	c.852+156T>C
chrA1	147409137	C	T	PASS	T	intron_variant	MODIFIER	SSBP2	101088719	transcript	XM_011284322.2	protein_coding	12	c.802+205G>A
chrA1	147409137	C	T	PASS	T	intron_variant	MODIFIER	SSBP2	101088719	transcript	XM_011284323.3	protein_coding	12	c.778+205G>A
chrA1	147409137	C	T	PASS	T	intron_variant	MODIFIER	SSBP2	101088719	transcript	XM_011284330.2	protein_coding	11	c.688+205G>A
chrA1	147409137	C	T	PASS	T	intron_variant	MODIFIER	SSBP2	101088719	transcript	XM_011284326.3	protein_coding	11	c.712+205G>A
chrA1	147409137	C	T	PASS	T	intron_variant	MODIFIER	SSBP2	101088719	transcript	XM_019836180.1	protein_coding	12	c.781+205G>A
chrA1	147413343	T	C	PASS	C	intron_variant	MODIFIER	SSBP2	101088719	transcript	XM_011284322.2	protein_coding	10	c.712-2096A>G
chrA1	147413343	T	C	PASS	C	intron_variant	MODIFIER	SSBP2	101088719	transcript	XM_011284323.3	protein_coding	10	c.688-2096A>G
chrA1	147413343	T	C	PASS	C	intron_variant	MODIFIER	SSBP2	101088719	transcript	XM_011284330.2	protein_coding	9	c.598-2096A>G
chrA1	147413343	T	C	PASS	C	intron_variant	MODIFIER	SSBP2	101088719	transcript	XM_011284326.3	protein_coding	9	c.622-2096A>G
chrA1	147413343	T	C	PASS	C	intron_variant	MODIFIER	SSBP2	101088719	transcript	XM_019836180.1	protein_coding	10	c.691-2096A>G
chrA1	147413657	A	G	PASS	G	intron_variant	MODIFIER	SSBP2	101088719	transcript	XM_011284322.2	protein_coding	10	c.712-2410T>C
chrA1	147413657	A	G	PASS	G	intron_variant	MODIFIER	SSBP2	101088719	transcript	XM_011284323.3	protein_coding	10	c.688-2410T>C
chrA1	147413657	A	G	PASS	G	intron_variant	MODIFIER	SSBP2	101088719	transcript	XM_011284330.2	protein_coding	9	c.598-2410T>C
chrA1	147413657	A	G	PASS	G	intron_variant	MODIFIER	SSBP2	101088719	transcript	XM_011284326.3	protein_coding	9	c.622-2410T>C
chrA1	147413657	A	G	PASS	G	intron_variant	MODIFIER	SSBP2	101088719	transcript	XM_019836180.1	protein_coding	10	c.691-2410T>C
chrA1	147418178	G	A	PASS	A	intron_variant	MODIFIER	SSBP2	101088719	transcript	XM_011284322.2	protein_coding	10	c.711+4673C>T
chrA1	147418178	G	A	PASS	A	intron_variant	MODIFIER	SSBP2	101088719	transcript	XM_011284323.3	protein_coding	10	c.687+4673C>T
chrA1	147418178	G	A	PASS	A	intron_variant	MODIFIER	SSBP2	101088719	transcript	XM_011284330.2	protein_coding	9	c.597+4673C>T
chrA1	147418178	G	A	PASS	A	intron_variant	MODIFIER	SSBP2	101088719	transcript	XM_011284326.3	protein_coding	9	c.621+4673C>T
chrA1	147418178	G	A	PASS	A	intron_variant	MODIFIER	SSBP2	101088719	transcript	XM_019836180.1	protein_coding	10	c.690+4673C>T
chrA1	147418570	G	A	PASS	A	intron_variant	MODIFIER	SSBP2	101088719	transcript	XM_011284322.2	protein_coding	10	c.711+4281C>T
chrA1	147418570	G	A	PASS	A	intron_variant	MODIFIER	SSBP2	101088719	transcript	XM_011284323.3	protein_coding	10	c.687+4281C>T
chrA1	147418570	G	A	PASS	A	intron_variant	MODIFIER	SSBP2	101088719	transcript	XM_011284330.2	protein_coding	9	c.597+4281C>T
chrA1	147418570	G	A	PASS	A	intron_variant	MODIFIER	SSBP2	101088719	transcript	XM_011284326.3	protein_coding	9	c.621+4281C>T
chrA1	147418570	G	A	PASS	A	intron_variant	MODIFIER	SSBP2	101088719	transcript	XM_019836180.1	protein_coding	10	c.690+4281C>T
chrA1	147418817	T	C	PASS	C	intron_variant	MODIFIER	SSBP2	101088719	transcript	XM_011284322.2	protein_coding	10	c.711+4034A>G
chrA1	147418817	T	C	PASS	C	intron_variant	MODIFIER	SSBP2	101088719	transcript	XM_011284323.3	protein_coding	10	c.687+4034A>G
chrA1	147418817	T	C	PASS	C	intron_variant	MODIFIER	SSBP2	101088719	transcript	XM_011284330.2	protein_coding	9	c.597+4034A>G
chrA1	147418817	T	C	PASS	C	intron_variant	MODIFIER	SSBP2	101088719	transcript	XM_011284326.3	protein_coding	9	c.621+4034A>G
chrA1	147418817	T	C	PASS	C	intron_variant	MODIFIER	SSBP2	101088719	transcript	XM_019836180.1	protein_coding	10	c.690+4034A>G
chrA1	147419070	T	A	PASS	A	intron_variant	MODIFIER	SSBP2	101088719	transcript	XM_011284322.2	protein_coding	10	c.711+3781A>T
chrA1	147419070	T	A	PASS	A	intron_variant	MODIFIER	SSBP2	101088719	transcript	XM_011284323.3	protein_coding	10	c.687+3781A>T
chrA1	147419070	T	A	PASS	A	intron_variant	MODIFIER	SSBP2	101088719	transcript	XM_011284330.2	protein_coding	9	c.597+3781A>T
chrA1	147419070	T	A	PASS	A	intron_variant	MODIFIER	SSBP2	101088719	transcript	XM_011284326.3	protein_coding	9	c.621+3781A>T
chrA1	147419070	T	A	PASS	A	intron_variant	MODIFIER	SSBP2	101088719	transcript	XM_019836180.1	protein_coding	10	c.690+3781A>T
chrA1	147420316	G	A	PASS	A	intron_variant	MODIFIER	SSBP2	101088719	transcript	XM_011284322.2	protein_coding	10	c.711+2535C>T
chrA1	147420316	G	A	PASS	A	intron_variant	MODIFIER	SSBP2	101088719	transcript	XM_011284323.3	protein_coding	10	c.687+2535C>T
chrA1	147420316	G	A	PASS	A	intron_variant	MODIFIER	SSBP2	101088719	transcript	XM_011284330.2	protein_coding	9	c.597+2535C>T
chrA1	147420316	G	A	PASS	A	intron_variant	MODIFIER	SSBP2	101088719	transcript	XM_011284326.3	protein_coding	9	c.621+2535C>T
chrA1	147420316	G	A	PASS	A	intron_variant	MODIFIER	SSBP2	101088719	transcript	XM_019836180.1	protein_coding	10	c.690+2535C>T
chrA1	147420454	G	A	PASS	A	intron_variant	MODIFIER	SSBP2	101088719	transcript	XM_011284322.2	protein_coding	10	c.711+2397C>T
chrA1	147420454	G	A	PASS	A	intron_variant	MODIFIER	SSBP2	101088719	transcript	XM_011284323.3	protein_coding	10	c.687+2397C>T
chrA1	147420454	G	A	PASS	A	intron_variant	MODIFIER	SSBP2	101088719	transcript	XM_011284330.2	protein_coding	9	c.597+2397C>T
chrA1	147420454	G	A	PASS	A	intron_variant	MODIFIER	SSBP2	101088719	transcript	XM_011284326.3	protein_coding	9	c.621+2397C>T
chrA1	147420454	G	A	PASS	A	intron_variant	MODIFIER	SSBP2	101088719	transcript	XM_019836180.1	protein_coding	10	c.690+2397C>T
chrA1	147425223	T	A	PASS	A	intron_variant	MODIFIER	SSBP2	101088719	transcript	XM_011284322.2	protein_coding	9	c.663-2324A>T
chrA1	147425223	T	A	PASS	A	intron_variant	MODIFIER	SSBP2	101088719	transcript	XM_011284323.3	protein_coding	9	c.639-2324A>T
chrA1	147425223	T	A	PASS	A	intron_variant	MODIFIER	SSBP2	101088719	transcript	XM_011284330.2	protein_coding	8	c.549-2324A>T
chrA1	147425223	T	A	PASS	A	intron_variant	MODIFIER	SSBP2	101088719	transcript	XM_011284326.3	protein_coding	8	c.573-2324A>T
chrA1	147425223	T	A	PASS	A	intron_variant	MODIFIER	SSBP2	101088719	transcript	XM_019836180.1	protein_coding	9	c.642-2324A>T
chrA1	147425433	C	G	PASS	G	intron_variant	MODIFIER	SSBP2	101088719	transcript	XM_011284322.2	protein_coding	9	c.663-2534G>C
chrA1	147425433	C	G	PASS	G	intron_variant	MODIFIER	SSBP2	101088719	transcript	XM_011284323.3	protein_coding	9	c.639-2534G>C
chrA1	147425433	C	G	PASS	G	intron_variant	MODIFIER	SSBP2	101088719	transcript	XM_011284330.2	protein_coding	8	c.549-2534G>C
chrA1	147425433	C	G	PASS	G	intron_variant	MODIFIER	SSBP2	101088719	transcript	XM_011284326.3	protein_coding	8	c.573-2534G>C
chrA1	147425433	C	G	PASS	G	intron_variant	MODIFIER	SSBP2	101088719	transcript	XM_019836180.1	protein_coding	9	c.642-2534G>C
chrA1	147425607	TA	T	PASS	T	intron_variant	MODIFIER	SSBP2	101088719	transcript	XM_011284322.2	protein_coding	9	c.663-2709delT
chrA1	147425607	TA	T	PASS	T	intron_variant	MODIFIER	SSBP2	101088719	transcript	XM_011284323.3	protein_coding	9	c.639-2709delT
chrA1	147425607	TA	T	PASS	T	intron_variant	MODIFIER	SSBP2	101088719	transcript	XM_011284330.2	protein_coding	8	c.549-2709delT
chrA1	147425607	TA	T	PASS	T	intron_variant	MODIFIER	SSBP2	101088719	transcript	XM_011284326.3	protein_coding	8	c.573-2709delT
chrA1	147425607	TA	T	PASS	T	intron_variant	MODIFIER	SSBP2	101088719	transcript	XM_019836180.1	protein_coding	9	c.642-2709delT
chrA1	147427137	TAATAC	T	PASS	T	intron_variant	MODIFIER	SSBP2	101088719	transcript	XM_011284322.2	protein_coding	9	c.662+1920_662+1924delGTATT
chrA1	147427137	TAATAC	T	PASS	T	intron_variant	MODIFIER	SSBP2	101088719	transcript	XM_011284323.3	protein_coding	9	c.638+1920_638+1924delGTATT
chrA1	147427137	TAATAC	T	PASS	T	intron_variant	MODIFIER	SSBP2	101088719	transcript	XM_011284330.2	protein_coding	8	c.548+1920_548+1924delGTATT
chrA1	147427137	TAATAC	T	PASS	T	intron_variant	MODIFIER	SSBP2	101088719	transcript	XM_011284326.3	protein_coding	8	c.572+1920_572+1924delGTATT
chrA1	147427137	TAATAC	T	PASS	T	intron_variant	MODIFIER	SSBP2	101088719	transcript	XM_019836180.1	protein_coding	9	c.641+1920_641+1924delGTATT
chrA1	147427224	A	G	PASS	G	intron_variant	MODIFIER	SSBP2	101088719	transcript	XM_011284322.2	protein_coding	9	c.662+1838T>C
chrA1	147427224	A	G	PASS	G	intron_variant	MODIFIER	SSBP2	101088719	transcript	XM_011284323.3	protein_coding	9	c.638+1838T>C
chrA1	147427224	A	G	PASS	G	intron_variant	MODIFIER	SSBP2	101088719	transcript	XM_011284330.2	protein_coding	8	c.548+1838T>C
chrA1	147427224	A	G	PASS	G	intron_variant	MODIFIER	SSBP2	101088719	transcript	XM_011284326.3	protein_coding	8	c.572+1838T>C
chrA1	147427224	A	G	PASS	G	intron_variant	MODIFIER	SSBP2	101088719	transcript	XM_019836180.1	protein_coding	9	c.641+1838T>C
chrA1	147428962	C	T	PASS	T	intron_variant	MODIFIER	SSBP2	101088719	transcript	XM_011284322.2	protein_coding	9	c.662+100G>A
chrA1	147428962	C	T	PASS	T	intron_variant	MODIFIER	SSBP2	101088719	transcript	XM_011284323.3	protein_coding	9	c.638+100G>A
chrA1	147428962	C	T	PASS	T	intron_variant	MODIFIER	SSBP2	101088719	transcript	XM_011284330.2	protein_coding	8	c.548+100G>A
chrA1	147428962	C	T	PASS	T	intron_variant	MODIFIER	SSBP2	101088719	transcript	XM_011284326.3	protein_coding	8	c.572+100G>A
chrA1	147428962	C	T	PASS	T	intron_variant	MODIFIER	SSBP2	101088719	transcript	XM_019836180.1	protein_coding	9	c.641+100G>A
chrA1	147430961	C	T	PASS	T	intron_variant	MODIFIER	SSBP2	101088719	transcript	XM_011284322.2	protein_coding	8	c.571-1808G>A
chrA1	147430961	C	T	PASS	T	intron_variant	MODIFIER	SSBP2	101088719	transcript	XM_011284323.3	protein_coding	8	c.571-1832G>A
chrA1	147430961	C	T	PASS	T	intron_variant	MODIFIER	SSBP2	101088719	transcript	XM_011284330.2	protein_coding	7	c.481-1832G>A
chrA1	147430961	C	T	PASS	T	intron_variant	MODIFIER	SSBP2	101088719	transcript	XM_011284326.3	protein_coding	7	c.481-1808G>A
chrA1	147430961	C	T	PASS	T	intron_variant	MODIFIER	SSBP2	101088719	transcript	XM_019836180.1	protein_coding	8	c.550-1808G>A
chrA1	147432417	T	A	PASS	A	intron_variant	MODIFIER	SSBP2	101088719	transcript	XM_011284322.2	protein_coding	8	c.571-3264A>T
chrA1	147432417	T	A	PASS	A	intron_variant	MODIFIER	SSBP2	101088719	transcript	XM_011284323.3	protein_coding	8	c.571-3288A>T
chrA1	147432417	T	A	PASS	A	intron_variant	MODIFIER	SSBP2	101088719	transcript	XM_011284330.2	protein_coding	7	c.481-3288A>T
chrA1	147432417	T	A	PASS	A	intron_variant	MODIFIER	SSBP2	101088719	transcript	XM_011284326.3	protein_coding	7	c.481-3264A>T
chrA1	147432417	T	A	PASS	A	intron_variant	MODIFIER	SSBP2	101088719	transcript	XM_019836180.1	protein_coding	8	c.550-3264A>T
chrA1	147432992	T	C	PASS	C	intron_variant	MODIFIER	SSBP2	101088719	transcript	XM_011284322.2	protein_coding	8	c.570+2868A>G
chrA1	147432992	T	C	PASS	C	intron_variant	MODIFIER	SSBP2	101088719	transcript	XM_011284323.3	protein_coding	8	c.570+2868A>G
chrA1	147432992	T	C	PASS	C	intron_variant	MODIFIER	SSBP2	101088719	transcript	XM_011284330.2	protein_coding	7	c.480+2868A>G
chrA1	147432992	T	C	PASS	C	intron_variant	MODIFIER	SSBP2	101088719	transcript	XM_011284326.3	protein_coding	7	c.480+2868A>G
chrA1	147432992	T	C	PASS	C	intron_variant	MODIFIER	SSBP2	101088719	transcript	XM_019836180.1	protein_coding	8	c.549+2868A>G
chrA1	147434845	A	G	PASS	G	intron_variant	MODIFIER	SSBP2	101088719	transcript	XM_011284322.2	protein_coding	8	c.570+1015T>C
chrA1	147434845	A	G	PASS	G	intron_variant	MODIFIER	SSBP2	101088719	transcript	XM_011284323.3	protein_coding	8	c.570+1015T>C
chrA1	147434845	A	G	PASS	G	intron_variant	MODIFIER	SSBP2	101088719	transcript	XM_011284330.2	protein_coding	7	c.480+1015T>C
chrA1	147434845	A	G	PASS	G	intron_variant	MODIFIER	SSBP2	101088719	transcript	XM_011284326.3	protein_coding	7	c.480+1015T>C
chrA1	147434845	A	G	PASS	G	intron_variant	MODIFIER	SSBP2	101088719	transcript	XM_019836180.1	protein_coding	8	c.549+1015T>C
chrA1	147438176	T	A	PASS	A	intron_variant	MODIFIER	SSBP2	101088719	transcript	XM_011284322.2	protein_coding	6	c.433-1447A>T
chrA1	147438176	T	A	PASS	A	intron_variant	MODIFIER	SSBP2	101088719	transcript	XM_011284323.3	protein_coding	6	c.433-1447A>T
chrA1	147438176	T	A	PASS	A	intron_variant	MODIFIER	SSBP2	101088719	transcript	XM_011284330.2	protein_coding	5	c.343-1447A>T
chrA1	147438176	T	A	PASS	A	intron_variant	MODIFIER	SSBP2	101088719	transcript	XM_011284326.3	protein_coding	5	c.343-1447A>T
chrA1	147438176	T	A	PASS	A	intron_variant	MODIFIER	SSBP2	101088719	transcript	XM_019836180.1	protein_coding	6	c.412-1447A>T
chrA1	147441142	T	G	PASS	G	intron_variant	MODIFIER	SSBP2	101088719	transcript	XM_011284322.2	protein_coding	6	c.433-4413A>C
chrA1	147441142	T	G	PASS	G	intron_variant	MODIFIER	SSBP2	101088719	transcript	XM_011284323.3	protein_coding	6	c.433-4413A>C
chrA1	147441142	T	G	PASS	G	intron_variant	MODIFIER	SSBP2	101088719	transcript	XM_011284330.2	protein_coding	5	c.343-4413A>C
chrA1	147441142	T	G	PASS	G	intron_variant	MODIFIER	SSBP2	101088719	transcript	XM_011284326.3	protein_coding	5	c.343-4413A>C
chrA1	147441142	T	G	PASS	G	intron_variant	MODIFIER	SSBP2	101088719	transcript	XM_019836180.1	protein_coding	6	c.412-4413A>C
chrA1	147441483	T	C	PASS	C	intron_variant	MODIFIER	SSBP2	101088719	transcript	XM_011284322.2	protein_coding	6	c.433-4754A>G
chrA1	147441483	T	C	PASS	C	intron_variant	MODIFIER	SSBP2	101088719	transcript	XM_011284323.3	protein_coding	6	c.433-4754A>G
chrA1	147441483	T	C	PASS	C	intron_variant	MODIFIER	SSBP2	101088719	transcript	XM_011284330.2	protein_coding	5	c.343-4754A>G
chrA1	147441483	T	C	PASS	C	intron_variant	MODIFIER	SSBP2	101088719	transcript	XM_011284326.3	protein_coding	5	c.343-4754A>G
chrA1	147441483	T	C	PASS	C	intron_variant	MODIFIER	SSBP2	101088719	transcript	XM_019836180.1	protein_coding	6	c.412-4754A>G
chrA1	147443323	TG	T	PASS	T	intron_variant	MODIFIER	SSBP2	101088719	transcript	XM_011284322.2	protein_coding	6	c.432+5138delC
chrA1	147443323	TG	T	PASS	T	intron_variant	MODIFIER	SSBP2	101088719	transcript	XM_011284323.3	protein_coding	6	c.432+5138delC
chrA1	147443323	TG	T	PASS	T	intron_variant	MODIFIER	SSBP2	101088719	transcript	XM_011284330.2	protein_coding	5	c.342+5138delC
chrA1	147443323	TG	T	PASS	T	intron_variant	MODIFIER	SSBP2	101088719	transcript	XM_011284326.3	protein_coding	5	c.342+5138delC
chrA1	147443323	TG	T	PASS	T	intron_variant	MODIFIER	SSBP2	101088719	transcript	XM_019836180.1	protein_coding	6	c.411+5138delC
chrA1	147443433	T	C	PASS	C	intron_variant	MODIFIER	SSBP2	101088719	transcript	XM_011284322.2	protein_coding	6	c.432+5029A>G
chrA1	147443433	T	C	PASS	C	intron_variant	MODIFIER	SSBP2	101088719	transcript	XM_011284323.3	protein_coding	6	c.432+5029A>G
chrA1	147443433	T	C	PASS	C	intron_variant	MODIFIER	SSBP2	101088719	transcript	XM_011284330.2	protein_coding	5	c.342+5029A>G
chrA1	147443433	T	C	PASS	C	intron_variant	MODIFIER	SSBP2	101088719	transcript	XM_011284326.3	protein_coding	5	c.342+5029A>G
chrA1	147443433	T	C	PASS	C	intron_variant	MODIFIER	SSBP2	101088719	transcript	XM_019836180.1	protein_coding	6	c.411+5029A>G
chrA1	147445138	G	A	PASS	A	intron_variant	MODIFIER	SSBP2	101088719	transcript	XM_011284322.2	protein_coding	6	c.432+3324C>T
chrA1	147445138	G	A	PASS	A	intron_variant	MODIFIER	SSBP2	101088719	transcript	XM_011284323.3	protein_coding	6	c.432+3324C>T
chrA1	147445138	G	A	PASS	A	intron_variant	MODIFIER	SSBP2	101088719	transcript	XM_011284330.2	protein_coding	5	c.342+3324C>T
chrA1	147445138	G	A	PASS	A	intron_variant	MODIFIER	SSBP2	101088719	transcript	XM_011284326.3	protein_coding	5	c.342+3324C>T
chrA1	147445138	G	A	PASS	A	intron_variant	MODIFIER	SSBP2	101088719	transcript	XM_019836180.1	protein_coding	6	c.411+3324C>T
chrA1	147445845	T	C	PASS	C	intron_variant	MODIFIER	SSBP2	101088719	transcript	XM_011284322.2	protein_coding	6	c.432+2617A>G
chrA1	147445845	T	C	PASS	C	intron_variant	MODIFIER	SSBP2	101088719	transcript	XM_011284323.3	protein_coding	6	c.432+2617A>G
chrA1	147445845	T	C	PASS	C	intron_variant	MODIFIER	SSBP2	101088719	transcript	XM_011284330.2	protein_coding	5	c.342+2617A>G
chrA1	147445845	T	C	PASS	C	intron_variant	MODIFIER	SSBP2	101088719	transcript	XM_011284326.3	protein_coding	5	c.342+2617A>G
chrA1	147445845	T	C	PASS	C	intron_variant	MODIFIER	SSBP2	101088719	transcript	XM_019836180.1	protein_coding	6	c.411+2617A>G
chrA1	147452380	G	A	PASS	A	intron_variant	MODIFIER	SSBP2	101088719	transcript	XM_011284322.2	protein_coding	5	c.373-3859C>T
chrA1	147452380	G	A	PASS	A	intron_variant	MODIFIER	SSBP2	101088719	transcript	XM_011284323.3	protein_coding	5	c.373-3859C>T
chrA1	147452380	G	A	PASS	A	intron_variant	MODIFIER	SSBP2	101088719	transcript	XM_011284330.2	protein_coding	4	c.283-3859C>T
chrA1	147452380	G	A	PASS	A	intron_variant	MODIFIER	SSBP2	101088719	transcript	XM_011284326.3	protein_coding	4	c.283-3859C>T
chrA1	147452380	G	A	PASS	A	intron_variant	MODIFIER	SSBP2	101088719	transcript	XM_019836180.1	protein_coding	5	c.352-3859C>T
chrA1	147455335	T	C	PASS	C	intron_variant	MODIFIER	SSBP2	101088719	transcript	XM_011284322.2	protein_coding	5	c.373-6814A>G
chrA1	147455335	T	C	PASS	C	intron_variant	MODIFIER	SSBP2	101088719	transcript	XM_011284323.3	protein_coding	5	c.373-6814A>G
chrA1	147455335	T	C	PASS	C	intron_variant	MODIFIER	SSBP2	101088719	transcript	XM_011284330.2	protein_coding	4	c.283-6814A>G
chrA1	147455335	T	C	PASS	C	intron_variant	MODIFIER	SSBP2	101088719	transcript	XM_011284326.3	protein_coding	4	c.283-6814A>G
chrA1	147455335	T	C	PASS	C	intron_variant	MODIFIER	SSBP2	101088719	transcript	XM_019836180.1	protein_coding	5	c.352-6814A>G
chrA1	147456374	G	A	PASS	A	intron_variant	MODIFIER	SSBP2	101088719	transcript	XM_011284322.2	protein_coding	5	c.373-7853C>T
chrA1	147456374	G	A	PASS	A	intron_variant	MODIFIER	SSBP2	101088719	transcript	XM_011284323.3	protein_coding	5	c.373-7853C>T
chrA1	147456374	G	A	PASS	A	intron_variant	MODIFIER	SSBP2	101088719	transcript	XM_011284330.2	protein_coding	4	c.283-7853C>T
chrA1	147456374	G	A	PASS	A	intron_variant	MODIFIER	SSBP2	101088719	transcript	XM_011284326.3	protein_coding	4	c.283-7853C>T
chrA1	147456374	G	A	PASS	A	intron_variant	MODIFIER	SSBP2	101088719	transcript	XM_019836180.1	protein_coding	5	c.352-7853C>T
chrA1	147456948	T	C	PASS	C	intron_variant	MODIFIER	SSBP2	101088719	transcript	XM_011284322.2	protein_coding	5	c.373-8427A>G
chrA1	147456948	T	C	PASS	C	intron_variant	MODIFIER	SSBP2	101088719	transcript	XM_011284323.3	protein_coding	5	c.373-8427A>G
chrA1	147456948	T	C	PASS	C	intron_variant	MODIFIER	SSBP2	101088719	transcript	XM_011284330.2	protein_coding	4	c.283-8427A>G
chrA1	147456948	T	C	PASS	C	intron_variant	MODIFIER	SSBP2	101088719	transcript	XM_011284326.3	protein_coding	4	c.283-8427A>G
chrA1	147456948	T	C	PASS	C	intron_variant	MODIFIER	SSBP2	101088719	transcript	XM_019836180.1	protein_coding	5	c.352-8427A>G
chrA1	147457450	ATAT	A	PASS	A	intron_variant	MODIFIER	SSBP2	101088719	transcript	XM_011284322.2	protein_coding	5	c.373-8932_373-8930delATA
chrA1	147457450	ATAT	A	PASS	A	intron_variant	MODIFIER	SSBP2	101088719	transcript	XM_011284323.3	protein_coding	5	c.373-8932_373-8930delATA
chrA1	147457450	ATAT	A	PASS	A	intron_variant	MODIFIER	SSBP2	101088719	transcript	XM_011284330.2	protein_coding	4	c.283-8932_283-8930delATA
chrA1	147457450	ATAT	A	PASS	A	intron_variant	MODIFIER	SSBP2	101088719	transcript	XM_011284326.3	protein_coding	4	c.283-8932_283-8930delATA
chrA1	147457450	ATAT	A	PASS	A	intron_variant	MODIFIER	SSBP2	101088719	transcript	XM_019836180.1	protein_coding	5	c.352-8932_352-8930delATA
chrA1	147457757	C	A	PASS	A	intron_variant	MODIFIER	SSBP2	101088719	transcript	XM_011284322.2	protein_coding	5	c.373-9236G>T
chrA1	147457757	C	A	PASS	A	intron_variant	MODIFIER	SSBP2	101088719	transcript	XM_011284323.3	protein_coding	5	c.373-9236G>T
chrA1	147457757	C	A	PASS	A	intron_variant	MODIFIER	SSBP2	101088719	transcript	XM_011284330.2	protein_coding	4	c.283-9236G>T
chrA1	147457757	C	A	PASS	A	intron_variant	MODIFIER	SSBP2	101088719	transcript	XM_011284326.3	protein_coding	4	c.283-9236G>T
chrA1	147457757	C	A	PASS	A	intron_variant	MODIFIER	SSBP2	101088719	transcript	XM_019836180.1	protein_coding	5	c.352-9236G>T
chrA1	147460081	A	G	PASS	G	intron_variant	MODIFIER	SSBP2	101088719	transcript	XM_011284322.2	protein_coding	5	c.372+9797T>C
chrA1	147460081	A	G	PASS	G	intron_variant	MODIFIER	SSBP2	101088719	transcript	XM_011284323.3	protein_coding	5	c.372+9797T>C
chrA1	147460081	A	G	PASS	G	intron_variant	MODIFIER	SSBP2	101088719	transcript	XM_011284330.2	protein_coding	4	c.283-11560T>C
chrA1	147460081	A	G	PASS	G	intron_variant	MODIFIER	SSBP2	101088719	transcript	XM_011284326.3	protein_coding	4	c.283-11560T>C
chrA1	147460081	A	G	PASS	G	intron_variant	MODIFIER	SSBP2	101088719	transcript	XM_019836180.1	protein_coding	5	c.351+9797T>C
chrA1	147461569	A	G	PASS	G	intron_variant	MODIFIER	SSBP2	101088719	transcript	XM_011284322.2	protein_coding	5	c.372+8309T>C
chrA1	147461569	A	G	PASS	G	intron_variant	MODIFIER	SSBP2	101088719	transcript	XM_011284323.3	protein_coding	5	c.372+8309T>C
chrA1	147461569	A	G	PASS	G	intron_variant	MODIFIER	SSBP2	101088719	transcript	XM_011284330.2	protein_coding	4	c.283-13048T>C
chrA1	147461569	A	G	PASS	G	intron_variant	MODIFIER	SSBP2	101088719	transcript	XM_011284326.3	protein_coding	4	c.283-13048T>C
chrA1	147461569	A	G	PASS	G	intron_variant	MODIFIER	SSBP2	101088719	transcript	XM_019836180.1	protein_coding	5	c.351+8309T>C
chrA1	147462572	C	CCA	PASS	CCA	intron_variant	MODIFIER	SSBP2	101088719	transcript	XM_011284322.2	protein_coding	5	c.372+7305_372+7306insTG
chrA1	147462572	C	CCA	PASS	CCA	intron_variant	MODIFIER	SSBP2	101088719	transcript	XM_011284323.3	protein_coding	5	c.372+7305_372+7306insTG
chrA1	147462572	C	CCA	PASS	CCA	intron_variant	MODIFIER	SSBP2	101088719	transcript	XM_011284330.2	protein_coding	4	c.283-14052_283-14051insTG
chrA1	147462572	C	CCA	PASS	CCA	intron_variant	MODIFIER	SSBP2	101088719	transcript	XM_011284326.3	protein_coding	4	c.283-14052_283-14051insTG
chrA1	147462572	C	CCA	PASS	CCA	intron_variant	MODIFIER	SSBP2	101088719	transcript	XM_019836180.1	protein_coding	5	c.351+7305_351+7306insTG
chrA1	147463275	C	T	PASS	T	intron_variant	MODIFIER	SSBP2	101088719	transcript	XM_011284322.2	protein_coding	5	c.372+6603G>A
chrA1	147463275	C	T	PASS	T	intron_variant	MODIFIER	SSBP2	101088719	transcript	XM_011284323.3	protein_coding	5	c.372+6603G>A
chrA1	147463275	C	T	PASS	T	intron_variant	MODIFIER	SSBP2	101088719	transcript	XM_011284330.2	protein_coding	4	c.283-14754G>A
chrA1	147463275	C	T	PASS	T	intron_variant	MODIFIER	SSBP2	101088719	transcript	XM_011284326.3	protein_coding	4	c.283-14754G>A
chrA1	147463275	C	T	PASS	T	intron_variant	MODIFIER	SSBP2	101088719	transcript	XM_019836180.1	protein_coding	5	c.351+6603G>A
chrA1	147465599	G	A	PASS	A	intron_variant	MODIFIER	SSBP2	101088719	transcript	XM_011284322.2	protein_coding	5	c.372+4279C>T
chrA1	147465599	G	A	PASS	A	intron_variant	MODIFIER	SSBP2	101088719	transcript	XM_011284323.3	protein_coding	5	c.372+4279C>T
chrA1	147465599	G	A	PASS	A	intron_variant	MODIFIER	SSBP2	101088719	transcript	XM_011284330.2	protein_coding	4	c.283-17078C>T
chrA1	147465599	G	A	PASS	A	intron_variant	MODIFIER	SSBP2	101088719	transcript	XM_011284326.3	protein_coding	4	c.283-17078C>T
chrA1	147465599	G	A	PASS	A	intron_variant	MODIFIER	SSBP2	101088719	transcript	XM_019836180.1	protein_coding	5	c.351+4279C>T
chrA1	147465723	CTG	C	PASS	C	intron_variant	MODIFIER	SSBP2	101088719	transcript	XM_011284322.2	protein_coding	5	c.372+4153_372+4154delCA
chrA1	147465723	CTG	C	PASS	C	intron_variant	MODIFIER	SSBP2	101088719	transcript	XM_011284323.3	protein_coding	5	c.372+4153_372+4154delCA
chrA1	147465723	CTG	C	PASS	C	intron_variant	MODIFIER	SSBP2	101088719	transcript	XM_011284330.2	protein_coding	4	c.283-17204_283-17203delCA
chrA1	147465723	CTG	C	PASS	C	intron_variant	MODIFIER	SSBP2	101088719	transcript	XM_011284326.3	protein_coding	4	c.283-17204_283-17203delCA
chrA1	147465723	CTG	C	PASS	C	intron_variant	MODIFIER	SSBP2	101088719	transcript	XM_019836180.1	protein_coding	5	c.351+4153_351+4154delCA
chrA1	147465800	T	A	PASS	A	intron_variant	MODIFIER	SSBP2	101088719	transcript	XM_011284322.2	protein_coding	5	c.372+4078A>T
chrA1	147465800	T	A	PASS	A	intron_variant	MODIFIER	SSBP2	101088719	transcript	XM_011284323.3	protein_coding	5	c.372+4078A>T
chrA1	147465800	T	A	PASS	A	intron_variant	MODIFIER	SSBP2	101088719	transcript	XM_011284330.2	protein_coding	4	c.283-17279A>T
chrA1	147465800	T	A	PASS	A	intron_variant	MODIFIER	SSBP2	101088719	transcript	XM_011284326.3	protein_coding	4	c.283-17279A>T
chrA1	147465800	T	A	PASS	A	intron_variant	MODIFIER	SSBP2	101088719	transcript	XM_019836180.1	protein_coding	5	c.351+4078A>T
chrA1	147467556	C	CT	PASS	CT	intron_variant	MODIFIER	SSBP2	101088719	transcript	XM_011284322.2	protein_coding	5	c.372+2321_372+2322insA
chrA1	147467556	C	CT	PASS	CT	intron_variant	MODIFIER	SSBP2	101088719	transcript	XM_011284323.3	protein_coding	5	c.372+2321_372+2322insA
chrA1	147467556	C	CT	PASS	CT	intron_variant	MODIFIER	SSBP2	101088719	transcript	XM_011284330.2	protein_coding	4	c.283-19036_283-19035insA
chrA1	147467556	C	CT	PASS	CT	intron_variant	MODIFIER	SSBP2	101088719	transcript	XM_011284326.3	protein_coding	4	c.283-19036_283-19035insA
chrA1	147467556	C	CT	PASS	CT	intron_variant	MODIFIER	SSBP2	101088719	transcript	XM_019836180.1	protein_coding	5	c.351+2321_351+2322insA
chrA1	147467857	C	T	PASS	T	intron_variant	MODIFIER	SSBP2	101088719	transcript	XM_011284322.2	protein_coding	5	c.372+2021G>A
chrA1	147467857	C	T	PASS	T	intron_variant	MODIFIER	SSBP2	101088719	transcript	XM_011284323.3	protein_coding	5	c.372+2021G>A
chrA1	147467857	C	T	PASS	T	intron_variant	MODIFIER	SSBP2	101088719	transcript	XM_011284330.2	protein_coding	4	c.283-19336G>A
chrA1	147467857	C	T	PASS	T	intron_variant	MODIFIER	SSBP2	101088719	transcript	XM_011284326.3	protein_coding	4	c.283-19336G>A
chrA1	147467857	C	T	PASS	T	intron_variant	MODIFIER	SSBP2	101088719	transcript	XM_019836180.1	protein_coding	5	c.351+2021G>A
chrA1	147470297	A	C	PASS	C	intron_variant	MODIFIER	SSBP2	101088719	transcript	XM_011284322.2	protein_coding	4	c.283-330T>G
chrA1	147470297	A	C	PASS	C	intron_variant	MODIFIER	SSBP2	101088719	transcript	XM_011284323.3	protein_coding	4	c.283-330T>G
chrA1	147470297	A	C	PASS	C	intron_variant	MODIFIER	SSBP2	101088719	transcript	XM_011284330.2	protein_coding	4	c.283-21776T>G
chrA1	147470297	A	C	PASS	C	intron_variant	MODIFIER	SSBP2	101088719	transcript	XM_011284326.3	protein_coding	4	c.283-21776T>G
chrA1	147470297	A	C	PASS	C	intron_variant	MODIFIER	SSBP2	101088719	transcript	XM_019836180.1	protein_coding	4	c.262-330T>G
chrA1	147471637	GATGA	G	PASS	G	intron_variant	MODIFIER	SSBP2	101088719	transcript	XM_011284322.2	protein_coding	4	c.283-1674_283-1671delTCAT
chrA1	147471637	GATGA	G	PASS	G	intron_variant	MODIFIER	SSBP2	101088719	transcript	XM_011284323.3	protein_coding	4	c.283-1674_283-1671delTCAT
chrA1	147471637	GATGA	G	PASS	G	intron_variant	MODIFIER	SSBP2	101088719	transcript	XM_011284330.2	protein_coding	4	c.283-23120_283-23117delTCAT
chrA1	147471637	GATGA	G	PASS	G	intron_variant	MODIFIER	SSBP2	101088719	transcript	XM_011284326.3	protein_coding	4	c.283-23120_283-23117delTCAT
chrA1	147471637	GATGA	G	PASS	G	intron_variant	MODIFIER	SSBP2	101088719	transcript	XM_019836180.1	protein_coding	4	c.262-1674_262-1671delTCAT
chrA1	147474623	A	G	PASS	G	intron_variant	MODIFIER	SSBP2	101088719	transcript	XM_011284322.2	protein_coding	4	c.283-4656T>C
chrA1	147474623	A	G	PASS	G	intron_variant	MODIFIER	SSBP2	101088719	transcript	XM_011284323.3	protein_coding	4	c.283-4656T>C
chrA1	147474623	A	G	PASS	G	intron_variant	MODIFIER	SSBP2	101088719	transcript	XM_011284330.2	protein_coding	4	c.283-26102T>C
chrA1	147474623	A	G	PASS	G	intron_variant	MODIFIER	SSBP2	101088719	transcript	XM_011284326.3	protein_coding	4	c.283-26102T>C
chrA1	147474623	A	G	PASS	G	intron_variant	MODIFIER	SSBP2	101088719	transcript	XM_019836180.1	protein_coding	4	c.262-4656T>C
chrA1	147474739	A	G	PASS	G	intron_variant	MODIFIER	SSBP2	101088719	transcript	XM_011284322.2	protein_coding	4	c.283-4772T>C
chrA1	147474739	A	G	PASS	G	intron_variant	MODIFIER	SSBP2	101088719	transcript	XM_011284323.3	protein_coding	4	c.283-4772T>C
chrA1	147474739	A	G	PASS	G	intron_variant	MODIFIER	SSBP2	101088719	transcript	XM_011284330.2	protein_coding	4	c.283-26218T>C
chrA1	147474739	A	G	PASS	G	intron_variant	MODIFIER	SSBP2	101088719	transcript	XM_011284326.3	protein_coding	4	c.283-26218T>C
chrA1	147474739	A	G	PASS	G	intron_variant	MODIFIER	SSBP2	101088719	transcript	XM_019836180.1	protein_coding	4	c.262-4772T>C
chrA1	147475659	C	T	PASS	T	intron_variant	MODIFIER	SSBP2	101088719	transcript	XM_011284322.2	protein_coding	4	c.283-5692G>A
chrA1	147475659	C	T	PASS	T	intron_variant	MODIFIER	SSBP2	101088719	transcript	XM_011284323.3	protein_coding	4	c.283-5692G>A
chrA1	147475659	C	T	PASS	T	intron_variant	MODIFIER	SSBP2	101088719	transcript	XM_011284330.2	protein_coding	4	c.283-27138G>A
chrA1	147475659	C	T	PASS	T	intron_variant	MODIFIER	SSBP2	101088719	transcript	XM_011284326.3	protein_coding	4	c.283-27138G>A
chrA1	147475659	C	T	PASS	T	intron_variant	MODIFIER	SSBP2	101088719	transcript	XM_019836180.1	protein_coding	4	c.262-5692G>A
chrA1	147476947	T	G	PASS	G	intron_variant	MODIFIER	SSBP2	101088719	transcript	XM_011284322.2	protein_coding	4	c.283-6980A>C
chrA1	147476947	T	G	PASS	G	intron_variant	MODIFIER	SSBP2	101088719	transcript	XM_011284323.3	protein_coding	4	c.283-6980A>C
chrA1	147476947	T	G	PASS	G	intron_variant	MODIFIER	SSBP2	101088719	transcript	XM_011284330.2	protein_coding	4	c.283-28426A>C
chrA1	147476947	T	G	PASS	G	intron_variant	MODIFIER	SSBP2	101088719	transcript	XM_011284326.3	protein_coding	4	c.283-28426A>C
chrA1	147476947	T	G	PASS	G	intron_variant	MODIFIER	SSBP2	101088719	transcript	XM_019836180.1	protein_coding	4	c.262-6980A>C
chrA1	147476998	C	CT	PASS	CT	intron_variant	MODIFIER	SSBP2	101088719	transcript	XM_011284322.2	protein_coding	4	c.283-7032_283-7031insA
chrA1	147476998	C	CT	PASS	CT	intron_variant	MODIFIER	SSBP2	101088719	transcript	XM_011284323.3	protein_coding	4	c.283-7032_283-7031insA
chrA1	147476998	C	CT	PASS	CT	intron_variant	MODIFIER	SSBP2	101088719	transcript	XM_011284330.2	protein_coding	4	c.283-28478_283-28477insA
chrA1	147476998	C	CT	PASS	CT	intron_variant	MODIFIER	SSBP2	101088719	transcript	XM_011284326.3	protein_coding	4	c.283-28478_283-28477insA
chrA1	147476998	C	CT	PASS	CT	intron_variant	MODIFIER	SSBP2	101088719	transcript	XM_019836180.1	protein_coding	4	c.262-7032_262-7031insA
chrA1	147482458	T	C	PASS	C	intron_variant	MODIFIER	SSBP2	101088719	transcript	XM_011284322.2	protein_coding	4	c.283-12491A>G
chrA1	147482458	T	C	PASS	C	intron_variant	MODIFIER	SSBP2	101088719	transcript	XM_011284323.3	protein_coding	4	c.283-12491A>G
chrA1	147482458	T	C	PASS	C	intron_variant	MODIFIER	SSBP2	101088719	transcript	XM_011284330.2	protein_coding	4	c.283-33937A>G
chrA1	147482458	T	C	PASS	C	intron_variant	MODIFIER	SSBP2	101088719	transcript	XM_011284326.3	protein_coding	4	c.283-33937A>G
chrA1	147482458	T	C	PASS	C	intron_variant	MODIFIER	SSBP2	101088719	transcript	XM_019836180.1	protein_coding	4	c.262-12491A>G
chrA1	147482483	G	A	PASS	A	intron_variant	MODIFIER	SSBP2	101088719	transcript	XM_011284322.2	protein_coding	4	c.283-12516C>T
chrA1	147482483	G	A	PASS	A	intron_variant	MODIFIER	SSBP2	101088719	transcript	XM_011284323.3	protein_coding	4	c.283-12516C>T
chrA1	147482483	G	A	PASS	A	intron_variant	MODIFIER	SSBP2	101088719	transcript	XM_011284330.2	protein_coding	4	c.283-33962C>T
chrA1	147482483	G	A	PASS	A	intron_variant	MODIFIER	SSBP2	101088719	transcript	XM_011284326.3	protein_coding	4	c.283-33962C>T
chrA1	147482483	G	A	PASS	A	intron_variant	MODIFIER	SSBP2	101088719	transcript	XM_019836180.1	protein_coding	4	c.262-12516C>T
chrA1	147483836	TA	T	PASS	T	intron_variant	MODIFIER	SSBP2	101088719	transcript	XM_011284322.2	protein_coding	4	c.283-13870delT
chrA1	147483836	TA	T	PASS	T	intron_variant	MODIFIER	SSBP2	101088719	transcript	XM_011284323.3	protein_coding	4	c.283-13870delT
chrA1	147483836	TA	T	PASS	T	intron_variant	MODIFIER	SSBP2	101088719	transcript	XM_011284330.2	protein_coding	4	c.283-35316delT
chrA1	147483836	TA	T	PASS	T	intron_variant	MODIFIER	SSBP2	101088719	transcript	XM_011284326.3	protein_coding	4	c.283-35316delT
chrA1	147483836	TA	T	PASS	T	intron_variant	MODIFIER	SSBP2	101088719	transcript	XM_019836180.1	protein_coding	4	c.262-13870delT
chrA1	147483943	G	C	PASS	C	intron_variant	MODIFIER	SSBP2	101088719	transcript	XM_011284322.2	protein_coding	4	c.283-13976C>G
chrA1	147483943	G	C	PASS	C	intron_variant	MODIFIER	SSBP2	101088719	transcript	XM_011284323.3	protein_coding	4	c.283-13976C>G
chrA1	147483943	G	C	PASS	C	intron_variant	MODIFIER	SSBP2	101088719	transcript	XM_011284330.2	protein_coding	4	c.283-35422C>G
chrA1	147483943	G	C	PASS	C	intron_variant	MODIFIER	SSBP2	101088719	transcript	XM_011284326.3	protein_coding	4	c.283-35422C>G
chrA1	147483943	G	C	PASS	C	intron_variant	MODIFIER	SSBP2	101088719	transcript	XM_019836180.1	protein_coding	4	c.262-13976C>G
chrA1	147484730	C	T	PASS	T	intron_variant	MODIFIER	SSBP2	101088719	transcript	XM_011284322.2	protein_coding	4	c.283-14763G>A
chrA1	147484730	C	T	PASS	T	intron_variant	MODIFIER	SSBP2	101088719	transcript	XM_011284323.3	protein_coding	4	c.283-14763G>A
chrA1	147484730	C	T	PASS	T	intron_variant	MODIFIER	SSBP2	101088719	transcript	XM_011284330.2	protein_coding	4	c.283-36209G>A
chrA1	147484730	C	T	PASS	T	intron_variant	MODIFIER	SSBP2	101088719	transcript	XM_011284326.3	protein_coding	4	c.283-36209G>A
chrA1	147484730	C	T	PASS	T	intron_variant	MODIFIER	SSBP2	101088719	transcript	XM_019836180.1	protein_coding	4	c.262-14763G>A
chrA1	147485491	G	A	PASS	A	intron_variant	MODIFIER	SSBP2	101088719	transcript	XM_011284322.2	protein_coding	4	c.283-15524C>T
chrA1	147485491	G	A	PASS	A	intron_variant	MODIFIER	SSBP2	101088719	transcript	XM_011284323.3	protein_coding	4	c.283-15524C>T
chrA1	147485491	G	A	PASS	A	intron_variant	MODIFIER	SSBP2	101088719	transcript	XM_011284330.2	protein_coding	4	c.283-36970C>T
chrA1	147485491	G	A	PASS	A	intron_variant	MODIFIER	SSBP2	101088719	transcript	XM_011284326.3	protein_coding	4	c.283-36970C>T
chrA1	147485491	G	A	PASS	A	intron_variant	MODIFIER	SSBP2	101088719	transcript	XM_019836180.1	protein_coding	4	c.262-15524C>T
chrA1	147486311	G	A	PASS	A	intron_variant	MODIFIER	SSBP2	101088719	transcript	XM_011284322.2	protein_coding	4	c.283-16344C>T
chrA1	147486311	G	A	PASS	A	intron_variant	MODIFIER	SSBP2	101088719	transcript	XM_011284323.3	protein_coding	4	c.283-16344C>T
chrA1	147486311	G	A	PASS	A	intron_variant	MODIFIER	SSBP2	101088719	transcript	XM_011284330.2	protein_coding	4	c.283-37790C>T
chrA1	147486311	G	A	PASS	A	intron_variant	MODIFIER	SSBP2	101088719	transcript	XM_011284326.3	protein_coding	4	c.283-37790C>T
chrA1	147486311	G	A	PASS	A	intron_variant	MODIFIER	SSBP2	101088719	transcript	XM_019836180.1	protein_coding	4	c.262-16344C>T
chrA1	147486343	G	A	PASS	A	intron_variant	MODIFIER	SSBP2	101088719	transcript	XM_011284322.2	protein_coding	4	c.283-16376C>T
chrA1	147486343	G	A	PASS	A	intron_variant	MODIFIER	SSBP2	101088719	transcript	XM_011284323.3	protein_coding	4	c.283-16376C>T
chrA1	147486343	G	A	PASS	A	intron_variant	MODIFIER	SSBP2	101088719	transcript	XM_011284330.2	protein_coding	4	c.283-37822C>T
chrA1	147486343	G	A	PASS	A	intron_variant	MODIFIER	SSBP2	101088719	transcript	XM_011284326.3	protein_coding	4	c.283-37822C>T
chrA1	147486343	G	A	PASS	A	intron_variant	MODIFIER	SSBP2	101088719	transcript	XM_019836180.1	protein_coding	4	c.262-16376C>T
chrA1	147487134	TATTTATTTATTCATTCATTCATTC	T	PASS	T	intron_variant	MODIFIER	SSBP2	101088719	transcript	XM_011284322.2	protein_coding	4	c.283-17191_283-17168delGAATGAATGAATGAATAAATAAAT
chrA1	147487134	TATTTATTTATTCATTCATTCATTC	T	PASS	T	intron_variant	MODIFIER	SSBP2	101088719	transcript	XM_011284323.3	protein_coding	4	c.283-17191_283-17168delGAATGAATGAATGAATAAATAAAT
chrA1	147487134	TATTTATTTATTCATTCATTCATTC	T	PASS	T	intron_variant	MODIFIER	SSBP2	101088719	transcript	XM_011284330.2	protein_coding	4	c.283-38637_283-38614delGAATGAATGAATGAATAAATAAAT
chrA1	147487134	TATTTATTTATTCATTCATTCATTC	T	PASS	T	intron_variant	MODIFIER	SSBP2	101088719	transcript	XM_011284326.3	protein_coding	4	c.283-38637_283-38614delGAATGAATGAATGAATAAATAAAT
chrA1	147487134	TATTTATTTATTCATTCATTCATTC	T	PASS	T	intron_variant	MODIFIER	SSBP2	101088719	transcript	XM_019836180.1	protein_coding	4	c.262-17191_262-17168delGAATGAATGAATGAATAAATAAAT
chrA1	147487599	T	C	PASS	C	intron_variant	MODIFIER	SSBP2	101088719	transcript	XM_011284322.2	protein_coding	4	c.283-17632A>G
chrA1	147487599	T	C	PASS	C	intron_variant	MODIFIER	SSBP2	101088719	transcript	XM_011284323.3	protein_coding	4	c.283-17632A>G
chrA1	147487599	T	C	PASS	C	intron_variant	MODIFIER	SSBP2	101088719	transcript	XM_011284330.2	protein_coding	4	c.283-39078A>G
chrA1	147487599	T	C	PASS	C	intron_variant	MODIFIER	SSBP2	101088719	transcript	XM_011284326.3	protein_coding	4	c.283-39078A>G
chrA1	147487599	T	C	PASS	C	intron_variant	MODIFIER	SSBP2	101088719	transcript	XM_019836180.1	protein_coding	4	c.262-17632A>G
chrA1	147491261	G	A	PASS	A	intron_variant	MODIFIER	SSBP2	101088719	transcript	XM_011284322.2	protein_coding	4	c.283-21294C>T
chrA1	147491261	G	A	PASS	A	intron_variant	MODIFIER	SSBP2	101088719	transcript	XM_011284323.3	protein_coding	4	c.283-21294C>T
chrA1	147491261	G	A	PASS	A	intron_variant	MODIFIER	SSBP2	101088719	transcript	XM_011284330.2	protein_coding	4	c.283-42740C>T
chrA1	147491261	G	A	PASS	A	intron_variant	MODIFIER	SSBP2	101088719	transcript	XM_011284326.3	protein_coding	4	c.283-42740C>T
chrA1	147491261	G	A	PASS	A	intron_variant	MODIFIER	SSBP2	101088719	transcript	XM_019836180.1	protein_coding	4	c.262-21294C>T
chrA1	147491916	C	A	PASS	A	intron_variant	MODIFIER	SSBP2	101088719	transcript	XM_011284322.2	protein_coding	4	c.283-21949G>T
chrA1	147491916	C	A	PASS	A	intron_variant	MODIFIER	SSBP2	101088719	transcript	XM_011284323.3	protein_coding	4	c.283-21949G>T
chrA1	147491916	C	A	PASS	A	intron_variant	MODIFIER	SSBP2	101088719	transcript	XM_011284330.2	protein_coding	4	c.283-43395G>T
chrA1	147491916	C	A	PASS	A	intron_variant	MODIFIER	SSBP2	101088719	transcript	XM_011284326.3	protein_coding	4	c.283-43395G>T
chrA1	147491916	C	A	PASS	A	intron_variant	MODIFIER	SSBP2	101088719	transcript	XM_019836180.1	protein_coding	4	c.262-21949G>T
chrA1	147492806	T	C	PASS	C	intron_variant	MODIFIER	SSBP2	101088719	transcript	XM_011284322.2	protein_coding	4	c.283-22839A>G
chrA1	147492806	T	C	PASS	C	intron_variant	MODIFIER	SSBP2	101088719	transcript	XM_011284323.3	protein_coding	4	c.283-22839A>G
chrA1	147492806	T	C	PASS	C	intron_variant	MODIFIER	SSBP2	101088719	transcript	XM_011284330.2	protein_coding	4	c.283-44285A>G
chrA1	147492806	T	C	PASS	C	intron_variant	MODIFIER	SSBP2	101088719	transcript	XM_011284326.3	protein_coding	4	c.283-44285A>G
chrA1	147492806	T	C	PASS	C	intron_variant	MODIFIER	SSBP2	101088719	transcript	XM_019836180.1	protein_coding	4	c.262-22839A>G
chrA1	147494334	A	AT	PASS	AT	intron_variant	MODIFIER	SSBP2	101088719	transcript	XM_011284322.2	protein_coding	4	c.283-24368_283-24367insA
chrA1	147494334	A	AT	PASS	AT	intron_variant	MODIFIER	SSBP2	101088719	transcript	XM_011284323.3	protein_coding	4	c.283-24368_283-24367insA
chrA1	147494334	A	AT	PASS	AT	intron_variant	MODIFIER	SSBP2	101088719	transcript	XM_011284330.2	protein_coding	4	c.283-45814_283-45813insA
chrA1	147494334	A	AT	PASS	AT	intron_variant	MODIFIER	SSBP2	101088719	transcript	XM_011284326.3	protein_coding	4	c.283-45814_283-45813insA
chrA1	147494334	A	AT	PASS	AT	intron_variant	MODIFIER	SSBP2	101088719	transcript	XM_019836180.1	protein_coding	4	c.262-24368_262-24367insA
chrA1	147497429	G	T	PASS	T	intron_variant	MODIFIER	SSBP2	101088719	transcript	XM_011284322.2	protein_coding	4	c.283-27462C>A
chrA1	147497429	G	T	PASS	T	intron_variant	MODIFIER	SSBP2	101088719	transcript	XM_011284323.3	protein_coding	4	c.283-27462C>A
chrA1	147497429	G	T	PASS	T	intron_variant	MODIFIER	SSBP2	101088719	transcript	XM_011284330.2	protein_coding	4	c.283-48908C>A
chrA1	147497429	G	T	PASS	T	intron_variant	MODIFIER	SSBP2	101088719	transcript	XM_011284326.3	protein_coding	4	c.283-48908C>A
chrA1	147497429	G	T	PASS	T	intron_variant	MODIFIER	SSBP2	101088719	transcript	XM_019836180.1	protein_coding	4	c.262-27462C>A
chrA1	147499083	T	C	PASS	C	intron_variant	MODIFIER	SSBP2	101088719	transcript	XM_011284322.2	protein_coding	4	c.283-29116A>G
chrA1	147499083	T	C	PASS	C	intron_variant	MODIFIER	SSBP2	101088719	transcript	XM_011284323.3	protein_coding	4	c.283-29116A>G
chrA1	147499083	T	C	PASS	C	intron_variant	MODIFIER	SSBP2	101088719	transcript	XM_011284330.2	protein_coding	4	c.283-50562A>G
chrA1	147499083	T	C	PASS	C	intron_variant	MODIFIER	SSBP2	101088719	transcript	XM_011284326.3	protein_coding	4	c.283-50562A>G
chrA1	147499083	T	C	PASS	C	intron_variant	MODIFIER	SSBP2	101088719	transcript	XM_019836180.1	protein_coding	4	c.262-29116A>G
chrA1	147499542	C	CCT	PASS	CCT	intron_variant	MODIFIER	SSBP2	101088719	transcript	XM_011284322.2	protein_coding	4	c.283-29576_283-29575insAG
chrA1	147499542	C	CCT	PASS	CCT	intron_variant	MODIFIER	SSBP2	101088719	transcript	XM_011284323.3	protein_coding	4	c.283-29576_283-29575insAG
chrA1	147499542	C	CCT	PASS	CCT	intron_variant	MODIFIER	SSBP2	101088719	transcript	XM_011284330.2	protein_coding	4	c.283-51022_283-51021insAG
chrA1	147499542	C	CCT	PASS	CCT	intron_variant	MODIFIER	SSBP2	101088719	transcript	XM_011284326.3	protein_coding	4	c.283-51022_283-51021insAG
chrA1	147499542	C	CCT	PASS	CCT	intron_variant	MODIFIER	SSBP2	101088719	transcript	XM_019836180.1	protein_coding	4	c.262-29576_262-29575insAG
chrA1	147500388	T	G	PASS	G	intron_variant	MODIFIER	SSBP2	101088719	transcript	XM_011284322.2	protein_coding	4	c.283-30421A>C
chrA1	147500388	T	G	PASS	G	intron_variant	MODIFIER	SSBP2	101088719	transcript	XM_011284323.3	protein_coding	4	c.283-30421A>C
chrA1	147500388	T	G	PASS	G	intron_variant	MODIFIER	SSBP2	101088719	transcript	XM_011284330.2	protein_coding	4	c.283-51867A>C
chrA1	147500388	T	G	PASS	G	intron_variant	MODIFIER	SSBP2	101088719	transcript	XM_011284326.3	protein_coding	4	c.283-51867A>C
chrA1	147500388	T	G	PASS	G	intron_variant	MODIFIER	SSBP2	101088719	transcript	XM_019836180.1	protein_coding	4	c.262-30421A>C
chrA1	147500543	T	G	PASS	G	intron_variant	MODIFIER	SSBP2	101088719	transcript	XM_011284322.2	protein_coding	4	c.283-30576A>C
chrA1	147500543	T	G	PASS	G	intron_variant	MODIFIER	SSBP2	101088719	transcript	XM_011284323.3	protein_coding	4	c.283-30576A>C
chrA1	147500543	T	G	PASS	G	intron_variant	MODIFIER	SSBP2	101088719	transcript	XM_011284330.2	protein_coding	4	c.283-52022A>C
chrA1	147500543	T	G	PASS	G	intron_variant	MODIFIER	SSBP2	101088719	transcript	XM_011284326.3	protein_coding	4	c.283-52022A>C
chrA1	147500543	T	G	PASS	G	intron_variant	MODIFIER	SSBP2	101088719	transcript	XM_019836180.1	protein_coding	4	c.262-30576A>C
chrA1	147500993	TC	T	PASS	T	intron_variant	MODIFIER	SSBP2	101088719	transcript	XM_011284322.2	protein_coding	4	c.283-31027delG
chrA1	147500993	TC	T	PASS	T	intron_variant	MODIFIER	SSBP2	101088719	transcript	XM_011284323.3	protein_coding	4	c.283-31027delG
chrA1	147500993	TC	T	PASS	T	intron_variant	MODIFIER	SSBP2	101088719	transcript	XM_011284330.2	protein_coding	4	c.283-52473delG
chrA1	147500993	TC	T	PASS	T	intron_variant	MODIFIER	SSBP2	101088719	transcript	XM_011284326.3	protein_coding	4	c.283-52473delG
chrA1	147500993	TC	T	PASS	T	intron_variant	MODIFIER	SSBP2	101088719	transcript	XM_019836180.1	protein_coding	4	c.262-31027delG
chrA1	147501210	A	G	PASS	G	intron_variant	MODIFIER	SSBP2	101088719	transcript	XM_011284322.2	protein_coding	4	c.283-31243T>C
chrA1	147501210	A	G	PASS	G	intron_variant	MODIFIER	SSBP2	101088719	transcript	XM_011284323.3	protein_coding	4	c.283-31243T>C
chrA1	147501210	A	G	PASS	G	intron_variant	MODIFIER	SSBP2	101088719	transcript	XM_011284330.2	protein_coding	4	c.283-52689T>C
chrA1	147501210	A	G	PASS	G	intron_variant	MODIFIER	SSBP2	101088719	transcript	XM_011284326.3	protein_coding	4	c.283-52689T>C
chrA1	147501210	A	G	PASS	G	intron_variant	MODIFIER	SSBP2	101088719	transcript	XM_019836180.1	protein_coding	4	c.262-31243T>C
chrA1	147503225	T	A	PASS	A	intron_variant	MODIFIER	SSBP2	101088719	transcript	XM_011284322.2	protein_coding	4	c.283-33258A>T
chrA1	147503225	T	A	PASS	A	intron_variant	MODIFIER	SSBP2	101088719	transcript	XM_011284323.3	protein_coding	4	c.283-33258A>T
chrA1	147503225	T	A	PASS	A	intron_variant	MODIFIER	SSBP2	101088719	transcript	XM_011284330.2	protein_coding	4	c.283-54704A>T
chrA1	147503225	T	A	PASS	A	intron_variant	MODIFIER	SSBP2	101088719	transcript	XM_011284326.3	protein_coding	4	c.283-54704A>T
chrA1	147503225	T	A	PASS	A	intron_variant	MODIFIER	SSBP2	101088719	transcript	XM_019836180.1	protein_coding	4	c.262-33258A>T
chrA1	147504388	C	T	PASS	T	intron_variant	MODIFIER	SSBP2	101088719	transcript	XM_011284322.2	protein_coding	4	c.283-34421G>A
chrA1	147504388	C	T	PASS	T	intron_variant	MODIFIER	SSBP2	101088719	transcript	XM_011284323.3	protein_coding	4	c.283-34421G>A
chrA1	147504388	C	T	PASS	T	intron_variant	MODIFIER	SSBP2	101088719	transcript	XM_011284330.2	protein_coding	4	c.283-55867G>A
chrA1	147504388	C	T	PASS	T	intron_variant	MODIFIER	SSBP2	101088719	transcript	XM_011284326.3	protein_coding	4	c.283-55867G>A
chrA1	147504388	C	T	PASS	T	intron_variant	MODIFIER	SSBP2	101088719	transcript	XM_019836180.1	protein_coding	4	c.262-34421G>A
chrA1	147504454	T	A	PASS	A	intron_variant	MODIFIER	SSBP2	101088719	transcript	XM_011284322.2	protein_coding	4	c.283-34487A>T
chrA1	147504454	T	A	PASS	A	intron_variant	MODIFIER	SSBP2	101088719	transcript	XM_011284323.3	protein_coding	4	c.283-34487A>T
chrA1	147504454	T	A	PASS	A	intron_variant	MODIFIER	SSBP2	101088719	transcript	XM_011284330.2	protein_coding	4	c.283-55933A>T
chrA1	147504454	T	A	PASS	A	intron_variant	MODIFIER	SSBP2	101088719	transcript	XM_011284326.3	protein_coding	4	c.283-55933A>T
chrA1	147504454	T	A	PASS	A	intron_variant	MODIFIER	SSBP2	101088719	transcript	XM_019836180.1	protein_coding	4	c.262-34487A>T
chrA1	147504794	G	A	PASS	A	intron_variant	MODIFIER	SSBP2	101088719	transcript	XM_011284322.2	protein_coding	4	c.283-34827C>T
chrA1	147504794	G	A	PASS	A	intron_variant	MODIFIER	SSBP2	101088719	transcript	XM_011284323.3	protein_coding	4	c.283-34827C>T
chrA1	147504794	G	A	PASS	A	intron_variant	MODIFIER	SSBP2	101088719	transcript	XM_011284330.2	protein_coding	4	c.283-56273C>T
chrA1	147504794	G	A	PASS	A	intron_variant	MODIFIER	SSBP2	101088719	transcript	XM_011284326.3	protein_coding	4	c.283-56273C>T
chrA1	147504794	G	A	PASS	A	intron_variant	MODIFIER	SSBP2	101088719	transcript	XM_019836180.1	protein_coding	4	c.262-34827C>T
chrA1	147504857	T	C	PASS	C	intron_variant	MODIFIER	SSBP2	101088719	transcript	XM_011284322.2	protein_coding	4	c.283-34890A>G
chrA1	147504857	T	C	PASS	C	intron_variant	MODIFIER	SSBP2	101088719	transcript	XM_011284323.3	protein_coding	4	c.283-34890A>G
chrA1	147504857	T	C	PASS	C	intron_variant	MODIFIER	SSBP2	101088719	transcript	XM_011284330.2	protein_coding	4	c.283-56336A>G
chrA1	147504857	T	C	PASS	C	intron_variant	MODIFIER	SSBP2	101088719	transcript	XM_011284326.3	protein_coding	4	c.283-56336A>G
chrA1	147504857	T	C	PASS	C	intron_variant	MODIFIER	SSBP2	101088719	transcript	XM_019836180.1	protein_coding	4	c.262-34890A>G
chrA1	147506799	T	C	PASS	C	intron_variant	MODIFIER	SSBP2	101088719	transcript	XM_011284322.2	protein_coding	4	c.283-36832A>G
chrA1	147506799	T	C	PASS	C	intron_variant	MODIFIER	SSBP2	101088719	transcript	XM_011284323.3	protein_coding	4	c.283-36832A>G
chrA1	147506799	T	C	PASS	C	intron_variant	MODIFIER	SSBP2	101088719	transcript	XM_011284330.2	protein_coding	4	c.283-58278A>G
chrA1	147506799	T	C	PASS	C	intron_variant	MODIFIER	SSBP2	101088719	transcript	XM_011284326.3	protein_coding	4	c.283-58278A>G
chrA1	147506799	T	C	PASS	C	intron_variant	MODIFIER	SSBP2	101088719	transcript	XM_019836180.1	protein_coding	4	c.262-36832A>G
chrA1	147507266	G	A	PASS	A	intron_variant	MODIFIER	SSBP2	101088719	transcript	XM_011284322.2	protein_coding	4	c.283-37299C>T
chrA1	147507266	G	A	PASS	A	intron_variant	MODIFIER	SSBP2	101088719	transcript	XM_011284323.3	protein_coding	4	c.283-37299C>T
chrA1	147507266	G	A	PASS	A	intron_variant	MODIFIER	SSBP2	101088719	transcript	XM_011284330.2	protein_coding	4	c.283-58745C>T
chrA1	147507266	G	A	PASS	A	intron_variant	MODIFIER	SSBP2	101088719	transcript	XM_011284326.3	protein_coding	4	c.283-58745C>T
chrA1	147507266	G	A	PASS	A	intron_variant	MODIFIER	SSBP2	101088719	transcript	XM_019836180.1	protein_coding	4	c.262-37299C>T
chrA1	147509036	G	A	PASS	A	intron_variant	MODIFIER	SSBP2	101088719	transcript	XM_011284322.2	protein_coding	4	c.283-39069C>T
chrA1	147509036	G	A	PASS	A	intron_variant	MODIFIER	SSBP2	101088719	transcript	XM_011284323.3	protein_coding	4	c.283-39069C>T
chrA1	147509036	G	A	PASS	A	intron_variant	MODIFIER	SSBP2	101088719	transcript	XM_011284330.2	protein_coding	4	c.283-60515C>T
chrA1	147509036	G	A	PASS	A	intron_variant	MODIFIER	SSBP2	101088719	transcript	XM_011284326.3	protein_coding	4	c.283-60515C>T
chrA1	147509036	G	A	PASS	A	intron_variant	MODIFIER	SSBP2	101088719	transcript	XM_019836180.1	protein_coding	4	c.262-39069C>T
chrA1	147509444	G	A	PASS	A	intron_variant	MODIFIER	SSBP2	101088719	transcript	XM_011284322.2	protein_coding	4	c.283-39477C>T
chrA1	147509444	G	A	PASS	A	intron_variant	MODIFIER	SSBP2	101088719	transcript	XM_011284323.3	protein_coding	4	c.283-39477C>T
chrA1	147509444	G	A	PASS	A	intron_variant	MODIFIER	SSBP2	101088719	transcript	XM_011284330.2	protein_coding	4	c.283-60923C>T
chrA1	147509444	G	A	PASS	A	intron_variant	MODIFIER	SSBP2	101088719	transcript	XM_011284326.3	protein_coding	4	c.283-60923C>T
chrA1	147509444	G	A	PASS	A	intron_variant	MODIFIER	SSBP2	101088719	transcript	XM_019836180.1	protein_coding	4	c.262-39477C>T
chrA1	147513880	T	A	PASS	A	intron_variant	MODIFIER	SSBP2	101088719	transcript	XM_011284322.2	protein_coding	4	c.283-43913A>T
chrA1	147513880	T	A	PASS	A	intron_variant	MODIFIER	SSBP2	101088719	transcript	XM_011284323.3	protein_coding	4	c.283-43913A>T
chrA1	147513880	T	A	PASS	A	intron_variant	MODIFIER	SSBP2	101088719	transcript	XM_011284330.2	protein_coding	4	c.282+61212A>T
chrA1	147513880	T	A	PASS	A	intron_variant	MODIFIER	SSBP2	101088719	transcript	XM_011284326.3	protein_coding	4	c.282+61212A>T
chrA1	147513880	T	A	PASS	A	intron_variant	MODIFIER	SSBP2	101088719	transcript	XM_019836180.1	protein_coding	4	c.262-43913A>T
chrA1	147516620	G	C	PASS	C	intron_variant	MODIFIER	SSBP2	101088719	transcript	XM_011284322.2	protein_coding	4	c.283-46653C>G
chrA1	147516620	G	C	PASS	C	intron_variant	MODIFIER	SSBP2	101088719	transcript	XM_011284323.3	protein_coding	4	c.283-46653C>G
chrA1	147516620	G	C	PASS	C	intron_variant	MODIFIER	SSBP2	101088719	transcript	XM_011284330.2	protein_coding	4	c.282+58472C>G
chrA1	147516620	G	C	PASS	C	intron_variant	MODIFIER	SSBP2	101088719	transcript	XM_011284326.3	protein_coding	4	c.282+58472C>G
chrA1	147516620	G	C	PASS	C	intron_variant	MODIFIER	SSBP2	101088719	transcript	XM_019836180.1	protein_coding	4	c.262-46653C>G
chrA1	147516658	C	G	PASS	G	intron_variant	MODIFIER	SSBP2	101088719	transcript	XM_011284322.2	protein_coding	4	c.283-46691G>C
chrA1	147516658	C	G	PASS	G	intron_variant	MODIFIER	SSBP2	101088719	transcript	XM_011284323.3	protein_coding	4	c.283-46691G>C
chrA1	147516658	C	G	PASS	G	intron_variant	MODIFIER	SSBP2	101088719	transcript	XM_011284330.2	protein_coding	4	c.282+58434G>C
chrA1	147516658	C	G	PASS	G	intron_variant	MODIFIER	SSBP2	101088719	transcript	XM_011284326.3	protein_coding	4	c.282+58434G>C
chrA1	147516658	C	G	PASS	G	intron_variant	MODIFIER	SSBP2	101088719	transcript	XM_019836180.1	protein_coding	4	c.262-46691G>C
chrA1	147517184	A	G	PASS	G	intron_variant	MODIFIER	SSBP2	101088719	transcript	XM_011284322.2	protein_coding	4	c.283-47217T>C
chrA1	147517184	A	G	PASS	G	intron_variant	MODIFIER	SSBP2	101088719	transcript	XM_011284323.3	protein_coding	4	c.283-47217T>C
chrA1	147517184	A	G	PASS	G	intron_variant	MODIFIER	SSBP2	101088719	transcript	XM_011284330.2	protein_coding	4	c.282+57908T>C
chrA1	147517184	A	G	PASS	G	intron_variant	MODIFIER	SSBP2	101088719	transcript	XM_011284326.3	protein_coding	4	c.282+57908T>C
chrA1	147517184	A	G	PASS	G	intron_variant	MODIFIER	SSBP2	101088719	transcript	XM_019836180.1	protein_coding	4	c.262-47217T>C
chrA1	147518632	C	T	PASS	T	intron_variant	MODIFIER	SSBP2	101088719	transcript	XM_011284322.2	protein_coding	4	c.283-48665G>A
chrA1	147518632	C	T	PASS	T	intron_variant	MODIFIER	SSBP2	101088719	transcript	XM_011284323.3	protein_coding	4	c.283-48665G>A
chrA1	147518632	C	T	PASS	T	intron_variant	MODIFIER	SSBP2	101088719	transcript	XM_011284330.2	protein_coding	4	c.282+56460G>A
chrA1	147518632	C	T	PASS	T	intron_variant	MODIFIER	SSBP2	101088719	transcript	XM_011284326.3	protein_coding	4	c.282+56460G>A
chrA1	147518632	C	T	PASS	T	intron_variant	MODIFIER	SSBP2	101088719	transcript	XM_019836180.1	protein_coding	4	c.262-48665G>A
chrA1	147518742	C	G	PASS	G	intron_variant	MODIFIER	SSBP2	101088719	transcript	XM_011284322.2	protein_coding	4	c.283-48775G>C
chrA1	147518742	C	G	PASS	G	intron_variant	MODIFIER	SSBP2	101088719	transcript	XM_011284323.3	protein_coding	4	c.283-48775G>C
chrA1	147518742	C	G	PASS	G	intron_variant	MODIFIER	SSBP2	101088719	transcript	XM_011284330.2	protein_coding	4	c.282+56350G>C
chrA1	147518742	C	G	PASS	G	intron_variant	MODIFIER	SSBP2	101088719	transcript	XM_011284326.3	protein_coding	4	c.282+56350G>C
chrA1	147518742	C	G	PASS	G	intron_variant	MODIFIER	SSBP2	101088719	transcript	XM_019836180.1	protein_coding	4	c.262-48775G>C
chrA1	147519813	G	A	PASS	A	intron_variant	MODIFIER	SSBP2	101088719	transcript	XM_011284322.2	protein_coding	4	c.283-49846C>T
chrA1	147519813	G	A	PASS	A	intron_variant	MODIFIER	SSBP2	101088719	transcript	XM_011284323.3	protein_coding	4	c.283-49846C>T
chrA1	147519813	G	A	PASS	A	intron_variant	MODIFIER	SSBP2	101088719	transcript	XM_011284330.2	protein_coding	4	c.282+55279C>T
chrA1	147519813	G	A	PASS	A	intron_variant	MODIFIER	SSBP2	101088719	transcript	XM_011284326.3	protein_coding	4	c.282+55279C>T
chrA1	147519813	G	A	PASS	A	intron_variant	MODIFIER	SSBP2	101088719	transcript	XM_019836180.1	protein_coding	4	c.262-49846C>T
chrA1	147522116	C	G	PASS	G	intron_variant	MODIFIER	SSBP2	101088719	transcript	XM_011284322.2	protein_coding	4	c.283-52149G>C
chrA1	147522116	C	G	PASS	G	intron_variant	MODIFIER	SSBP2	101088719	transcript	XM_011284323.3	protein_coding	4	c.283-52149G>C
chrA1	147522116	C	G	PASS	G	intron_variant	MODIFIER	SSBP2	101088719	transcript	XM_011284330.2	protein_coding	4	c.282+52976G>C
chrA1	147522116	C	G	PASS	G	intron_variant	MODIFIER	SSBP2	101088719	transcript	XM_011284326.3	protein_coding	4	c.282+52976G>C
chrA1	147522116	C	G	PASS	G	intron_variant	MODIFIER	SSBP2	101088719	transcript	XM_019836180.1	protein_coding	4	c.262-52149G>C
chrA1	147524262	G	A	PASS	A	intron_variant	MODIFIER	SSBP2	101088719	transcript	XM_011284322.2	protein_coding	4	c.282+50830C>T
chrA1	147524262	G	A	PASS	A	intron_variant	MODIFIER	SSBP2	101088719	transcript	XM_011284323.3	protein_coding	4	c.282+50830C>T
chrA1	147524262	G	A	PASS	A	intron_variant	MODIFIER	SSBP2	101088719	transcript	XM_011284330.2	protein_coding	4	c.282+50830C>T
chrA1	147524262	G	A	PASS	A	intron_variant	MODIFIER	SSBP2	101088719	transcript	XM_011284326.3	protein_coding	4	c.282+50830C>T
chrA1	147524262	G	A	PASS	A	intron_variant	MODIFIER	SSBP2	101088719	transcript	XM_019836180.1	protein_coding	4	c.261+50830C>T
chrA1	147524803	C	A	PASS	A	intron_variant	MODIFIER	SSBP2	101088719	transcript	XM_011284322.2	protein_coding	4	c.282+50289G>T
chrA1	147524803	C	A	PASS	A	intron_variant	MODIFIER	SSBP2	101088719	transcript	XM_011284323.3	protein_coding	4	c.282+50289G>T
chrA1	147524803	C	A	PASS	A	intron_variant	MODIFIER	SSBP2	101088719	transcript	XM_011284330.2	protein_coding	4	c.282+50289G>T
chrA1	147524803	C	A	PASS	A	intron_variant	MODIFIER	SSBP2	101088719	transcript	XM_011284326.3	protein_coding	4	c.282+50289G>T
chrA1	147524803	C	A	PASS	A	intron_variant	MODIFIER	SSBP2	101088719	transcript	XM_019836180.1	protein_coding	4	c.261+50289G>T
chrA1	147525048	G	A	PASS	A	intron_variant	MODIFIER	SSBP2	101088719	transcript	XM_011284322.2	protein_coding	4	c.282+50044C>T
chrA1	147525048	G	A	PASS	A	intron_variant	MODIFIER	SSBP2	101088719	transcript	XM_011284323.3	protein_coding	4	c.282+50044C>T
chrA1	147525048	G	A	PASS	A	intron_variant	MODIFIER	SSBP2	101088719	transcript	XM_011284330.2	protein_coding	4	c.282+50044C>T
chrA1	147525048	G	A	PASS	A	intron_variant	MODIFIER	SSBP2	101088719	transcript	XM_011284326.3	protein_coding	4	c.282+50044C>T
chrA1	147525048	G	A	PASS	A	intron_variant	MODIFIER	SSBP2	101088719	transcript	XM_019836180.1	protein_coding	4	c.261+50044C>T
chrA1	147526937	T	G	PASS	G	intron_variant	MODIFIER	SSBP2	101088719	transcript	XM_011284322.2	protein_coding	4	c.282+48155A>C
chrA1	147526937	T	G	PASS	G	intron_variant	MODIFIER	SSBP2	101088719	transcript	XM_011284323.3	protein_coding	4	c.282+48155A>C
chrA1	147526937	T	G	PASS	G	intron_variant	MODIFIER	SSBP2	101088719	transcript	XM_011284330.2	protein_coding	4	c.282+48155A>C
chrA1	147526937	T	G	PASS	G	intron_variant	MODIFIER	SSBP2	101088719	transcript	XM_011284326.3	protein_coding	4	c.282+48155A>C
chrA1	147526937	T	G	PASS	G	intron_variant	MODIFIER	SSBP2	101088719	transcript	XM_019836180.1	protein_coding	4	c.261+48155A>C
chrA1	147528088	C	T	PASS	T	intron_variant	MODIFIER	SSBP2	101088719	transcript	XM_011284322.2	protein_coding	4	c.282+47004G>A
chrA1	147528088	C	T	PASS	T	intron_variant	MODIFIER	SSBP2	101088719	transcript	XM_011284323.3	protein_coding	4	c.282+47004G>A
chrA1	147528088	C	T	PASS	T	intron_variant	MODIFIER	SSBP2	101088719	transcript	XM_011284330.2	protein_coding	4	c.282+47004G>A
chrA1	147528088	C	T	PASS	T	intron_variant	MODIFIER	SSBP2	101088719	transcript	XM_011284326.3	protein_coding	4	c.282+47004G>A
chrA1	147528088	C	T	PASS	T	intron_variant	MODIFIER	SSBP2	101088719	transcript	XM_019836180.1	protein_coding	4	c.261+47004G>A
chrA1	147528546	A	G	PASS	G	intron_variant	MODIFIER	SSBP2	101088719	transcript	XM_011284322.2	protein_coding	4	c.282+46546T>C
chrA1	147528546	A	G	PASS	G	intron_variant	MODIFIER	SSBP2	101088719	transcript	XM_011284323.3	protein_coding	4	c.282+46546T>C
chrA1	147528546	A	G	PASS	G	intron_variant	MODIFIER	SSBP2	101088719	transcript	XM_011284330.2	protein_coding	4	c.282+46546T>C
chrA1	147528546	A	G	PASS	G	intron_variant	MODIFIER	SSBP2	101088719	transcript	XM_011284326.3	protein_coding	4	c.282+46546T>C
chrA1	147528546	A	G	PASS	G	intron_variant	MODIFIER	SSBP2	101088719	transcript	XM_019836180.1	protein_coding	4	c.261+46546T>C
chrA1	147530223	A	C	PASS	C	intron_variant	MODIFIER	SSBP2	101088719	transcript	XM_011284322.2	protein_coding	4	c.282+44869T>G
chrA1	147530223	A	C	PASS	C	intron_variant	MODIFIER	SSBP2	101088719	transcript	XM_011284323.3	protein_coding	4	c.282+44869T>G
chrA1	147530223	A	C	PASS	C	intron_variant	MODIFIER	SSBP2	101088719	transcript	XM_011284330.2	protein_coding	4	c.282+44869T>G
chrA1	147530223	A	C	PASS	C	intron_variant	MODIFIER	SSBP2	101088719	transcript	XM_011284326.3	protein_coding	4	c.282+44869T>G
chrA1	147530223	A	C	PASS	C	intron_variant	MODIFIER	SSBP2	101088719	transcript	XM_019836180.1	protein_coding	4	c.261+44869T>G
chrA1	147531150	T	C	PASS	C	intron_variant	MODIFIER	SSBP2	101088719	transcript	XM_011284322.2	protein_coding	4	c.282+43942A>G
chrA1	147531150	T	C	PASS	C	intron_variant	MODIFIER	SSBP2	101088719	transcript	XM_011284323.3	protein_coding	4	c.282+43942A>G
chrA1	147531150	T	C	PASS	C	intron_variant	MODIFIER	SSBP2	101088719	transcript	XM_011284330.2	protein_coding	4	c.282+43942A>G
chrA1	147531150	T	C	PASS	C	intron_variant	MODIFIER	SSBP2	101088719	transcript	XM_011284326.3	protein_coding	4	c.282+43942A>G
chrA1	147531150	T	C	PASS	C	intron_variant	MODIFIER	SSBP2	101088719	transcript	XM_019836180.1	protein_coding	4	c.261+43942A>G
chrA1	147532578	TA	T	PASS	T	intron_variant	MODIFIER	SSBP2	101088719	transcript	XM_011284322.2	protein_coding	4	c.282+42513delT
chrA1	147532578	TA	T	PASS	T	intron_variant	MODIFIER	SSBP2	101088719	transcript	XM_011284323.3	protein_coding	4	c.282+42513delT
chrA1	147532578	TA	T	PASS	T	intron_variant	MODIFIER	SSBP2	101088719	transcript	XM_011284330.2	protein_coding	4	c.282+42513delT
chrA1	147532578	TA	T	PASS	T	intron_variant	MODIFIER	SSBP2	101088719	transcript	XM_011284326.3	protein_coding	4	c.282+42513delT
chrA1	147532578	TA	T	PASS	T	intron_variant	MODIFIER	SSBP2	101088719	transcript	XM_019836180.1	protein_coding	4	c.261+42513delT
chrA1	147532824	G	A	PASS	A	intron_variant	MODIFIER	SSBP2	101088719	transcript	XM_011284322.2	protein_coding	4	c.282+42268C>T
chrA1	147532824	G	A	PASS	A	intron_variant	MODIFIER	SSBP2	101088719	transcript	XM_011284323.3	protein_coding	4	c.282+42268C>T
chrA1	147532824	G	A	PASS	A	intron_variant	MODIFIER	SSBP2	101088719	transcript	XM_011284330.2	protein_coding	4	c.282+42268C>T
chrA1	147532824	G	A	PASS	A	intron_variant	MODIFIER	SSBP2	101088719	transcript	XM_011284326.3	protein_coding	4	c.282+42268C>T
chrA1	147532824	G	A	PASS	A	intron_variant	MODIFIER	SSBP2	101088719	transcript	XM_019836180.1	protein_coding	4	c.261+42268C>T
chrA1	147534426	A	T	PASS	T	intron_variant	MODIFIER	SSBP2	101088719	transcript	XM_011284322.2	protein_coding	4	c.282+40666T>A
chrA1	147534426	A	T	PASS	T	intron_variant	MODIFIER	SSBP2	101088719	transcript	XM_011284323.3	protein_coding	4	c.282+40666T>A
chrA1	147534426	A	T	PASS	T	intron_variant	MODIFIER	SSBP2	101088719	transcript	XM_011284330.2	protein_coding	4	c.282+40666T>A
chrA1	147534426	A	T	PASS	T	intron_variant	MODIFIER	SSBP2	101088719	transcript	XM_011284326.3	protein_coding	4	c.282+40666T>A
chrA1	147534426	A	T	PASS	T	intron_variant	MODIFIER	SSBP2	101088719	transcript	XM_019836180.1	protein_coding	4	c.261+40666T>A
chrA1	147534482	C	T	PASS	T	intron_variant	MODIFIER	SSBP2	101088719	transcript	XM_011284322.2	protein_coding	4	c.282+40610G>A
chrA1	147534482	C	T	PASS	T	intron_variant	MODIFIER	SSBP2	101088719	transcript	XM_011284323.3	protein_coding	4	c.282+40610G>A
chrA1	147534482	C	T	PASS	T	intron_variant	MODIFIER	SSBP2	101088719	transcript	XM_011284330.2	protein_coding	4	c.282+40610G>A
chrA1	147534482	C	T	PASS	T	intron_variant	MODIFIER	SSBP2	101088719	transcript	XM_011284326.3	protein_coding	4	c.282+40610G>A
chrA1	147534482	C	T	PASS	T	intron_variant	MODIFIER	SSBP2	101088719	transcript	XM_019836180.1	protein_coding	4	c.261+40610G>A
chrA1	147536568	CTTCT	C	PASS	C	intron_variant	MODIFIER	SSBP2	101088719	transcript	XM_011284322.2	protein_coding	4	c.282+38520_282+38523delAGAA
chrA1	147536568	CTTCT	C	PASS	C	intron_variant	MODIFIER	SSBP2	101088719	transcript	XM_011284323.3	protein_coding	4	c.282+38520_282+38523delAGAA
chrA1	147536568	CTTCT	C	PASS	C	intron_variant	MODIFIER	SSBP2	101088719	transcript	XM_011284330.2	protein_coding	4	c.282+38520_282+38523delAGAA
chrA1	147536568	CTTCT	C	PASS	C	intron_variant	MODIFIER	SSBP2	101088719	transcript	XM_011284326.3	protein_coding	4	c.282+38520_282+38523delAGAA
chrA1	147536568	CTTCT	C	PASS	C	intron_variant	MODIFIER	SSBP2	101088719	transcript	XM_019836180.1	protein_coding	4	c.261+38520_261+38523delAGAA
chrA1	147536705	A	AAAAAG	PASS	AAAAAG	intron_variant	MODIFIER	SSBP2	101088719	transcript	XM_011284322.2	protein_coding	4	c.282+38386_282+38387insCTTTT
chrA1	147536705	A	AAAAAG	PASS	AAAAAG	intron_variant	MODIFIER	SSBP2	101088719	transcript	XM_011284323.3	protein_coding	4	c.282+38386_282+38387insCTTTT
chrA1	147536705	A	AAAAAG	PASS	AAAAAG	intron_variant	MODIFIER	SSBP2	101088719	transcript	XM_011284330.2	protein_coding	4	c.282+38386_282+38387insCTTTT
chrA1	147536705	A	AAAAAG	PASS	AAAAAG	intron_variant	MODIFIER	SSBP2	101088719	transcript	XM_011284326.3	protein_coding	4	c.282+38386_282+38387insCTTTT
chrA1	147536705	A	AAAAAG	PASS	AAAAAG	intron_variant	MODIFIER	SSBP2	101088719	transcript	XM_019836180.1	protein_coding	4	c.261+38386_261+38387insCTTTT
chrA1	147537432	G	A	PASS	A	intron_variant	MODIFIER	SSBP2	101088719	transcript	XM_011284322.2	protein_coding	4	c.282+37660C>T
chrA1	147537432	G	A	PASS	A	intron_variant	MODIFIER	SSBP2	101088719	transcript	XM_011284323.3	protein_coding	4	c.282+37660C>T
chrA1	147537432	G	A	PASS	A	intron_variant	MODIFIER	SSBP2	101088719	transcript	XM_011284330.2	protein_coding	4	c.282+37660C>T
chrA1	147537432	G	A	PASS	A	intron_variant	MODIFIER	SSBP2	101088719	transcript	XM_011284326.3	protein_coding	4	c.282+37660C>T
chrA1	147537432	G	A	PASS	A	intron_variant	MODIFIER	SSBP2	101088719	transcript	XM_019836180.1	protein_coding	4	c.261+37660C>T
chrA1	147537559	T	G	PASS	G	intron_variant	MODIFIER	SSBP2	101088719	transcript	XM_011284322.2	protein_coding	4	c.282+37533A>C
chrA1	147537559	T	G	PASS	G	intron_variant	MODIFIER	SSBP2	101088719	transcript	XM_011284323.3	protein_coding	4	c.282+37533A>C
chrA1	147537559	T	G	PASS	G	intron_variant	MODIFIER	SSBP2	101088719	transcript	XM_011284330.2	protein_coding	4	c.282+37533A>C
chrA1	147537559	T	G	PASS	G	intron_variant	MODIFIER	SSBP2	101088719	transcript	XM_011284326.3	protein_coding	4	c.282+37533A>C
chrA1	147537559	T	G	PASS	G	intron_variant	MODIFIER	SSBP2	101088719	transcript	XM_019836180.1	protein_coding	4	c.261+37533A>C
chrA1	147545771	TTA	T	PASS	T	intron_variant	MODIFIER	SSBP2	101088719	transcript	XM_011284322.2	protein_coding	4	c.282+29319_282+29320delTA
chrA1	147545771	TTA	T	PASS	T	intron_variant	MODIFIER	SSBP2	101088719	transcript	XM_011284323.3	protein_coding	4	c.282+29319_282+29320delTA
chrA1	147545771	TTA	T	PASS	T	intron_variant	MODIFIER	SSBP2	101088719	transcript	XM_011284330.2	protein_coding	4	c.282+29319_282+29320delTA
chrA1	147545771	TTA	T	PASS	T	intron_variant	MODIFIER	SSBP2	101088719	transcript	XM_011284326.3	protein_coding	4	c.282+29319_282+29320delTA
chrA1	147545771	TTA	T	PASS	T	intron_variant	MODIFIER	SSBP2	101088719	transcript	XM_019836180.1	protein_coding	4	c.261+29319_261+29320delTA
chrA1	147550172	G	A	PASS	A	intron_variant	MODIFIER	SSBP2	101088719	transcript	XM_011284322.2	protein_coding	4	c.282+24920C>T
chrA1	147550172	G	A	PASS	A	intron_variant	MODIFIER	SSBP2	101088719	transcript	XM_011284323.3	protein_coding	4	c.282+24920C>T
chrA1	147550172	G	A	PASS	A	intron_variant	MODIFIER	SSBP2	101088719	transcript	XM_011284330.2	protein_coding	4	c.282+24920C>T
chrA1	147550172	G	A	PASS	A	intron_variant	MODIFIER	SSBP2	101088719	transcript	XM_011284326.3	protein_coding	4	c.282+24920C>T
chrA1	147550172	G	A	PASS	A	intron_variant	MODIFIER	SSBP2	101088719	transcript	XM_019836180.1	protein_coding	4	c.261+24920C>T
chrA1	147551584	A	C	PASS	C	intron_variant	MODIFIER	SSBP2	101088719	transcript	XM_011284322.2	protein_coding	4	c.282+23508T>G
chrA1	147551584	A	C	PASS	C	intron_variant	MODIFIER	SSBP2	101088719	transcript	XM_011284323.3	protein_coding	4	c.282+23508T>G
chrA1	147551584	A	C	PASS	C	intron_variant	MODIFIER	SSBP2	101088719	transcript	XM_011284330.2	protein_coding	4	c.282+23508T>G
chrA1	147551584	A	C	PASS	C	intron_variant	MODIFIER	SSBP2	101088719	transcript	XM_011284326.3	protein_coding	4	c.282+23508T>G
chrA1	147551584	A	C	PASS	C	intron_variant	MODIFIER	SSBP2	101088719	transcript	XM_019836180.1	protein_coding	4	c.261+23508T>G
chrA1	147553597	G	T	PASS	T	intron_variant	MODIFIER	SSBP2	101088719	transcript	XM_011284322.2	protein_coding	4	c.282+21495C>A
chrA1	147553597	G	T	PASS	T	intron_variant	MODIFIER	SSBP2	101088719	transcript	XM_011284323.3	protein_coding	4	c.282+21495C>A
chrA1	147553597	G	T	PASS	T	intron_variant	MODIFIER	SSBP2	101088719	transcript	XM_011284330.2	protein_coding	4	c.282+21495C>A
chrA1	147553597	G	T	PASS	T	intron_variant	MODIFIER	SSBP2	101088719	transcript	XM_011284326.3	protein_coding	4	c.282+21495C>A
chrA1	147553597	G	T	PASS	T	intron_variant	MODIFIER	SSBP2	101088719	transcript	XM_019836180.1	protein_coding	4	c.261+21495C>A
chrA1	147554177	C	T	PASS	T	intron_variant	MODIFIER	SSBP2	101088719	transcript	XM_011284322.2	protein_coding	4	c.282+20915G>A
chrA1	147554177	C	T	PASS	T	intron_variant	MODIFIER	SSBP2	101088719	transcript	XM_011284323.3	protein_coding	4	c.282+20915G>A
chrA1	147554177	C	T	PASS	T	intron_variant	MODIFIER	SSBP2	101088719	transcript	XM_011284330.2	protein_coding	4	c.282+20915G>A
chrA1	147554177	C	T	PASS	T	intron_variant	MODIFIER	SSBP2	101088719	transcript	XM_011284326.3	protein_coding	4	c.282+20915G>A
chrA1	147554177	C	T	PASS	T	intron_variant	MODIFIER	SSBP2	101088719	transcript	XM_019836180.1	protein_coding	4	c.261+20915G>A
chrA1	147559440	C	T	PASS	T	intron_variant	MODIFIER	SSBP2	101088719	transcript	XM_011284322.2	protein_coding	4	c.282+15652G>A
chrA1	147559440	C	T	PASS	T	intron_variant	MODIFIER	SSBP2	101088719	transcript	XM_011284323.3	protein_coding	4	c.282+15652G>A
chrA1	147559440	C	T	PASS	T	intron_variant	MODIFIER	SSBP2	101088719	transcript	XM_011284330.2	protein_coding	4	c.282+15652G>A
[truncated: 14,850 more rows]
